# Supplementary material for: Metabolic Phenotyping Study of Mouse Brain Following Microbiome Disruption by C. difficile Colonization
Source: MDPI journal article supplement (doi:10.3390/metabo12111039), 2022-10-28
Supplement: s1 [file s1]

## SUPPLEMENTARY MATERIAL

### Metabolic phenotyping study of mouse brain following microbiome disruption by *C. Difficile* colonisation

Olga Deda<sup>1,2\*</sup>, Melina Kachrimanidou<sup>3</sup>, Emily G Armitage<sup>4</sup>, Thomai Mouskeftara<sup>1,2</sup>, Neil J Loftus<sup>4</sup>, Ioannis Zervos<sup>5</sup>, Ioannis Taitzoglou<sup>5</sup>, Helen Gika<sup>1,2\*</sup>

<sup>1</sup>Laboratory of Forensic Medicine & Toxicology, Department of Medicine, Aristotle University of Thessaloniki, 54124 Thessaloniki, Greece

<sup>2</sup>Biomimic AUTH, Center for Interdisciplinary Research and Innovation (CIRI-AUTH), Balkan Center B1.4, 10th km Thessaloniki-Thermi Rd, P.O. Box 8318, GR 57001 Thessaloniki, Greece

<sup>3</sup>1st Laboratory of Microbiology, Department of Medicine, Aristotle University of Thessaloniki, 54124 Thessaloniki, Greece

<sup>4</sup>Shimadzu Corporation, Manchester M17 1GP, U.K

<sup>5</sup>Laboratory of [Animal](#) Physiology, Faculty of Veterinary Medicine, School of Health Sciences, Aristotle University of Thessaloniki, 54124 Thessaloniki, Greece

\*Corresponding Authors: Olga Deda, Helen Gika

**Table S1. Unique metabolites identified in brain extracts.** Compound names, chemical formulae, method of detection, metabolomics standards initiative (MSI) level of identification and chemical taxonomy (class and sub-class) are given for each. In the case where a metabolite was detected by more than one method, the most representative method for that compound was chosen for reporting and statistical analysis.

|    | Compound                        | Method        | Ionization | RT   | Chemical Formula                                                | MSI level identification | Class                               | Subclass                                  |
|----|---------------------------------|---------------|------------|------|-----------------------------------------------------------------|--------------------------|-------------------------------------|-------------------------------------------|
| 1  | 1,5-Anhydroglucitol             | GC-MS         | EI+        | 21.9 | C <sub>6</sub> H <sub>12</sub> O <sub>5</sub>                   | 2                        | Organooxygen compounds              | Carbohydrates and carbohydrate conjugates |
| 2  | 2,3-Butanediol                  | GC-MS         | EI+        | 9.3  | C <sub>4</sub> H <sub>10</sub> O <sub>2</sub>                   | 2                        | Organooxygen compounds              | Alcohols and polyols                      |
| 3  | 2-Hydroxybutyric acid           | GC-MS/MS      | EI+        | 8.6  | C <sub>4</sub> H <sub>8</sub> O <sub>3</sub>                    | 1                        | Hydroxy acids and derivatives       | Alpha hydroxy acids and derivatives       |
| 4  | 2-Ketoglutaric acid             | GC-MS/MS      | EI+        | 20.1 | C <sub>5</sub> H <sub>6</sub> O <sub>5</sub>                    | 1                        | Keto acids and derivatives          | Gamma-keto acids and derivatives          |
| 5  | 2-Hydroxyisovaleric acid        | GC-MS/MS      | EI+        | 9.5  | C <sub>5</sub> H <sub>10</sub> O <sub>3</sub>                   | 1                        | Fatty Acyls                         | Fatty acids and conjugates                |
| 6  | 3,4-Dihydroxyphenylacetic acid  | GC-MS/MS      | EI+        | 25.5 | C <sub>8</sub> H <sub>8</sub> O <sub>4</sub>                    | 1                        | Phenols                             | Benzenediols                              |
| 7  | 3-Hydroxy-3-methylglutaric acid | GC-MS/MS      | EI+        | 20.6 | C <sub>6</sub> H <sub>10</sub> O <sub>5</sub>                   | 1                        | Fatty Acyls                         | Fatty acids and conjugates                |
| 8  | 3-Hydroxybutyric acid           | GC-MS/MS      | EI+        | 9.4  | C <sub>4</sub> H <sub>8</sub> O <sub>3</sub>                    | 1                        | Hydroxy acids and derivatives       | Beta hydroxy acids and derivatives        |
| 9  | 3-Methyl-2-oxovaleric acid      | GC-MS/MS      | EI+        | 9.9  | C <sub>6</sub> H <sub>10</sub> O <sub>3</sub>                   | 1                        | Keto acids and derivatives          | Short-chain keto acids and derivatives    |
| 10 | 4-Hydroxybenzoic acid           | GC-MS/MS      | EI+        | 20.9 | C <sub>7</sub> H <sub>6</sub> O <sub>3</sub>                    | 1                        | Benzene and substituted derivatives | Benzoic acids and derivatives             |
| 11 | 4-Hydroxyphenyllactic acid      | GC-MS/MS      | EI+        | 26.9 | C <sub>9</sub> H <sub>10</sub> O <sub>4</sub>                   | 1                        | Phenylpropanoic acids               |                                           |
| 12 | 5-Hydroxyindole-3-acetic        | GC-MS/MS      | EI+        | 31.5 | C <sub>10</sub> H <sub>9</sub> NO <sub>3</sub>                  | 1                        | Indoles and derivatives             | Indolyl carboxylic acids and derivatives  |
| 13 | 5-Methylthioadenosine           | RP-LC-HRMS/MS | ESI+       | 2.6  | C <sub>11</sub> H <sub>15</sub> N <sub>5</sub> O <sub>3</sub> S | 1                        | 5'-deoxyribonucleosides             | 5'-deoxy-5'-thionucleosides               |
| 14 | Acetylcarnitine                 | RP-LC-        | ESI+       | 0.6  | C <sub>9</sub> H <sub>17</sub> NO <sub>4</sub>                  | 1                        | Fatty Acyls                         | Fatty acid esters                         |

|    |                         | HRMS/MS           |      |      |                                                                 |   |                                     |                                           |
|----|-------------------------|-------------------|------|------|-----------------------------------------------------------------|---|-------------------------------------|-------------------------------------------|
| 15 | Aconitic acid           | GC-MS/MS          | EI+  | 23.9 | C <sub>6</sub> H <sub>6</sub> O <sub>6</sub>                    | 1 | Carboxylic acids and derivatives    | Tricarboxylic acids and derivatives       |
| 16 | Adenosine               | RP-LC-<br>HRMS/MS | ESI+ | 1.3  | C <sub>10</sub> H <sub>13</sub> N <sub>5</sub> O <sub>4</sub>   | 1 | Purine nucleosides                  |                                           |
| 17 | Adenosine monophosphate | RP-LC-<br>HRMS/MS | ESI+ | 0.6  | C <sub>10</sub> H <sub>14</sub> N <sub>5</sub> O <sub>7</sub> P | 1 | Purine nucleotides                  | Purine ribonucleotides                    |
| 18 | Adrenic acid            | RP-LC-<br>HRMS/MS | ESI+ | 12.7 | C <sub>22</sub> H <sub>36</sub> O <sub>2</sub>                  | 2 | Fatty Acyls                         | Fatty acids and conjugates                |
| 19 | Alanine                 | HILIC-MS/MS       | ESI+ | 16.0 | C <sub>3</sub> H <sub>7</sub> NO <sub>2</sub>                   | 1 | Carboxylic acids and derivatives    | Amino acids, peptides, and analogues      |
| 20 | alpha-D-Lyxopyranose    | GC-MS             | EI+  | 22.2 | C <sub>5</sub> H <sub>10</sub> O <sub>5</sub>                   | 2 | Organooxygen compounds              | Carbohydrates and carbohydrate conjugates |
| 21 | alpha-Linolenic acid    | GC-MS             | EI+  | 27.2 | C <sub>18</sub> H <sub>30</sub> O <sub>2</sub>                  | 2 | Fatty Acyls                         | Lineolic acids and derivatives            |
| 22 | alpha-Tocopherol        | GC-MS             | EI+  | 31.3 | C <sub>29</sub> H <sub>50</sub> O <sub>2</sub>                  | 2 | Prenol lipids                       | Quinone and hydroquinone lipids           |
| 23 | Arabinitol              | GC-MS             | EI+  | 20.4 | C <sub>5</sub> H <sub>12</sub> O <sub>5</sub>                   | 2 | Organooxygen compounds              | Carbohydrates and carbohydrate conjugates |
| 24 | Arachidonic acid        | GC-MS             | EI+  | 26.3 | C <sub>20</sub> H <sub>32</sub> O <sub>2</sub>                  | 2 | Fatty Acyls                         | Fatty acids and conjugates                |
| 25 | Arachidonoylcarnitine   | RP-LC-<br>HRMS/MS | ESI+ | 6.7  | C <sub>27</sub> H <sub>46</sub> NO <sub>4</sub>                 | 2 | Fatty Acyls                         | Fatty acid esters                         |
| 26 | Arginine                | RP-LC-<br>HRMS/MS | ESI+ | 0.5  | C <sub>6</sub> H <sub>14</sub> N <sub>4</sub> O <sub>2</sub>    | 1 | Carboxylic acids and derivatives    | Amino acids, peptides, and analogues      |
| 27 | Asparagine              | HILIC-MS/MS       | ESI+ | 18.2 | C <sub>4</sub> H <sub>8</sub> N <sub>2</sub> O <sub>3</sub>     | 1 | Carboxylic acids and derivatives    | Amino acids, peptides, and analogue       |
| 28 | Aspartic acid           | RP-LC-<br>HRMS/MS | ESI+ | 0.6  | C <sub>4</sub> H <sub>7</sub> NO <sub>4</sub>                   | 1 | Carboxylic acids and derivatives    | Amino acids, peptides, and analogues      |
| 29 | Azelaic acid            | GC-MS/MS          | EI+  | 25.7 | C <sub>9</sub> H <sub>16</sub> O <sub>4</sub>                   | 1 | Fatty Acyls                         | Fatty acids and conjugates                |
| 30 | Benzoic acid            | GC-MS/MS          | EI+  | 11.5 | C <sub>7</sub> H <sub>6</sub> O <sub>2</sub>                    | 1 | Benzene and substituted derivatives | Benzoic acids and derivatives             |
| 31 | beta-Arabinopyranose    | GC-MS             | EI+  | 23.8 | C <sub>5</sub> H <sub>10</sub> O <sub>5</sub>                   | 2 | Organooxygen compounds              | Carbohydrates and carbohydrate conjugates |
| 32 | Betaine                 | HILIC-MS/MS       | ESI+ | 12.8 | C <sub>5</sub> H <sub>12</sub> NO <sub>2</sub>                  | 1 | Carboxylic acids and derivatives    | Amino acids, peptides, and analogues      |
| 33 | Carnitine               | RP-LC-<br>HRMS/MS | ESI+ | 0.6  | C <sub>7</sub> H <sub>15</sub> NO <sub>3</sub>                  | 1 | Organonitrogen compounds            | Quaternary ammonium salts                 |
| 34 | Cholesterol             | GC-MS             | EI+  | 31.4 | C <sub>27</sub> H <sub>46</sub> O                               | 2 | Steroids and steroid derivatives    | Cholestane steroids                       |
| 35 | Choline                 | HILIC-MS/MS       | ESI+ | 7.0  | C <sub>5</sub> H <sub>14</sub> NO                               | 1 | Organonitrogen compounds            | Quaternary ammonium salts                 |
| 36 | Citramalic acid         | GC-MS/MS          | EI+  | 17.6 | C <sub>5</sub> H <sub>8</sub> O <sub>5</sub>                    | 1 | Fatty Acyls                         | Fatty acids and conjugates                |
| 37 | Citric acid             | GC-MS/MS          | EI+  | 25.5 | C <sub>6</sub> H <sub>8</sub> O <sub>7</sub>                    | 1 | Carboxylic acids and derivatives    | Tricarboxylic acids and derivatives       |
| 38 | Citrulline              | RP-LC-<br>HRMS/MS | ESI+ | 0.6  | C <sub>6</sub> H <sub>13</sub> N <sub>3</sub> O <sub>3</sub>    | 1 | Carboxylic acids and derivatives    | Amino acids, peptides, and analogues      |

|    |                        |               |      |      |                                                                |   |                                  |                                           |
|----|------------------------|---------------|------|------|----------------------------------------------------------------|---|----------------------------------|-------------------------------------------|
| 39 | Creatine               | HILIC-MS/MS   | ESI+ | 16.3 | C <sub>4</sub> H <sub>9</sub> N <sub>3</sub> O <sub>2</sub>    | 1 | Carboxylic acids and derivatives | Amino acids, peptides, and analogues      |
| 40 | Creatinine             | HILIC-MS/MS   | ESI+ | 4.8  | C <sub>4</sub> H <sub>7</sub> N <sub>3</sub> O                 | 1 | Carboxylic acids and derivatives | Amino acids, peptides, and analogues      |
| 41 | Cysteine               | GC-MS         | EI+  | 18.5 | C <sub>3</sub> H <sub>7</sub> NO <sub>2</sub> S                | 2 | Carboxylic acids and derivatives | Amino acids, peptides, and analogues      |
| 42 | Cytidine               | RP-LC-HRMS/MS | ESI+ | 0.9  | C <sub>9</sub> H <sub>13</sub> N <sub>3</sub> O <sub>5</sub>   | 1 | Pyrimidine nucleosides           |                                           |
| 43 | Cytidine monophosphate | RP-LC-HRMS/MS | ESI- | 0.6  | C <sub>9</sub> H <sub>14</sub> N <sub>3</sub> O <sub>8</sub> P | 1 | Pyrimidine nucleotides           | Pyrimidine ribonucleotides                |
| 44 | Cytosine               | RP-LC-HRMS/MS | ESI+ | 0.6  | C <sub>4</sub> H <sub>5</sub> N <sub>3</sub> O                 | 1 | Diazines                         | Pyrimidines and pyrimidine derivatives    |
| 45 | D-Erythrose            | GC-MS         | EI+  | 23.0 | C <sub>4</sub> H <sub>8</sub> O <sub>4</sub>                   | 2 | Organooxygen compounds           | Carbohydrates and carbohydrate conjugates |
| 46 | D-Fructose             | GC-MS         | EI+  | 22.4 | C <sub>6</sub> H <sub>12</sub> O <sub>6</sub>                  | 2 | Organooxygen compounds           | Carbohydrates and carbohydrate conjugates |
| 47 | D-Fucitol              | GC-MS         | EI+  | 20.6 | C <sub>6</sub> H <sub>14</sub> O <sub>5</sub>                  | 2 | Organooxygen compounds           | Carbohydrates and carbohydrate conjugates |
| 48 | D-Glucose              | GC-MS         | EI+  | 22.9 | C <sub>6</sub> H <sub>12</sub> O <sub>6</sub>                  | 2 | Organooxygen compounds           | Carbohydrates and carbohydrate conjugates |
| 49 | Dimethylamine          | HILIC-MS/MS   | ESI+ | 8.2  | C <sub>2</sub> H <sub>7</sub> N                                | 1 | Organonitrogen compounds         | Amines                                    |
| 50 | D-Lyxose               | GC-MS         | EI+  | 20.1 | C <sub>6</sub> H <sub>10</sub> O <sub>7</sub>                  | 2 | Organooxygen compounds           | Carbohydrates and carbohydrate conjugates |
| 51 | D-Mannitol             | GC-MS         | EI+  | 23.4 | C <sub>6</sub> H <sub>14</sub> O <sub>6</sub>                  | 2 | Organooxygen compounds           | Carbohydrates and carbohydrate conjugates |
| 52 | Docosaehaenoic acid    | RP-LC-HRMS/MS | ESI+ | 10.5 | C <sub>22</sub> H <sub>32</sub> O <sub>2</sub>                 | 1 | Fatty Acyls                      | Fatty acids and conjugates                |
| 53 | Docosapentaenoic acid  | RP-LC-HRMS/MS | ESI+ | 11.3 | C <sub>22</sub> H <sub>34</sub> O <sub>2</sub>                 | 2 | Fatty Acyls                      | Fatty acids and conjugates                |
| 54 | Docosenamide           | RP-LC-HRMS/MS | ESI+ | 15.6 | C <sub>22</sub> H <sub>43</sub> NO                             | 2 | Fatty Acyls                      | Fatty amides                              |
| 55 | Eicosapentaenoic acid  | RP-LC-HRMS/MS | ESI+ | 9.7  | C <sub>20</sub> H <sub>30</sub> O <sub>2</sub>                 | 2 | Fatty Acyls                      | Fatty acids and conjugates                |
| 56 | Eicosatrienoic acid    | RP-LC-HRMS/MS | ESI+ | 11.9 | C <sub>20</sub> H <sub>34</sub> O <sub>2</sub>                 | 2 | Fatty Acyls                      | Fatty acids and conjugates                |
| 57 | Ethanolamine           | GC-MS         | EI+  | 14.1 | C <sub>2</sub> H <sub>7</sub> NO                               | 2 | Organonitrogen compounds         | Amines                                    |
| 58 | Fumaric acid           | GC-MS/MS      | EI+  | 14.3 | C <sub>4</sub> H <sub>4</sub> O <sub>4</sub>                   | 1 | Carboxylic acids and derivatives | Dicarboxylic acids and derivatives        |
| 59 | Galactose              | GC-MS         | EI+  | 25.6 | C <sub>6</sub> H <sub>12</sub> O <sub>6</sub>                  | 2 | Organooxygen compounds           | Carbohydrates and carbohydrate conjugates |
| 60 | Glutamic acid          | RP-LC-HRMS/MS | ESI+ | 0.6  | C <sub>5</sub> H <sub>9</sub> NO <sub>4</sub>                  | 1 | Carboxylic acids and derivatives | Amino acids, peptides, and analogues      |
| 61 | Glutamine              | HILIC-MS/MS   | ESI+ | 17.8 | C <sub>5</sub> H <sub>10</sub> N <sub>2</sub> O <sub>3</sub>   | 1 | Carboxylic acids and derivatives | Amino acids, peptides, and analogues      |

|    |                   |               |      |      |                                                               |   |                                  |                                           |
|----|-------------------|---------------|------|------|---------------------------------------------------------------|---|----------------------------------|-------------------------------------------|
| 62 | Glutaric acid     | GC-MS         | EI+  | 18.7 | C <sub>5</sub> H <sub>8</sub> O <sub>4</sub>                  | 2 | Carboxylic acids and derivatives | Dicarboxylic acids and derivatives        |
| 63 | Glyceric acid     | GC-MS/MS      | EI+  | 14.1 | C <sub>3</sub> H <sub>6</sub> O <sub>4</sub>                  | 1 | Organooxygen compounds           | Carbohydrates and carbohydrate conjugates |
| 64 | Glycerol          | GC-MS         | EI+  | 29.5 | C <sub>3</sub> H <sub>8</sub> O <sub>3</sub>                  | 2 | Organooxygen compounds           | Carbohydrates and carbohydrate conjugates |
| 65 | Glycine           | HILIC-MS/MS   | ESI+ | 17.0 | C <sub>2</sub> H <sub>5</sub> NO <sub>2</sub>                 | 1 | Carboxylic acids and derivatives | Amino acids, peptides, and analogues      |
| 66 | Glycolic acid     | GC-MS/MS      | EI+  | 7.2  | C <sub>2</sub> H <sub>4</sub> O <sub>3</sub>                  | 1 | Hydroxy acids and derivatives    | Alpha hydroxy acids and derivatives       |
| 67 | Guanosine         | RP-LC-HRMS/MS | ESI+ | 1.3  | C <sub>10</sub> H <sub>13</sub> N <sub>5</sub> O <sub>5</sub> | 1 | Purine nucleosides               |                                           |
| 68 | Histamine         | HILIC-MS/MS   | ESI+ | 13.7 | C <sub>5</sub> H <sub>9</sub> N <sub>3</sub>                  | 1 | Organonitrogen compounds         | Amines                                    |
| 69 | Histidine         | RP-LC-HRMS/MS | ESI+ | 0.52 | C <sub>6</sub> H <sub>9</sub> N <sub>3</sub> O <sub>2</sub>   | 1 | Carboxylic acids and derivatives | Amino acids, peptides, and analogues      |
| 70 | Homovallinic acid | GC-MS/MS      | EI+  | 24.2 | C <sub>9</sub> H <sub>10</sub> O <sub>4</sub>                 | 1 | Phenols                          | Methoxyphenols                            |
| 71 | Hypoxanthine      | HILIC-MS/MS   | ESI+ | 4.8  | C <sub>5</sub> H <sub>4</sub> N <sub>4</sub> O                | 1 | Imidazopyrimidines               | Purines and purine derivatives            |
| 72 | Inosine           | RP-LC-HRMS/MS | ESI+ | 1.4  | C <sub>10</sub> H <sub>12</sub> N <sub>4</sub> O <sub>5</sub> | 1 | Purine nucleosides               |                                           |
| 73 | Isoleucine        | HILIC-MS/MS   | ESI+ | 13.3 | C <sub>6</sub> H <sub>13</sub> NO <sub>2</sub>                | 1 | Carboxylic acids and derivatives | Amino acids, peptides, and analogues      |
| 74 | Lactic acid       | GC-MS/MS      | EI+  | 6.9  | C <sub>3</sub> H <sub>6</sub> O <sub>3</sub>                  | 1 | Hydroxy acids and derivatives    | Alpha hydroxy acids and derivatives       |
| 75 | Leucine           | HILIC-MS/MS   | ESI+ | 13.4 | C <sub>6</sub> H <sub>13</sub> NO <sub>2</sub>                | 1 | Hydroxy acids and derivatives    | Alpha hydroxy acids and derivatives       |
| 76 | LPC 14:0 sn-1     | RP-LC-HRMS/MS | ESI+ | 5.9  | C <sub>22</sub> H <sub>46</sub> NO <sub>7</sub> P             | 2 | Glycerophospholipids             | Glycerophosphocholines                    |
| 77 | LPC 14:0 sn-2     | RP-LC-HRMS/MS | ESI+ | 5.6  | C <sub>22</sub> H <sub>46</sub> NO <sub>7</sub> P             | 2 | Glycerophospholipids             | Glycerophosphocholines                    |
| 78 | LPC 16:0 sn-1     | RP-LC-HRMS/MS | ESI+ | 7.5  | C <sub>24</sub> H <sub>50</sub> NO <sub>7</sub> P             | 2 | Glycerophospholipids             | Glycerophosphocholines                    |
| 79 | LPC 16:0 sn-2     | RP-LC-HRMS/MS | ESI+ | 7.1  | C <sub>24</sub> H <sub>50</sub> NO <sub>7</sub> P             | 2 | Glycerophospholipids             | Glycerophosphocholines                    |
| 80 | LPC 16:1 sn-1     | RP-LC-HRMS/MS | ESI+ | 6.3  | C <sub>24</sub> H <sub>48</sub> NO <sub>7</sub> P             | 2 | Glycerophospholipids             | Glycerophosphocholines                    |
| 81 | LPC 16:1 sn-2     | RP-LC-HRMS/MS | ESI+ | 6.0  | C <sub>24</sub> H <sub>48</sub> NO <sub>7</sub> P             | 2 | Glycerophospholipids             | Glycerophosphocholines                    |
| 82 | LPC 18:0 sn-1     | RP-LC-HRMS/MS | ESI+ | 9.3  | C <sub>26</sub> H <sub>54</sub> NO <sub>7</sub> P             | 2 | Glycerophospholipids             | Glycerophosphocholines                    |
| 83 | LPC 18:0 sn-2     | RP-LC-HRMS/MS | ESI+ | 8.9  | C <sub>26</sub> H <sub>54</sub> NO <sub>7</sub> P             | 2 | Glycerophospholipids             | Glycerophosphocholines                    |
| 84 | LPC 18:1 sn-1     | RP-LC-HRMS/MS | ESI+ | 7.9  | C <sub>26</sub> H <sub>52</sub> NO <sub>7</sub> P             | 2 | Glycerophospholipids             | Glycerophosphocholines                    |
| 85 | LPC 18:1 sn-2     | RP-LC-        | ESI+ | 7.6  | C <sub>26</sub> H <sub>52</sub> NO <sub>7</sub> P             | 2 | Glycerophospholipids             | Glycerophosphocholines                    |

|     |               | HRMS/MS           |      |      |                                                   |   |                      |                             |
|-----|---------------|-------------------|------|------|---------------------------------------------------|---|----------------------|-----------------------------|
| 86  | LPC 18:2 sn-1 | RP-LC-<br>HRMS/MS | ESI+ | 6.8  | C <sub>26</sub> H <sub>50</sub> NO <sub>7</sub> P | 2 | Glycerophospholipids | Glycerophosphocholines      |
| 87  | LPC 18:2 sn-2 | RP-LC-<br>HRMS/MS | ESI+ | 6.6  | C <sub>26</sub> H <sub>50</sub> NO <sub>7</sub> P | 2 | Glycerophospholipids | Glycerophosphocholines      |
| 88  | LPC 20:0 sn-1 | RP-LC-<br>HRMS/MS | ESI+ | 11.4 | C <sub>28</sub> H <sub>58</sub> NO <sub>7</sub> P | 2 | Glycerophospholipids | Glycerophosphocholines      |
| 89  | LPC 20:0 sn-2 | RP-LC-<br>HRMS/MS | ESI+ | 11.0 | C <sub>28</sub> H <sub>58</sub> NO <sub>7</sub> P | 2 | Glycerophospholipids | Glycerophosphocholines      |
| 90  | LPC 20:1 sn-1 | RP-LC-<br>HRMS/MS | ESI+ | 9.6  | C <sub>28</sub> H <sub>56</sub> NO <sub>7</sub> P | 2 | Glycerophospholipids | Glycerophosphocholines      |
| 91  | LPC 20:1 sn-2 | RP-LC-<br>HRMS/MS | ESI+ | 9.3  | C <sub>28</sub> H <sub>56</sub> NO <sub>7</sub> P | 2 | Glycerophospholipids | Glycerophosphocholines      |
| 92  | LPC 20:4 sn-1 | RP-LC-<br>HRMS/MS | ESI+ | 6.8  | C <sub>28</sub> H <sub>50</sub> NO <sub>7</sub> P | 2 | Glycerophospholipids | Glycerophosphocholines      |
| 93  | LPC 20:4 sn-2 | RP-LC-<br>HRMS/MS | ESI+ | 6.6  | C <sub>28</sub> H <sub>50</sub> NO <sub>7</sub> P | 2 | Glycerophospholipids | Glycerophosphocholines      |
| 94  | LPC 20:5 sn-1 | RP-LC-<br>HRMS/MS | ESI+ | 6.1  | C <sub>28</sub> H <sub>48</sub> NO <sub>7</sub> P | 2 | Glycerophospholipids | Glycerophosphocholines      |
| 95  | LPC 20:5 sn-2 | RP-LC-<br>HRMS/MS | ESI+ | 5.8  | C <sub>28</sub> H <sub>48</sub> NO <sub>7</sub> P | 2 | Glycerophospholipids | Glycerophosphocholines      |
| 96  | LPC 22:4 sn-1 | RP-LC-<br>HRMS/MS | ESI+ | 8.1  | C <sub>30</sub> H <sub>54</sub> NO <sub>7</sub> P | 2 | Glycerophospholipids | Glycerophosphocholines      |
| 97  | LPC 22:4 sn-2 | RP-LC-<br>HRMS/MS | ESI+ | 7.8  | C <sub>30</sub> H <sub>54</sub> NO <sub>7</sub> P | 2 | Glycerophospholipids | Glycerophosphocholines      |
| 98  | LPC 22:6 sn-1 | RP-LC-<br>HRMS/MS | ESI+ | 6.8  | C <sub>30</sub> H <sub>50</sub> NO <sub>7</sub> P | 2 | Glycerophospholipids | Glycerophosphocholines      |
| 99  | LPC 22:6 sn-2 | RP-LC-<br>HRMS/MS | ESI+ | 6.6  | C <sub>30</sub> H <sub>50</sub> NO <sub>7</sub> P | 2 | Glycerophospholipids | Glycerophosphocholines      |
| 100 | LPE 16:0 sn-1 | RP-LC-<br>HRMS/MS | ESI+ | 7.4  | C <sub>21</sub> H <sub>44</sub> NO <sub>7</sub> P | 2 | Glycerophospholipids | Glycerophosphoethanolamines |
| 101 | LPE 16:0 sn-2 | RP-LC-<br>HRMS/MS | ESI+ | 7.1  | C <sub>21</sub> H <sub>44</sub> NO <sub>7</sub> P | 2 | Glycerophospholipids | Glycerophosphoethanolamines |
| 102 | LPE 16:1 sn-1 | RP-LC-<br>HRMS/MS | ESI+ | 6.3  | C <sub>21</sub> H <sub>42</sub> NO <sub>7</sub> P | 2 | Glycerophospholipids | Glycerophosphoethanolamines |
| 103 | LPE 16:1 sn-2 | RP-LC-<br>HRMS/MS | ESI+ | 6.0  | C <sub>21</sub> H <sub>42</sub> NO <sub>7</sub> P | 2 | Glycerophospholipids | Glycerophosphoethanolamines |
| 104 | LPE 18:0 sn-1 | RP-LC-<br>HRMS/MS | ESI+ | 9.3  | C <sub>23</sub> H <sub>48</sub> NO <sub>7</sub> P | 2 | Glycerophospholipids | Glycerophosphoethanolamines |
| 105 | LPE 18:0 sn-2 | RP-LC-<br>HRMS/MS | ESI+ | 8.9  | C <sub>23</sub> H <sub>48</sub> NO <sub>7</sub> P | 2 | Glycerophospholipids | Glycerophosphoethanolamines |
| 106 | LPE 18:1 sn-1 | RP-LC-<br>HRMS/MS | ESI+ | 7.8  | C <sub>23</sub> H <sub>46</sub> NO <sub>7</sub> P | 2 | Glycerophospholipids | Glycerophosphoethanolamines |
| 107 | LPE 18:1 sn-2 | RP-LC-<br>HRMS/MS | ESI+ | 7.5  | C <sub>23</sub> H <sub>46</sub> NO <sub>7</sub> P | 2 | Glycerophospholipids | Glycerophosphoethanolamines |

|     |               |                   |      |      |                                                   |   |                      |                             |
|-----|---------------|-------------------|------|------|---------------------------------------------------|---|----------------------|-----------------------------|
| 108 | LPE 18:2 sn-1 | RP-LC-<br>HRMS/MS | ESI+ | 6.8  | C <sub>23</sub> H <sub>44</sub> NO <sub>7</sub> P | 2 | Glycerophospholipids | Glycerophosphoethanolamines |
| 109 | LPE 18:2 sn-2 | RP-LC-<br>HRMS/MS | ESI+ | 6.5  | C <sub>23</sub> H <sub>44</sub> NO <sub>7</sub> P | 2 | Glycerophospholipids | Glycerophosphoethanolamines |
| 110 | LPE 20:1 sn-1 | RP-LC-<br>HRMS/MS | ESI+ | 9.6  | C <sub>25</sub> H <sub>50</sub> NO <sub>7</sub> P | 2 | Glycerophospholipids | Glycerophosphoethanolamines |
| 111 | LPE 20:1 sn-2 | RP-LC-<br>HRMS/MS | ESI+ | 9.2  | C <sub>25</sub> H <sub>50</sub> NO <sub>7</sub> P | 2 | Glycerophospholipids | Glycerophosphoethanolamines |
| 112 | LPE 20:2 sn-1 | RP-LC-<br>HRMS/MS | ESI+ | 8.2  | C <sub>25</sub> H <sub>48</sub> NO <sub>7</sub> P | 2 | Glycerophospholipids | Glycerophosphoethanolamines |
| 113 | LPE 20:2 sn-2 | RP-LC-<br>HRMS/MS | ESI+ | 8.0  | C <sub>25</sub> H <sub>48</sub> NO <sub>7</sub> P | 2 | Glycerophospholipids | Glycerophosphoethanolamines |
| 114 | LPE 20:4 sn-1 | RP-LC-<br>HRMS/MS | ESI+ | 6.8  | C <sub>25</sub> H <sub>44</sub> NO <sub>7</sub> P | 2 | Glycerophospholipids | Glycerophosphoethanolamines |
| 115 | LPE 20:4 sn-2 | RP-LC-<br>HRMS/MS | ESI+ | 6.6  | C <sub>25</sub> H <sub>44</sub> NO <sub>7</sub> P | 2 | Glycerophospholipids | Glycerophosphoethanolamines |
| 116 | LPE 22:4 sn-1 | RP-LC-<br>HRMS/MS | ESI+ | 8.0  | C <sub>27</sub> H <sub>48</sub> NO <sub>7</sub> P | 2 | Glycerophospholipids | Glycerophosphoethanolamines |
| 117 | LPE 22:4 sn-2 | RP-LC-<br>HRMS/MS | ESI+ | 7.8  | C <sub>27</sub> H <sub>48</sub> NO <sub>7</sub> P | 2 | Glycerophospholipids | Glycerophosphoethanolamines |
| 118 | LPE 22:6 sn-1 | RP-LC-<br>HRMS/MS | ESI+ | 6.7  | C <sub>27</sub> H <sub>44</sub> NO <sub>7</sub> P | 2 | Glycerophospholipids | Glycerophosphoethanolamines |
| 119 | LPE 22:6 sn-2 | RP-LC-<br>HRMS/MS | ESI+ | 6.5  | C <sub>27</sub> H <sub>44</sub> NO <sub>7</sub> P | 2 | Glycerophospholipids | Glycerophosphoethanolamines |
| 120 | LPE P-16:0    | RP-LC-<br>HRMS/MS | ESI+ | 7.9  | C <sub>21</sub> H <sub>44</sub> NO <sub>6</sub> P | 2 | Glycerophospholipids | Glycerophosphoethanolamines |
| 121 | LPE P-18:0    | RP-LC-<br>HRMS/MS | ESI+ | 9.8  | C <sub>23</sub> H <sub>48</sub> NO <sub>6</sub> P | 2 | Glycerophospholipids | Glycerophosphoethanolamines |
| 122 | LPE P-18:1    | RP-LC-<br>HRMS/MS | ESI+ | 8.3  | C <sub>23</sub> H <sub>46</sub> NO <sub>6</sub> P | 2 | Glycerophospholipids | Glycerophosphoethanolamines |
| 123 | LPE P-20:0    | RP-LC-<br>HRMS/MS | ESI+ | 12.0 | C <sub>25</sub> H <sub>52</sub> NO <sub>6</sub> P | 2 | Glycerophospholipids | Glycerophosphoethanolamines |
| 124 | LPE P-20:1    | RP-LC-<br>HRMS/MS | ESI+ | 10.1 | C <sub>25</sub> H <sub>50</sub> NO <sub>6</sub> P | 2 | Glycerophospholipids | Glycerophosphoethanolamines |
| 125 | LPE P-22:1    | RP-LC-<br>HRMS/MS | ESI+ | 12.3 | C <sub>27</sub> H <sub>54</sub> NO <sub>6</sub> P | 2 | Glycerophospholipids | Glycerophosphoethanolamines |
| 126 | LPG 16:0 sn-1 | RP-LC-<br>HRMS/MS | ESI- | 9.0  | C <sub>22</sub> H <sub>45</sub> O <sub>9</sub> P  | 2 | Glycerophospholipids | Glycerophosphoglycerols     |
| 127 | LPG 16:0 sn-2 | RP-LC-<br>HRMS/MS | ESI- | 8.5  | C <sub>24</sub> H <sub>50</sub> NO <sub>7</sub> P | 2 | Glycerophospholipids | Glycerophosphoglycerols     |
| 128 | LPG 18:0 sn-1 | RP-LC-<br>HRMS/MS | ESI- | 12.1 | C <sub>24</sub> H <sub>49</sub> O <sub>9</sub> P  | 2 | Glycerophospholipids | Glycerophosphoglycerols     |
| 129 | LPG 18:0 sn-2 | RP-LC-<br>HRMS/MS | ESI- | 11.3 | C <sub>24</sub> H <sub>49</sub> O <sub>9</sub> P  | 2 | Glycerophospholipids | Glycerophosphoglycerols     |
| 130 | LPG 18:1 sn-1 | RP-LC-            | ESI- | 9.6  | C <sub>24</sub> H <sub>47</sub> O <sub>9</sub> P  | 2 | Glycerophospholipids | Glycerophosphoglycerols     |

|     |               | HRMS/MS           |      |      |                                                              |   |                                  |                                      |
|-----|---------------|-------------------|------|------|--------------------------------------------------------------|---|----------------------------------|--------------------------------------|
| 131 | LPG 18:1 sn-2 | RP-LC-<br>HRMS/MS | ESI- | 9.1  | C <sub>24</sub> H <sub>47</sub> O <sub>9</sub> P             | 2 | Glycerophospholipids             | Glycerophosphoglycerols              |
| 132 | LPG 20:4 sn-1 | RP-LC-<br>HRMS/MS | ESI- | 8.1  | C <sub>26</sub> H <sub>45</sub> O <sub>9</sub> P             | 2 | Glycerophospholipids             | Glycerophosphoglycerols              |
| 133 | LPG 20:4 sn-2 | RP-LC-<br>HRMS/MS | ESI- | 7.8  | C <sub>26</sub> H <sub>45</sub> O <sub>9</sub> P             | 2 | Glycerophospholipids             | Glycerophosphoglycerols              |
| 134 | LPG 22:6 sn-1 | RP-LC-<br>HRMS/MS | ESI- | 8.0  | C <sub>28</sub> H <sub>45</sub> O <sub>9</sub> P             | 2 | Glycerophospholipids             | Glycerophosphoglycerols              |
| 135 | LPG 22:6 sn-2 | RP-LC-<br>HRMS/MS | ESI- | 7.8  | C <sub>28</sub> H <sub>45</sub> O <sub>9</sub> P             | 2 | Glycerophospholipids             | Glycerophosphoglycerols              |
| 136 | LPI 16:0 sn-1 | RP-LC-<br>HRMS/MS | ESI- | 8.0  | C <sub>25</sub> H <sub>49</sub> O <sub>12</sub> P            | 2 | Glycerophospholipids             | Glycerophosphoinositols              |
| 137 | LPI 16:0 sn-2 | RP-LC-<br>HRMS/MS | ESI- | 7.5  | C <sub>25</sub> H <sub>49</sub> O <sub>12</sub> P            | 2 | Glycerophospholipids             | Glycerophosphoinositols              |
| 138 | LPI 18:0 sn-1 | RP-LC-<br>HRMS/MS | ESI- | 10.5 | C <sub>27</sub> H <sub>53</sub> O <sub>12</sub> P            | 2 | Glycerophospholipids             | Glycerophosphoinositols              |
| 139 | LPI 18:0 sn-2 | RP-LC-<br>HRMS/MS | ESI- | 9.9  | C <sub>27</sub> H <sub>53</sub> O <sub>12</sub> P            | 2 | Glycerophospholipids             | Glycerophosphoinositols              |
| 140 | LPI 18:1 sn-1 | RP-LC-<br>HRMS/MS | ESI- | 8.5  | C <sub>27</sub> H <sub>51</sub> O <sub>12</sub> P            | 2 | Glycerophospholipids             | Glycerophosphoinositols              |
| 141 | LPI 18:1 sn-2 | RP-LC-<br>HRMS/MS | ESI- | 8.1  | C <sub>27</sub> H <sub>51</sub> O <sub>12</sub> P            | 2 | Glycerophospholipids             | Glycerophosphoinositols              |
| 142 | LPI 20:4 sn-1 | RP-LC-<br>HRMS/MS | ESI- | 7.3  | C <sub>29</sub> H <sub>49</sub> O <sub>12</sub> P            | 2 | Glycerophospholipids             | Glycerophosphoinositols              |
| 143 | LPI 20:4 sn-2 | RP-LC-<br>HRMS/MS | ESI- | 7.0  | C <sub>29</sub> H <sub>49</sub> O <sub>12</sub> P            | 2 | Glycerophospholipids             | Glycerophosphoinositols              |
| 144 | LPI 22:6 sn-1 | RP-LC-<br>HRMS/MS | ESI- | 7.2  | C <sub>31</sub> H <sub>49</sub> O <sub>12</sub> P            | 2 | Glycerophospholipids             | Glycerophosphoinositols              |
| 145 | LPI 22:6 sn-2 | RP-LC-<br>HRMS/MS | ESI- | 7.0  | C <sub>31</sub> H <sub>49</sub> O <sub>12</sub> P            | 2 | Glycerophospholipids             | Glycerophosphoinositols              |
| 146 | LPS 18:0 sn-1 | RP-LC-<br>HRMS/MS | ESI- | 10.0 | C <sub>24</sub> H <sub>48</sub> NO <sub>9</sub> P            | 2 | Glycerophospholipids             | Glycerophosphoserines                |
| 147 | LPS 18:0 sn-2 | RP-LC-<br>HRMS/MS | ESI- | 9.5  | C <sub>24</sub> H <sub>48</sub> NO <sub>9</sub> P            | 2 | Glycerophospholipids             | Glycerophosphoserines                |
| 148 | LPS 18:1 sn-1 | RP-LC-<br>HRMS/MS | ESI- | 8.4  | C <sub>24</sub> H <sub>46</sub> NO <sub>9</sub> P            | 2 | Glycerophospholipids             | Glycerophosphoserines                |
| 149 | LPS 18:1 sn-2 | RP-LC-<br>HRMS/MS | ESI- | 7.9  | C <sub>24</sub> H <sub>46</sub> NO <sub>9</sub> P            | 2 | Glycerophospholipids             | Glycerophosphoserines                |
| 150 | Lysine        | GC-MS             | EI+  | 21.8 | C <sub>6</sub> H <sub>14</sub> N <sub>2</sub> O <sub>2</sub> | 2 | Carboxylic acids and derivatives | Amino acids, peptides, and analogues |
| 151 | Malic acid    | GC-MS/MS          | EI+  | 18.1 | C <sub>4</sub> H <sub>6</sub> O <sub>5</sub>                 | 1 | Hydroxy acids and derivatives    | Beta hydroxy acids and derivatives   |
| 152 | Malonic acid  | GC-MS/MS          | EI+  | 10.6 | C <sub>3</sub> H <sub>4</sub> O <sub>4</sub>                 | 1 | Carboxylic acids and derivatives | Dicarboxylic acids and derivatives   |

|     |                                        |                   |      |      |                                                               |   |                                  |                                              |
|-----|----------------------------------------|-------------------|------|------|---------------------------------------------------------------|---|----------------------------------|----------------------------------------------|
| 153 | Methionine                             | HILIC-MS/MS       | ESI+ | 14.0 | C <sub>5</sub> H <sub>11</sub> NO <sub>2</sub> S              | 1 | Carboxylic acids and derivatives | Carboxylic acids and derivatives             |
| 154 | Methylamine                            | HILIC-MS/MS       | ESI+ | 10.0 | CH <sub>5</sub> N                                             | 1 | Organonitrogen compounds         | Amines                                       |
| 155 | MG 14:0 (1)                            | GC-MS             | EI+  | 27.3 | C <sub>17</sub> H <sub>34</sub> O <sub>4</sub>                | 2 | Glycerolipids                    | Monoacylglycerols                            |
| 156 | MG 16:0 (1)                            | RP-LC-<br>HRMS/MS | ESI+ | 10.8 | C <sub>19</sub> H <sub>38</sub> O <sub>4</sub>                | 2 | Glycerolipids                    | Monoacylglycerols                            |
| 157 | MG 16:0 (2)                            | RP-LC-<br>HRMS/MS | ESI+ | 11.2 | C <sub>19</sub> H <sub>38</sub> O <sub>4</sub>                | 2 | Glycerolipids                    | Monoacylglycerols                            |
| 158 | MG 18:0 (1)                            | RP-LC-<br>HRMS/MS | ESI+ | 13.2 | C <sub>21</sub> H <sub>42</sub> O <sub>4</sub>                | 2 | Glycerolipids                    | Monoacylglycerols                            |
| 159 | MG 18:0 (2)                            | RP-LC-<br>HRMS/MS | EI+  | 29.5 | C <sub>21</sub> H <sub>42</sub> O <sub>4</sub>                | 2 | Glycerolipids                    | Monoacylglycerols                            |
| 160 | MG 18:1 (1)                            | RP-LC-<br>HRMS/MS | EI+  | 29.4 | C <sub>21</sub> H <sub>40</sub> O <sub>4</sub>                | 2 | Glycerolipids                    | Monoacylglycerols                            |
| 161 | MG 18:1 (2)                            | RP-LC-<br>HRMS/MS | ESI+ | 11.6 | C <sub>21</sub> H <sub>40</sub> O <sub>4</sub>                | 2 | Glycerolipids                    | Monoacylglycerols                            |
| 162 | MG 18:2 (2)                            | GC-MS             | EI+  | 29.9 | C <sub>21</sub> H <sub>36</sub> O <sub>4</sub>                | 2 | Glycerolipids                    | Monoacylglycerols                            |
| 163 | MG 20:4 (1)                            | RP-LC-<br>HRMS/MS | ESI+ | 9.6  | C <sub>23</sub> H <sub>38</sub> O <sub>4</sub>                | 2 | Glycerolipids                    | Monoacylglycerols                            |
| 164 | MG 20:4 (2)                            | RP-LC-<br>HRMS/MS | ESI+ | 9.8  | C <sub>23</sub> H <sub>38</sub> O <sub>4</sub>                | 2 | Glycerolipids                    | Monoacylglycerols                            |
| 165 | MG 22:6 (1)                            | RP-LC-<br>HRMS/MS | ESI+ | 9.4  | C <sub>25</sub> H <sub>38</sub> O <sub>4</sub>                | 2 | Glycerolipids                    | Monoacylglycerols                            |
| 166 | MG 22:6 (2)                            | RP-LC-<br>HRMS/MS | ESI+ | 9.6  | C <sub>25</sub> H <sub>38</sub> O <sub>4</sub>                | 2 | Glycerolipids                    | Monoacylglycerols                            |
| 167 | Monoisoamylamine                       | HILIC-MS/MS       | ESI+ | 4.6  | C <sub>5</sub> H <sub>13</sub> N                              | 1 | Organonitrogen compounds         | Amines                                       |
| 168 | Myo-Inositol                           | GC-MS             | EI+  | 25.2 | C <sub>6</sub> H <sub>12</sub> O <sub>6</sub>                 | 2 | Organooxygen compounds           | Alcohols and polyols                         |
| 169 | NAA (N-acetylaspartate)                | RP-LC-<br>HRMS/MS | ESI+ | 0.8  | C <sub>6</sub> H <sub>9</sub> NO <sub>5</sub>                 | 2 | Carboxylic acids and derivatives | Amino acids, peptides, and<br>analogues      |
| 170 | NAAG (N-acetyl-aspartyl-<br>glutamate) | RP-LC-<br>HRMS/MS | ESI+ | 1.1  | C <sub>11</sub> H <sub>16</sub> N <sub>2</sub> O <sub>8</sub> | 2 | Carboxylic acids and derivatives | Amino acids, peptides, and<br>analogues      |
| 171 | N-Acetyl-L-glutamic acid               | GC-MS             | EI+  | 17.2 | C <sub>7</sub> H <sub>11</sub> NO <sub>5</sub>                | 2 | Carboxylic acids and derivatives | Amino acids, peptides, and<br>analogues      |
| 172 | N-Acetylneuraminic acid                | RP-LC-<br>HRMS/MS | ESI- | 0.6  | C <sub>11</sub> H <sub>19</sub> NO <sub>9</sub>               | 1 | Organooxygen compounds           | Carbohydrates and carbohydrate<br>conjugates |
| 173 | Nervonic acid                          | GC-MS             | EI+  | 29.6 | C <sub>24</sub> H <sub>46</sub> O <sub>2</sub>                | 2 | Fatty Acyls                      | Fatty acids and conjugates                   |
| 174 | Nicotinamide                           | RP-LC-<br>HRMS/MS | ESI+ | 0.9  | C <sub>6</sub> H <sub>6</sub> N <sub>2</sub> O                | 1 | Pyridines and derivatives        | Pyridinecarboxylic acids and<br>derivatives  |
| 175 | Nicotinic acid                         | HILIC-MS/MS       | ESI+ | 10.5 | C <sub>6</sub> H <sub>5</sub> NO <sub>2</sub>                 | 1 | Pyridines and derivatives        | Pyridinecarboxylic acids and<br>derivatives  |
| 176 | N-oleoyl taurine                       | RP-LC-<br>HRMS/MS | ESI- | 9.6  | C <sub>20</sub> H <sub>39</sub> NO <sub>4</sub> S             | 2 | Fatty Acyls                      | Fatty amides                                 |
| 177 | Nonanoic acid                          | GC-MS             | EI+  | 15.6 | C <sub>9</sub> H <sub>18</sub> O <sub>2</sub>                 | 2 | Fatty Acyls                      | Fatty acids and conjugates                   |



|     |                               |                   |      |      |                                                                 |   |                                             |                                              |
|-----|-------------------------------|-------------------|------|------|-----------------------------------------------------------------|---|---------------------------------------------|----------------------------------------------|
| 178 | Octadecadienoic acid          | GC-MS             | EI+  | 25.9 | C <sub>18</sub> H <sub>32</sub> O <sub>2</sub>                  | 2 | Fatty Acyls                                 | Lineolic acids and derivatives               |
| 179 | Oleic acid                    | RP-LC-<br>HRMS/MS | ESI+ | 12.9 | C <sub>18</sub> H <sub>34</sub> O <sub>2</sub>                  | 2 | Fatty Acyls                                 | Fatty acids and conjugates                   |
| 180 | Orthophosphate                | RP-LC-<br>HRMS/MS | ESI- | 0.6  | H <sub>3</sub> O <sub>4</sub> P                                 | 1 | Non-metal oxoanionic<br>compounds           | Non-metal phosphates                         |
| 181 | Palmitic acid                 | RP-LC-<br>HRMS/MS | ESI+ | 10.5 | C <sub>16</sub> H <sub>32</sub> O <sub>2</sub>                  | 2 | Fatty Acyls                                 | Fatty acids and conjugates                   |
| 182 | Palmitoylcarnitine            | RP-LC-<br>HRMS/MS | ESI+ | 7.3  | C <sub>23</sub> H <sub>46</sub> NO <sub>4</sub>                 | 2 | Fatty Acyls                                 | Fatty acid esters                            |
| 183 | Pantothenate                  | RP-LC-<br>HRMS/MS | ESI+ | 2.5  | C <sub>9</sub> H <sub>17</sub> NO <sub>5</sub>                  | 1 | Organooxygen compounds                      | Alcohols and polyols                         |
| 184 | Phenylalanine                 | HILIC-MS/MS       | ESI+ | 12.6 | C <sub>9</sub> H <sub>11</sub> NO <sub>2</sub>                  | 1 | Carboxylic acids and derivatives            | Amino acids, peptides, and<br>analogues      |
| 185 | Phosphocholine                | RP-LC-<br>HRMS/MS | ESI+ | 0.6  | C <sub>5</sub> H <sub>14</sub> NO <sub>4</sub> P                | 1 | Organic phosphoric acids and<br>derivatives | Phosphate esters                             |
| 186 | Phosphorylethanolamine        | RP-LC-<br>HRMS/MS | ESI- | 0.6  | C <sub>2</sub> H <sub>8</sub> NO <sub>4</sub> P                 | 1 | Organic phosphoric acids and<br>derivatives | Phosphate esters                             |
| 187 | Pimelic acid                  | GC-MS/MS          | EI+  | 20.5 | C <sub>7</sub> H <sub>12</sub> O <sub>4</sub>                   | 1 | Fatty Acyls                                 | Fatty acids and conjugates                   |
| 188 | Pipecolic acid                | RP-LC-<br>HRMS/MS | ESI+ | 0.5  | C <sub>6</sub> H <sub>11</sub> NO <sub>2</sub>                  | 2 | Carboxylic acids and derivatives            | Amino acids, peptides, and<br>analogues      |
| 189 | Proline                       | RP-LC-<br>HRMS/MS | ESI+ | 0.6  | C <sub>5</sub> H <sub>9</sub> NO <sub>2</sub>                   | 1 | Carboxylic acids and derivatives            | Amino acids, peptides, and<br>analogues      |
| 190 | Putrescine                    | HILIC-MS/MS       | ESI+ | 21.0 | C <sub>4</sub> H <sub>12</sub> N <sub>2</sub>                   | 1 | Organonitrogen compounds                    | Amines                                       |
| 191 | Pyridoxine                    | HILIC-MS/MS       | ESI+ | 2.0  | C <sub>8</sub> H <sub>11</sub> NO <sub>3</sub>                  | 1 | Pyridines and derivatives                   | Pyridoxines                                  |
| 192 | Pyroglutamic acid             | HILIC-MS/MS       | ESI+ | 15.0 | C <sub>5</sub> H <sub>7</sub> NO <sub>3</sub>                   | 1 | Carboxylic acids and derivatives            | Amino acids, peptides, and<br>analogues      |
| 193 | Pyruvic acid                  | GC-MS/MS          | EI+  | 6.6  | C <sub>3</sub> H <sub>4</sub> O <sub>3</sub>                    | 1 | Keto acids and derivatives                  | Alpha-keto acids and derivatives             |
| 194 | Riboflavine                   | HILIC-MS/MS       | ESI+ | 9.6  | C <sub>17</sub> H <sub>20</sub> N <sub>4</sub> O <sub>6</sub>   | 1 | Pteridines and derivatives                  | Alloxazines and isalloxazines                |
| 195 | Ribose                        | HILIC-MS/MS       | ESI- | 4.2  | C <sub>5</sub> H <sub>10</sub> O <sub>5</sub>                   | 1 | Organooxygen compounds                      | Carbohydrates and carbohydrate<br>conjugates |
| 196 | S-Adenosyl-L-<br>homocysteine | RP-LC-<br>HRMS/MS | ESI+ | 1.2  | C <sub>14</sub> H <sub>20</sub> N <sub>6</sub> O <sub>5</sub> S | 1 | Lactones                                    | Gamma butyrolactones                         |
| 197 | Serine                        | HILIC-MS/MS       | ESI+ | 17.9 | C <sub>3</sub> H <sub>7</sub> NO <sub>3</sub>                   | 1 | Carboxylic acids and derivatives            | Amino acids, peptides, and<br>analogues      |
| 198 | Stearic acid                  | GC-MS             | EI+  | 26.2 | C <sub>18</sub> H <sub>36</sub> O <sub>2</sub>                  | 2 | Fatty Acyls                                 | Fatty acids and conjugates                   |
| 199 | Succinic acid                 | RP-LC-<br>HRMS/MS | ESI+ | 1.0  | C <sub>4</sub> H <sub>6</sub> O <sub>4</sub>                    | 1 | Carboxylic acids and derivatives            | Dicarboxylic acids and derivatives           |
| 200 | Tartaric acid                 | GC-MS/MS          | EI+  | 21.8 | C <sub>4</sub> H <sub>6</sub> O <sub>6</sub>                    | 1 | Organooxygen compounds                      | Carbohydrates and carbohydrate<br>conjugates |
| 201 | Taurine                       | HILIC-MS/MS       | ESI+ | 14.4 | C <sub>2</sub> H <sub>7</sub> NO <sub>3</sub> S                 | 1 | Organic sulfonic acids and<br>derivatives   | Organosulfonic acids and<br>derivatives      |
| 202 | Taurocholic acid              | RP-LC-            | ESI- | 3.4  | C <sub>26</sub> H <sub>45</sub> NO <sub>7</sub> S               | 1 | Steroids and steroid derivatives            | Bile acids, alcohols and derivatives         |

| HRMS/MS |                            |               |      |      |                                                               |   |  |                                  |                                          |
|---------|----------------------------|---------------|------|------|---------------------------------------------------------------|---|--|----------------------------------|------------------------------------------|
| 203     | Thiamine                   | HILIC-MS/MS   | ESI+ | 11.8 | C <sub>12</sub> H <sub>17</sub> N <sub>4</sub> OS             | 1 |  | Diazines                         | Pyrimidines and pyrimidine derivatives   |
| 204     | Threonine                  | HILIC-MS/MS   | ESI+ | 10.0 | C <sub>4</sub> H <sub>9</sub> NO <sub>3</sub>                 | 1 |  | Carboxylic acids and derivatives | Amino acids, peptides, and analogues     |
| 205     | Thymidine                  | HILIC-MS/MS   | ESI+ | 1.6  | C <sub>10</sub> H <sub>14</sub> N <sub>2</sub> O <sub>5</sub> | 1 |  | Pyrimidine nucleosides           | Pyrimidine 2'-deoxyribonucleosides       |
| 206     | Thymine                    | HILIC-MS/MS   | ESI+ | 1.2  | C <sub>5</sub> H <sub>6</sub> N <sub>2</sub> O <sub>2</sub>   | 1 |  | Diazines                         | Pyrimidines and pyrimidine derivatives   |
| 207     | Trimethylamine             | HILIC-MS/MS   | ESI+ | 5.6  | C <sub>3</sub> H <sub>9</sub> N                               | 1 |  | Organonitrogen compounds         | Amines                                   |
| 208     | Trimethylamine-n-oxide     | HILIC-MS/MS   | ESI+ | 13.0 | C <sub>3</sub> H <sub>9</sub> NO                              | 1 |  | Organonitrogen compounds         | Aminoxides                               |
| 209     | Trimethyllysine (N6,N6,N6) | RP-LC-HRMS/MS | ESI+ | 0.5  | C <sub>9</sub> H <sub>20</sub> N <sub>2</sub> O <sub>2</sub>  | 2 |  | Indoles and derivatives          | Tryptamines and derivatives              |
| 210     | Tryptamine                 | HILIC-MS/MS   | ESI+ | 4.1  | C <sub>10</sub> H <sub>12</sub> N <sub>2</sub>                | 1 |  | Indoles and derivatives          | Tryptamines and derivatives              |
| 211     | Tryptophan                 | HILIC-MS/MS   | ESI+ | 12.7 | C <sub>11</sub> H <sub>12</sub> N <sub>2</sub> O <sub>2</sub> | 1 |  | Indoles and derivatives          | Indolyl carboxylic acids and derivatives |
| 212     | Tyrosine                   | HILIC-MS/MS   | ESI+ | 14.5 | C <sub>9</sub> H <sub>11</sub> NO <sub>3</sub>                | 1 |  | Carboxylic acids and derivatives | Amino acids, peptides, and analogues     |
| 213     | Uracil                     | GC-MS         | EI+  | 15.4 | C <sub>4</sub> H <sub>4</sub> N <sub>2</sub> O <sub>2</sub>   | 2 |  | Diazines                         | Pyrimidines and pyrimidine derivatives   |
| 214     | Uridine                    | RP-LC-HRMS/MS | ESI+ | 1.1  | C <sub>9</sub> H <sub>12</sub> N <sub>2</sub> O <sub>6</sub>  | 1 |  | Pyrimidine nucleosides           |                                          |
| 215     | Valine                     | GC-MS         | EI+  | 13.0 | C <sub>5</sub> H <sub>11</sub> NO <sub>2</sub>                | 2 |  | Carboxylic acids and derivatives | Amino acids, peptides, and analogues     |
| 216     | Xanthine                   | HILIC-MS/MS   | ESI+ | 7.4  | C <sub>5</sub> H <sub>4</sub> N <sub>4</sub> O <sub>2</sub>   | 1 |  | Imidazopyrimidines               | Purines and purine derivatives           |
| 217     | γ-Aminobutyric acid        | GC-MS         | EI+  | 18.1 | C <sub>4</sub> H <sub>9</sub> NO <sub>2</sub>                 | 2 |  | Carboxylic acids and derivatives | Amino acids, peptides, and analogues     |

**Table S2.** Calculated *p*-values and Log2FC values from pairwise comparisons of each treatment group G1: metronidazole; G2: probiotics; G3: fecal microbiota transplantation with either the *C. difficile* infected and untreated group G4 or the uninfected and untreated control group G5. Values highlighted in red correspond to  $p \leq 0.05$  or  $|\text{Log2FC}| \geq 1$ .

| Comparisons              | 1v4            |           | 1v5            |           | 2v4            |           | 2v5            |           | 3v4            |           | 3v5            |           | 4v5            |           |          |
|--------------------------|----------------|-----------|----------------|-----------|----------------|-----------|----------------|-----------|----------------|-----------|----------------|-----------|----------------|-----------|----------|
| Compounds                | <i>p</i> value | Log2FC    | CV%      |
| 1,5-Anhydroglucitol      | 2.52E-01       | 1.88E-01  | 6.39E-01       | -6.76E-02 | 8.40E-02       | 2.72E-01  | 9.02E-01       | 1.66E-02  | 1.36E-01       | 2.16E-01  | 7.50E-01       | -3.96E-02 | 7.40E-02       | -2.55E-01 | 6.12E+00 |
| 2,3-Butanediol           | 2.23E-02       | 1.03E-01  | 1.78E-02       | 1.03E-01  | 6.25E-01       | 3.21E-02  | 6.18E-01       | 3.22E-02  | 5.33E-01       | 3.06E-02  | 5.19E-01       | 3.07E-02  | 9.99E-01       | 7.25E-05  | 1.73E+01 |
| 2-Hydroxybutyric acid    | 7.50E-02       | -3.60E-01 | 1.87E-03       | -5.61E-01 | 1.81E-01       | -2.63E-01 | 7.54E-03       | -4.63E-01 | 2.22E-01       | 3.75E-01  | 5.25E-01       | 1.74E-01  | 2.99E-01       | -2.01E-01 | 1.92E+01 |
| 2-Ketoglutaric acid      | 1.59E-01       | 2.36E-01  | 6.10E-01       | 1.11E-01  | 2.62E-01       | 2.76E-01  | 5.86E-01       | 1.50E-01  | 4.08E-02       | 5.56E-01  | 1.35E-01       | 4.31E-01  | 5.92E-01       | -1.26E-01 | 2.35E+01 |
| 2-Hydroxyisovaleric acid | 1.51E-01       | 4.22E-01  | 6.91E-02       | -5.66E-01 | 5.69E-02       | 6.19E-01  | 2.29E-01       | -3.68E-01 | 9.90E-01       | -2.87E-03 | 2.95E-03       | -9.90E-01 | 3.86E-03       | -9.88E-01 | 1.19E+01 |

|                                 |          |           |          |           |          |           |          |           |          |           |          |           |          |           |          |
|---------------------------------|----------|-----------|----------|-----------|----------|-----------|----------|-----------|----------|-----------|----------|-----------|----------|-----------|----------|
| 3,4-Dihydroxyphenylacetic acid  | 5.81E-01 | -6.81E-02 | 5.11E-04 | -4.09E-01 | 4.61E-02 | 2.65E-01  | 4.69E-01 | -7.53E-02 | 6.52E-02 | 3.27E-01  | 9.28E-01 | -1.30E-02 | 8.29E-03 | -3.41E-01 | 1.33E+01 |
| 3-Hydroxy-3-methylglutaric acid | 3.70E-02 | -2.42E-01 | 5.93E-02 | -3.21E-01 | 6.65E-01 | 5.63E-02  | 8.93E-01 | -2.26E-02 | 4.47E-01 | 9.74E-02  | 9.10E-01 | 1.85E-02  | 6.12E-01 | -7.89E-02 | 2.04E+01 |
| 3-Hydroxybutyric acid           | 4.55E-04 | -6.97E-01 | 5.69E-06 | -5.87E-01 | 2.22E-02 | -3.91E-01 | 1.13E-02 | -2.81E-01 | 7.41E-01 | -6.76E-02 | 8.09E-01 | 4.29E-02  | 4.51E-01 | 1.10E-01  | 1.97E+01 |
| 3-Methyl-2-oxovaleric acid      | 6.29E-03 | -4.67E-01 | 1.37E-02 | -4.39E-01 | 3.70E-01 | -1.41E-01 | 4.90E-01 | -1.14E-01 | 5.82E-01 | -9.27E-02 | 7.10E-01 | -6.52E-02 | 8.80E-01 | 2.75E-02  | 1.98E+01 |
| 4-Hydroxybenzoic acid           | 4.13E-04 | 4.89E-01  | 5.33E-02 | 2.61E-01  | 4.89E-03 | 5.56E-01  | 7.68E-02 | 3.28E-01  | 5.93E-03 | 2.32E-01  | 9.67E-01 | 4.27E-03  | 4.85E-02 | -2.28E-01 | 3.07E+01 |
| 4-Hydroxyphenyllactic acid      | 1.08E-02 | 3.75E-01  | 1.99E-02 | 3.05E-01  | 1.35E-01 | 4.46E-01  | 1.87E-01 | 3.76E-01  | 3.04E-01 | 5.69E-01  | 3.53E-01 | 4.99E-01  | 6.22E-01 | -6.99E-02 | 1.05E+01 |
| 5-Hydroxyindole-3-acetic acid   | 4.66E-02 | -2.32E-01 | 3.91E-04 | -3.87E-01 | 3.08E-01 | 1.54E-01  | 9.98E-01 | -3.11E-04 | 1.00E-02 | 3.10E-01  | 1.10E-01 | 1.56E-01  | 1.90E-01 | -1.54E-01 | 1.89E+01 |
| 5-Methylthioadenosine           | 3.91E-03 | 2.75E-01  | 3.31E-07 | 7.58E-01  | 1.78E-01 | 1.25E-01  | 1.55E-05 | 6.07E-01  | 1.30E-01 | 2.47E-01  | 8.31E-04 | 7.29E-01  | 1.90E-04 | 4.82E-01  | 5.61E+00 |
| Acetylcarnitine                 | 1.83E-06 | -4.11E-01 | 2.97E-02 | -1.25E-01 | 2.58E-04 | -2.97E-01 | 8.55E-01 | -1.15E-02 | 9.12E-02 | -1.35E-01 | 6.32E-02 | 1.50E-01  | 3.74E-04 | 2.86E-01  | 5.86E+00 |
| Aconitic acid                   | 2.85E-01 | 1.48E-01  | 7.91E-01 | -4.41E-02 | 3.75E-02 | 4.30E-01  | 2.58E-01 | 2.38E-01  | 1.89E-01 | 1.76E-01  | 9.20E-01 | -1.62E-02 | 2.83E-01 | -1.92E-01 | 6.83E+00 |
| Adenosine                       | 3.82E-02 | -6.62E-01 | 8.22E-01 | -8.03E-02 | 8.93E-01 | 3.00E-02  | 2.75E-02 | 6.11E-01  | 4.05E-01 | -2.55E-01 | 3.71E-01 | 3.26E-01  | 4.55E-02 | 5.81E-01  | 3.88E+00 |
| Adenosine monophosphate         | 2.57E-01 | 7.23E-02  | 1.80E-02 | 2.30E-01  | 8.27E-01 | 2.21E-02  | 1.56E-01 | 1.80E-01  | 9.80E-01 | 3.18E-03  | 2.85E-01 | 1.61E-01  | 7.85E-02 | 1.58E-01  | 1.85E+00 |
| Adrenic acid                    | 1.88E-01 | 1.30E-01  | 3.12E-01 | -1.18E-01 | 4.52E-01 | 4.60E-02  | 4.29E-02 | -2.03E-01 | 2.73E-01 | 9.33E-02  | 1.59E-01 | -1.55E-01 | 2.62E-02 | -2.49E-01 | 1.60E+00 |
| Alanine                         | 2.60E-02 | 8.57E-01  | 4.52E-03 | -2.30E+00 | 1.96E-02 | 1.24E+00  | 8.67E-03 | -1.93E+00 | 2.30E-02 | 1.69E+00  | 2.55E-02 | -1.47E+00 | 1.89E-03 | -3.16E+00 | 2.77E+00 |
| alpha-D-Lyxopyranose            | 1.86E-02 | -1.90E-01 | 7.38E-03 | -2.62E-01 | 6.82E-01 | 6.43E-02  | 9.64E-01 | -7.17E-03 | 4.82E-01 | 9.78E-02  | 8.53E-01 | 2.63E-02  | 2.72E-01 | -7.15E-02 | 1.39E+01 |
| alpha-Linolenic acid            | 1.75E-01 | 1.06E-01  | 8.52E-01 | -1.24E-02 | 2.88E-02 | 2.41E-01  | 2.04E-01 | 1.23E-01  | 2.63E-01 | 1.04E-01  | 8.67E-01 | -1.39E-02 | 6.09E-02 | -1.18E-01 | 2.49E+00 |
| alpha-Tocopherol                | 1.86E-01 | -1.05E-01 | 4.53E-01 | -5.62E-02 | 3.84E-01 | 1.02E-01  | 2.03E-01 | 1.50E-01  | 2.65E-01 | 1.58E-01  | 1.52E-01 | 2.07E-01  | 5.29E-01 | 4.85E-02  | 6.78E+00 |
| Arabinitol                      | 8.73E-01 | 1.22E-02  | 6.98E-01 | -2.91E-02 | 4.07E-01 | 9.98E-02  | 6.19E-01 | 5.85E-02  | 3.59E-01 | 8.59E-02  | 6.26E-01 | 4.46E-02  | 4.76E-01 | -4.13E-02 | 4.17E+00 |
| Arachidonic acid                | 3.34E-03 | -1.86E-01 | 5.48E-04 | -2.55E-01 | 5.45E-01 | -4.92E-02 | 1.69E-01 | -1.18E-01 | 5.03E-01 | 5.55E-02  | 8.73E-01 | -1.35E-02 | 2.80E-01 | -6.90E-02 | 1.07E+00 |
| Arachidonoylcarnitine           | 9.19E-05 | 3.49E-01  | 1.50E-01 | 1.17E-01  | 7.64E-03 | 2.47E-01  | 8.72E-01 | 1.44E-02  | 3.36E-02 | 2.70E-01  | 7.52E-01 | 3.77E-02  | 2.39E-02 | -2.33E-01 | 4.05E+00 |
| Arginine                        | 1.16E-01 | -1.33E-01 | 4.17E-05 | -3.13E-01 | 3.61E-02 | -1.90E-01 | 1.08E-05 | -3.70E-01 | 2.02E-01 | -9.36E-02 | 1.36E-05 | -2.74E-01 | 9.88E-03 | -1.80E-01 | 3.64E+00 |
| Asparagine                      | 1.69E-02 | 9.06E-01  | 2.86E-02 | -3.25E+00 | 2.72E-02 | 1.48E+00  | 3.87E-02 | -2.67E+00 | 4.15E-02 | 2.38E+00  | 8.70E-02 | -1.77E+00 | 2.18E-02 | -4.15E+00 | 1.40E+01 |
| Aspartic acid                   | 2.94E-02 | -8.60E-02 | 2.18E-05 | -1.89E-01 | 1.49E-01 | -6.86E-02 | 7.73E-04 | -1.71E-01 | 8.39E-02 | -9.20E-02 | 6.35E-04 | -1.95E-01 | 1.97E-02 | -1.03E-01 | 3.82E+00 |
| Azelaic acid                    | 8.71E-01 | 2.27E-02  | 1.50E-01 | 1.80E-01  | 4.74E-02 | 3.07E-01  | 2.55E-03 | 4.64E-01  | 5.02E-02 | 2.43E-01  | 5.54E-04 | 4.01E-01  | 2.78E-01 | 1.57E-01  | 1.11E+01 |
| Benzoic acid                    | 1.23E-01 | -2.02E-01 | 1.04E-02 | -2.41E-01 | 9.18E-01 | 1.43E-02  | 8.18E-01 | -2.50E-02 | 6.12E-01 | 9.28E-02  | 7.39E-01 | 5.34E-02  | 7.62E-01 | -3.94E-02 | 9.86E+00 |
| beta-Arabinopyranose            | 7.59E-02 | 3.12E-01  | 9.07E-01 | 2.89E-02  | 2.00E-01 | 4.65E-01  | 6.25E-01 | 1.82E-01  | 7.78E-01 | 5.06E-02  | 3.90E-01 | -2.33E-01 | 2.29E-01 | -2.83E-01 | 4.77E+00 |
| Betaine                         | 8.41E-01 | 3.03E-02  | 1.61E-03 | -7.14E-01 | 3.56E-01 | -1.32E-01 | 2.79E-04 | -8.76E-01 | 2.96E-01 | 2.65E-01  | 5.96E-02 | -4.79E-01 | 1.42E-03 | -7.44E-01 | 7.26E+00 |
| Carnitine                       | 4.22E-06 | 1.43E-01  | 3.88E-05 | 1.18E-01  | 2.84E-01 | 3.61E-02  | 7.35E-01 | 1.11E-02  | 1.67E-01 | 6.64E-02  | 3.77E-01 | 4.14E-02  | 2.93E-01 | -2.50E-02 | 2.92E+00 |
| Cholesterol                     | 1.10E-01 | 9.04E-02  | 2.36E-02 | 1.37E-01  | 1.80E-01 | 7.58E-02  | 4.24E-02 | 1.22E-01  | 9.21E-01 | 7.16E-03  | 4.73E-01 | 5.36E-02  | 3.52E-01 | 4.64E-02  | 4.23E+00 |
| Choline                         | 5.07E-01 | 6.65E-02  | 3.69E-02 | -3.02E-01 | 2.29E-01 | 1.36E-01  | 1.10E-01 | -2.33E-01 | 5.18E-01 | 1.40E-01  | 2.94E-01 | -2.29E-01 | 1.74E-02 | -3.69E-01 | 2.20E+00 |
| Citramalic acid                 | 9.29E-01 | 1.15E-02  | 3.92E-02 | -3.59E-01 | 1.31E-02 | 3.66E-01  | 9.75E-01 | -4.96E-03 | 1.26E-01 | 2.38E-01  | 4.43E-01 | -1.33E-01 | 2.81E-02 | -3.71E-01 | 1.89E+01 |
| Citric acid                     | 7.48E-01 | 5.04E-02  | 1.01E-02 | -3.88E-01 | 1.96E-02 | 3.80E-01  | 6.58E-01 | -5.84E-02 | 1.48E-01 | 2.28E-01  | 1.29E-01 | -2.10E-01 | 4.16E-03 | -4.38E-01 | 6.09E+00 |
| Citrulline                      | 2.21E-01 | -1.67E-01 | 9.64E-03 | -3.60E-01 | 1.14E-02 | -3.69E-01 | 2.43E-04 | -5.61E-01 | 3.75E-01 | -1.17E-01 | 1.97E-02 | -3.09E-01 | 1.66E-01 | -1.92E-01 | 8.49E+00 |
| Creatine                        | 1.77E-04 | 1.71E+00  | 1.54E-02 | -1.32E+00 | 5.26E-04 | 1.80E+00  | 2.13E-02 | -1.23E+00 | 8.54E-03 | 2.14E+00  | 9.15E-02 | -8.88E-01 | 7.91E-04 | -3.02E+00 | 2.46E+00 |

|  |                        |          |           |          |           |          |           |          |           |          |           |          |           |          |           |          |
|--|------------------------|----------|-----------|----------|-----------|----------|-----------|----------|-----------|----------|-----------|----------|-----------|----------|-----------|----------|
|  | Creatinine             | 5.08E-01 | 1.26E-01  | 5.93E-03 | -8.13E-01 | 2.72E-01 | 2.45E-01  | 1.76E-02 | -6.94E-01 | 1.60E-01 | 4.50E-01  | 1.20E-01 | -4.89E-01 | 3.70E-03 | -9.40E-01 | 4.78E+00 |
|  | Cysteine               | 9.78E-01 | -2.53E-03 | 6.51E-01 | 4.37E-02  | 1.51E-01 | 2.17E-01  | 9.44E-02 | 2.63E-01  | 6.22E-01 | 4.61E-02  | 3.54E-01 | 9.23E-02  | 5.42E-01 | 4.62E-02  | 1.37E+01 |
|  | Cytidine               | 2.34E-01 | 1.60E-01  | 2.58E-04 | 5.93E-01  | 8.34E-01 | 2.78E-02  | 2.22E-03 | 4.60E-01  | 3.81E-01 | 1.13E-01  | 3.44E-04 | 5.45E-01  | 1.22E-02 | 4.32E-01  | 4.66E+00 |
|  | Cytidine monophosphate | 9.03E-01 | 1.19E-02  | 6.12E-02 | -1.83E-01 | 6.41E-01 | -3.72E-02 | 6.80E-03 | -2.32E-01 | 6.65E-01 | 4.26E-02  | 1.17E-01 | -1.53E-01 | 4.98E-02 | -1.95E-01 | 5.07E+00 |
|  | Cytosine               | 3.19E-01 | 1.25E-01  | 6.44E-04 | 5.33E-01  | 8.75E-01 | 1.93E-02  | 3.60E-03 | 4.27E-01  | 4.36E-01 | 8.95E-02  | 5.05E-04 | 4.98E-01  | 8.59E-03 | 4.08E-01  | 9.12E+00 |
|  | D-Erythrose            | 3.56E-03 | -3.02E-01 | 9.15E-01 | 2.03E-02  | 8.76E-03 | -1.87E-01 | 4.34E-01 | 1.35E-01  | 2.35E-03 | -1.80E-01 | 3.92E-01 | 1.43E-01  | 3.93E-02 | 3.22E-01  | 8.47E+00 |
|  | D-Fructose             | 3.70E-03 | 4.96E-01  | 4.15E-01 | 1.32E-01  | 7.78E-02 | 2.92E-01  | 6.70E-01 | -7.23E-02 | 3.21E-01 | 1.62E-01  | 2.53E-01 | -2.02E-01 | 4.87E-02 | -3.64E-01 | 3.86E+00 |
|  | D-Fucitol              | 2.94E-01 | -4.90E-02 | 1.25E-02 | -2.33E-01 | 5.38E-01 | 3.34E-02  | 9.79E-02 | -1.51E-01 | 4.45E-01 | 3.01E-02  | 6.80E-02 | -1.54E-01 | 3.05E-02 | -1.84E-01 | 8.62E+00 |
|  | D-Glucose              | 9.50E-01 | -6.29E-03 | 3.47E-01 | -1.11E-01 | 6.17E-01 | 9.84E-02  | 9.76E-01 | -6.11E-03 | 6.74E-01 | 7.37E-02  | 8.63E-01 | -3.09E-02 | 2.93E-01 | -1.05E-01 | 1.17E+01 |
|  | Dimethylamine          | 1.33E-03 | -4.93E-01 | 8.02E-05 | -7.54E-01 | 1.65E-02 | -3.83E-01 | 7.13E-04 | -6.44E-01 | 4.45E-01 | 1.33E-01  | 4.75E-01 | -1.27E-01 | 1.03E-01 | -2.61E-01 | 1.79E+01 |
|  | D-Lyxose               | 3.84E-01 | 3.54E-02  | 1.22E-01 | -2.14E-01 | 9.99E-01 | -6.62E-05 | 8.67E-02 | -2.49E-01 | 8.02E-01 | 1.79E-02  | 1.22E-01 | -2.31E-01 | 8.43E-02 | -2.49E-01 | 4.91E+00 |
|  | D-Mannitol             | 6.00E-01 | 4.10E-02  | 6.76E-01 | -4.64E-02 | 1.21E-01 | 1.82E-01  | 4.84E-01 | 9.48E-02  | 5.07E-01 | 5.84E-02  | 8.04E-01 | -2.91E-02 | 4.48E-01 | -8.74E-02 | 4.18E+00 |
|  | Docosahexaenoic acid   | 2.61E-01 | 3.58E-02  | 2.31E-02 | -8.78E-02 | 1.38E-01 | 3.44E-02  | 6.20E-03 | -8.92E-02 | 4.09E-01 | 2.65E-02  | 1.43E-02 | -9.71E-02 | 1.38E-03 | -1.24E-01 | 7.27E-01 |
|  | Docosapentaenoic acid  | 2.02E-03 | 2.92E-01  | 2.26E-01 | -1.06E-01 | 3.18E-03 | 2.05E-01  | 1.40E-02 | -1.94E-01 | 5.22E-01 | 4.90E-02  | 5.01E-04 | -3.50E-01 | 2.40E-05 | -3.99E-01 | 1.76E+00 |
|  | Docosenamide           | 3.21E-02 | 4.31E-01  | 2.52E-01 | 2.24E-01  | 5.04E-01 | 1.10E-01  | 5.80E-01 | -9.73E-02 | 1.28E-01 | 2.95E-01  | 6.49E-01 | 8.79E-02  | 1.58E-01 | -2.07E-01 | 1.18E+00 |
|  | Eicosapentaenoic acid  | 6.17E-03 | 3.21E-01  | 4.27E-01 | -7.75E-02 | 2.10E-02 | 2.40E-01  | 8.84E-02 | -1.59E-01 | 2.38E-01 | 1.09E-01  | 2.87E-03 | -2.90E-01 | 2.62E-05 | -3.99E-01 | 2.65E+00 |
|  | Eicosatrienoic acid    | 6.91E-04 | 4.32E-01  | 7.41E-01 | 3.50E-02  | 3.90E-02 | 2.46E-01  | 1.80E-01 | -1.52E-01 | 1.00E+00 | 6.18E-05  | 1.95E-03 | -3.97E-01 | 6.21E-04 | -3.97E-01 | 3.18E+00 |
|  | Ethanolamine           | 9.63E-01 | 2.91E-03  | 5.24E-01 | -4.29E-02 | 6.11E-01 | 4.66E-02  | 9.93E-01 | 8.15E-04  | 4.33E-01 | -5.76E-02 | 1.87E-01 | -1.03E-01 | 4.85E-01 | -4.58E-02 | 1.82E+01 |
|  | Fumaric acid           | 7.10E-01 | -6.06E-02 | 2.40E-02 | -3.93E-01 | 5.38E-01 | -1.05E-01 | 1.64E-02 | -4.37E-01 | 6.41E-01 | 8.75E-02  | 1.86E-01 | -2.45E-01 | 8.71E-02 | -3.32E-01 | 1.02E+01 |
|  | Galactose              | 2.56E-02 | 8.23E-01  | 4.59E-01 | 2.46E-01  | 1.91E-01 | 3.38E-01  | 4.08E-01 | -2.39E-01 | 1.33E-01 | 5.50E-01  | 9.38E-01 | -2.70E-02 | 3.98E-02 | -5.77E-01 | 3.02E+00 |
|  | Glutamic acid          | 3.64E-02 | 9.92E-02  | 1.60E-03 | 1.37E-01  | 7.73E-03 | 1.16E-01  | 8.86E-05 | 1.54E-01  | 6.97E-02 | 8.23E-02  | 3.21E-03 | 1.20E-01  | 3.53E-01 | 3.82E-02  | 3.34E+00 |
|  | Glutamine              | 1.93E-02 | 1.40E+00  | 1.42E-02 | -2.58E+00 | 1.14E-02 | 2.14E+00  | 3.38E-02 | -1.84E+00 | 2.93E-02 | 3.01E+00  | 1.89E-01 | -9.67E-01 | 6.58E-03 | -3.98E+00 | 3.14E+00 |
|  | Glutaric acid          | 2.47E-01 | -5.89E-02 | 4.04E-01 | 4.10E-02  | 7.85E-01 | -2.15E-02 | 3.32E-01 | 7.84E-02  | 7.79E-01 | 1.77E-02  | 7.57E-02 | 1.18E-01  | 4.82E-02 | 9.99E-02  | 4.91E+00 |
|  | Glyceric acid          | 5.54E-02 | 2.79E-01  | 7.53E-02 | -1.33E+00 | 8.88E-03 | 4.31E-01  | 9.79E-02 | -1.18E+00 | 1.25E-02 | 6.45E-01  | 1.50E-01 | -9.65E-01 | 4.89E-02 | -1.61E+00 | 1.57E+01 |
|  | Glycerol               | 5.58E-01 | -4.19E-02 | 2.16E-03 | -1.92E-01 | 4.77E-01 | -5.81E-02 | 4.80E-03 | -2.08E-01 | 8.47E-01 | -1.32E-02 | 4.72E-03 | -1.63E-01 | 1.67E-02 | -1.50E-01 | 1.34E+01 |
|  | Glycine                | 3.90E-02 | 1.03E+00  | 8.39E-03 | -2.68E+00 | 3.18E-02 | 1.51E+00  | 1.44E-02 | -2.21E+00 | 4.66E-02 | 2.01E+00  | 3.42E-02 | -1.71E+00 | 4.42E-03 | -3.71E+00 | 6.92E+00 |
|  | Glycolic acid          | 1.95E-01 | -2.22E-01 | 4.56E-02 | -1.38E+00 | 7.07E-01 | -5.81E-02 | 6.23E-02 | -1.22E+00 | 7.18E-01 | 6.82E-02  | 8.31E-02 | -1.09E+00 | 7.29E-02 | -1.16E+00 | 1.98E+01 |
|  | Guanosine              | 3.28E-02 | 2.23E-01  | 1.30E-03 | 2.83E-01  | 4.94E-01 | 8.26E-02  | 1.71E-01 | 1.42E-01  | 1.31E-01 | 2.16E-01  | 3.85E-02 | 2.75E-01  | 5.92E-01 | 5.96E-02  | 1.55E+01 |
|  | Histamine              | 2.59E-01 | -1.87E-01 | 4.32E-03 | -1.35E+00 | 2.61E-01 | 2.56E-01  | 2.78E-02 | -9.09E-01 | 7.96E-02 | 4.54E-01  | 6.89E-02 | -7.11E-01 | 8.56E-03 | -1.16E+00 | 1.48E+01 |
|  | Histidine              | 7.42E-01 | 1.98E-02  | 4.78E-03 | -1.98E-01 | 1.74E-01 | -9.24E-02 | 2.02E-04 | -3.10E-01 | 9.07E-01 | 8.10E-03  | 7.00E-03 | -2.10E-01 | 3.77E-03 | -2.18E-01 | 6.86E+00 |
|  | Homovallinic acid      | 1.40E-01 | -1.73E-01 | 3.19E-02 | -2.28E-01 | 2.37E-01 | 1.33E-01  | 4.28E-01 | 7.85E-02  | 1.15E-01 | 2.10E-01  | 1.98E-01 | 1.55E-01  | 5.11E-01 | -5.46E-02 | 7.20E+00 |
|  | Hypoxanthine           | 1.14E-01 | 2.08E-01  | 3.20E-02 | -3.98E-01 | 3.32E-02 | 2.98E-01  | 8.74E-02 | -3.07E-01 | 2.04E-01 | 2.88E-01  | 1.70E-01 | -3.18E-01 | 4.22E-03 | -6.06E-01 | 3.99E+00 |
|  | Inosine                | 1.07E-03 | 1.70E-01  | 1.84E-07 | 3.29E-01  | 1.01E-01 | 8.37E-02  | 4.74E-05 | 2.43E-01  | 3.60E-02 | 1.62E-01  | 3.06E-04 | 3.22E-01  | 3.95E-03 | 1.60E-01  | 4.01E+00 |
|  | Isoleucine             | 1.07E-01 | 5.36E-01  | 3.07E-03 | -1.71E+00 | 7.32E-02 | 6.61E-01  | 4.52E-03 | -1.58E+00 | 3.66E-02 | 1.05E+00  | 1.95E-02 | -1.19E+00 | 9.57E-04 | -2.25E+00 | 7.30E+00 |

|               |          |           |          |           |          |           |          |           |          |           |          |           |          |           |          |
|---------------|----------|-----------|----------|-----------|----------|-----------|----------|-----------|----------|-----------|----------|-----------|----------|-----------|----------|
| Lactic acid   | 1.33E-01 | -1.59E-01 | 7.66E-05 | -4.04E-01 | 3.05E-01 | -1.03E-01 | 2.41E-04 | -3.48E-01 | 7.94E-01 | 3.01E-02  | 3.47E-02 | -2.15E-01 | 3.17E-02 | -2.45E-01 | 1.19E+01 |
| Leucine       | 1.03E-01 | 4.93E-01  | 2.10E-03 | -1.52E+00 | 7.83E-02 | 5.71E-01  | 2.88E-03 | -1.44E+00 | 3.79E-02 | 9.37E-01  | 1.67E-02 | -1.08E+00 | 5.18E-04 | -2.02E+00 | 3.10E+00 |
| LPC 14:0 sn-1 | 4.60E-01 | 8.99E-02  | 5.13E-02 | 2.06E-01  | 7.06E-01 | 3.55E-02  | 1.82E-02 | 1.52E-01  | 9.69E-01 | 4.48E-03  | 2.00E-01 | 1.21E-01  | 2.17E-01 | 1.16E-01  | 3.77E+00 |
| LPC 14:0 sn-2 | 5.67E-01 | 6.01E-02  | 4.85E-02 | 1.85E-01  | 7.16E-01 | 3.06E-02  | 1.62E-02 | 1.56E-01  | 4.44E-01 | -7.18E-02 | 4.55E-01 | 5.34E-02  | 1.23E-01 | 1.25E-01  | 5.83E+00 |
| LPC 16:0 sn-1 | 6.69E-01 | 2.65E-02  | 1.30E-01 | 8.34E-02  | 5.75E-01 | -3.22E-02 | 6.01E-01 | 2.47E-02  | 9.65E-01 | -2.71E-03 | 3.11E-01 | 5.42E-02  | 3.01E-01 | 5.69E-02  | 6.21E+00 |
| LPC 16:0 sn-2 | 9.26E-01 | -3.48E-03 | 8.34E-01 | 5.70E-03  | 2.82E-01 | 3.65E-02  | 4.34E-02 | 4.57E-02  | 7.82E-01 | -1.04E-02 | 9.65E-01 | -1.20E-03 | 7.89E-01 | 9.18E-03  | 4.63E+00 |
| LPC 16:1 sn-1 | 2.47E-01 | 1.39E-01  | 7.34E-01 | -3.55E-02 | 4.43E-01 | 7.49E-02  | 2.41E-01 | -9.93E-02 | 6.30E-01 | 6.50E-02  | 3.73E-01 | -1.09E-01 | 1.34E-01 | -1.74E-01 | 3.87E+00 |
| LPC 16:1 sn-2 | 1.29E-01 | 1.43E-01  | 8.51E-01 | -1.34E-02 | 1.28E-01 | 1.11E-01  | 3.36E-01 | -4.49E-02 | 3.24E-01 | 1.19E-01  | 7.15E-01 | -3.72E-02 | 2.80E-02 | -1.56E-01 | 4.14E+00 |
| LPC 18:0 sn-1 | 7.76E-01 | -1.21E-02 | 2.70E-01 | 4.47E-02  | 2.10E-01 | -4.74E-02 | 7.80E-01 | 9.35E-03  | 2.44E-01 | -5.93E-02 | 9.58E-01 | -2.55E-03 | 2.04E-01 | 5.67E-02  | 9.41E+00 |
| LPC 18:0 sn-2 | 7.35E-01 | 2.95E-02  | 8.16E-01 | 1.57E-02  | 6.53E-01 | 3.27E-02  | 6.93E-01 | 1.90E-02  | 6.75E-01 | 3.84E-02  | 7.36E-01 | 2.46E-02  | 8.54E-01 | -1.37E-02 | 2.41E+00 |
| LPC 18:1 sn-1 | 9.66E-01 | 1.82E-03  | 6.35E-01 | 1.78E-02  | 9.14E-01 | -4.36E-03 | 7.41E-01 | 1.16E-02  | 7.48E-01 | -1.32E-02 | 9.39E-01 | 2.78E-03  | 6.86E-01 | 1.60E-02  | 6.88E+00 |
| LPC 18:1 sn-2 | 5.40E-01 | 3.10E-02  | 4.32E-01 | 3.17E-02  | 5.14E-01 | 2.67E-02  | 3.14E-01 | 2.74E-02  | 7.19E-01 | 2.12E-02  | 6.64E-01 | 2.19E-02  | 9.87E-01 | 6.89E-04  | 1.13E+00 |
| LPC 18:2 sn-1 | 5.94E-01 | 6.21E-02  | 4.71E-01 | 6.62E-02  | 6.23E-01 | 4.50E-02  | 3.79E-01 | 4.91E-02  | 5.80E-01 | 6.84E-02  | 4.72E-01 | 7.26E-02  | 9.64E-01 | 4.11E-03  | 4.15E+00 |
| LPC 18:2 sn-2 | 7.08E-01 | 3.29E-02  | 4.74E-01 | 5.68E-02  | 3.29E-01 | 6.37E-02  | 1.02E-01 | 8.76E-02  | 6.01E-01 | 5.17E-02  | 4.11E-01 | 7.56E-02  | 7.17E-01 | 2.39E-02  | 3.50E+00 |
| LPC 20:0 sn-1 | 6.76E-01 | 3.36E-02  | 4.35E-01 | 5.49E-02  | 6.22E-01 | -3.94E-02 | 7.92E-01 | -1.81E-02 | 4.15E-01 | -8.78E-02 | 5.04E-01 | -6.65E-02 | 7.37E-01 | 2.13E-02  | 2.94E+00 |
| LPC 20:0 sn-2 | 7.01E-01 | 3.26E-02  | 2.63E-01 | 1.09E-01  | 9.20E-01 | -7.98E-03 | 4.54E-01 | 6.87E-02  | 2.47E-01 | -1.20E-01 | 7.03E-01 | -4.31E-02 | 3.51E-01 | 7.67E-02  | 4.22E+00 |
| LPC 20:1 sn-1 | 9.87E-01 | -1.67E-03 | 9.88E-01 | -1.23E-03 | 7.35E-01 | -3.17E-02 | 6.43E-01 | -3.12E-02 | 9.35E-01 | -9.81E-03 | 9.26E-01 | -9.37E-03 | 9.96E-01 | 4.39E-04  | 3.29E+00 |
| LPC 20:1 sn-2 | 9.28E-01 | 7.83E-03  | 3.85E-01 | -6.89E-02 | 7.34E-01 | -2.47E-02 | 1.24E-01 | -1.01E-01 | 9.02E-01 | 1.37E-02  | 5.49E-01 | -6.30E-02 | 2.74E-01 | -7.67E-02 | 1.81E+00 |
| LPC 20:4 sn-1 | 4.04E-01 | 6.36E-02  | 1.24E-01 | 8.98E-02  | 5.56E-01 | 3.73E-02  | 9.74E-02 | 6.34E-02  | 5.14E-01 | 4.80E-02  | 1.71E-01 | 7.42E-02  | 6.80E-01 | 2.61E-02  | 1.80E+00 |
| LPC 20:4 sn-2 | 3.39E-01 | 8.17E-02  | 7.41E-02 | 1.44E-01  | 2.90E-01 | 6.55E-02  | 1.59E-02 | 1.28E-01  | 5.34E-01 | 5.43E-02  | 1.55E-01 | 1.16E-01  | 3.67E-01 | 6.21E-02  | 2.16E+00 |
| LPC 20:5 sn-1 | 8.56E-03 | 3.95E-01  | 2.62E-01 | 1.37E-01  | 1.83E-01 | 1.57E-01  | 3.19E-01 | -1.00E-01 | 8.41E-01 | 2.35E-02  | 2.99E-02 | -2.34E-01 | 4.20E-02 | -2.57E-01 | 7.57E+00 |
| LPC 20:5 sn-2 | 9.00E-04 | 4.22E-01  | 1.15E-01 | 1.59E-01  | 1.06E-01 | 1.86E-01  | 4.51E-01 | -7.60E-02 | 9.78E-01 | 4.16E-03  | 6.98E-02 | -2.58E-01 | 4.64E-03 | -2.62E-01 | 1.49E+01 |
| LPC 22:4 sn-1 | 5.05E-01 | 8.18E-02  | 2.71E-01 | 1.17E-01  | 9.84E-01 | 2.01E-03  | 6.10E-01 | 3.71E-02  | 5.12E-01 | 8.42E-02  | 2.89E-01 | 1.19E-01  | 7.38E-01 | 3.51E-02  | 4.32E+00 |
| LPC 22:4 sn-2 | 8.70E-01 | 1.56E-02  | 3.77E-01 | 7.62E-02  | 9.70E-01 | -2.68E-03 | 3.09E-01 | 5.79E-02  | 6.67E-01 | 4.64E-02  | 2.89E-01 | 1.07E-01  | 4.64E-01 | 6.06E-02  | 2.90E+00 |
| LPC 22:6 sn-1 | 3.73E-01 | 5.45E-02  | 3.83E-01 | 3.44E-02  | 7.91E-01 | -1.58E-02 | 3.28E-01 | -3.59E-02 | 9.71E-01 | 2.52E-03  | 7.24E-01 | -1.76E-02 | 7.01E-01 | -2.01E-02 | 7.12E+00 |
| LPC 22:6 sn-2 | 4.31E-01 | 5.50E-02  | 4.54E-01 | 4.06E-02  | 3.15E-01 | 6.05E-02  | 2.63E-01 | 4.61E-02  | 6.09E-01 | 4.28E-02  | 6.88E-01 | 2.84E-02  | 8.13E-01 | -1.44E-02 | 1.85E+00 |
| LPE 16:0 sn-1 | 5.45E-01 | 2.77E-02  | 4.90E-01 | 2.79E-02  | 4.51E-01 | 3.33E-02  | 3.85E-01 | 3.35E-02  | 6.49E-01 | 2.09E-02  | 6.03E-01 | 2.11E-02  | 9.97E-01 | 1.90E-04  | 4.27E+00 |
| LPE 16:0 sn-2 | 8.52E-01 | -1.30E-02 | 6.64E-01 | 4.23E-02  | 8.75E-01 | -9.02E-03 | 6.02E-01 | 4.62E-02  | 6.31E-01 | 3.39E-02  | 3.64E-01 | 8.91E-02  | 5.69E-01 | 5.52E-02  | 1.83E+00 |
| LPE 16:1 sn-1 | 2.95E-01 | 1.21E-01  | 7.33E-01 | 3.36E-02  | 4.66E-01 | 7.78E-02  | 9.15E-01 | -9.50E-03 | 4.93E-01 | 8.60E-02  | 9.91E-01 | -1.27E-03 | 4.78E-01 | -8.73E-02 | 4.66E+00 |
| LPE 16:1 sn-2 | 7.76E-01 | -2.68E-02 | 5.55E-02 | -2.24E-01 | 7.91E-01 | 2.22E-02  | 1.02E-01 | -1.75E-01 | 4.24E-01 | 1.05E-01  | 5.08E-01 | -9.21E-02 | 8.74E-02 | -1.98E-01 | 3.25E+00 |
| LPE 18:0 sn-1 | 9.65E-01 | 2.11E-03  | 1.36E-01 | 6.40E-02  | 9.34E-01 | 3.51E-03  | 6.79E-02 | 6.54E-02  | 8.55E-01 | 8.14E-03  | 7.28E-02 | 7.01E-02  | 1.95E-01 | 6.19E-02  | 2.01E+00 |
| LPE 18:0 sn-2 | 6.50E-01 | 3.90E-02  | 1.60E-01 | 1.19E-01  | 6.73E-01 | 3.41E-02  | 1.49E-01 | 1.14E-01  | 7.44E-01 | 2.78E-02  | 1.98E-01 | 1.08E-01  | 4.58E-01 | 8.01E-02  | 1.98E+00 |
| LPE 18:1 sn-1 | 5.42E-01 | 3.48E-02  | 9.26E-01 | -5.21E-03 | 6.89E-01 | 2.20E-02  | 7.42E-01 | -1.79E-02 | 6.64E-01 | 2.73E-02  | 8.37E-01 | -1.27E-02 | 5.64E-01 | -4.00E-02 | 2.08E+00 |
| LPE 18:1 sn-2 | 3.33E-01 | -5.45E-02 | 1.97E-01 | -1.03E-01 | 2.67E-01 | -5.40E-02 | 1.71E-01 | -1.02E-01 | 6.25E-01 | 3.14E-02  | 8.38E-01 | -1.69E-02 | 5.20E-01 | -4.84E-02 | 1.26E+00 |

|               |          |           |          |           |          |           |          |           |          |           |          |           |          |           |          |
|---------------|----------|-----------|----------|-----------|----------|-----------|----------|-----------|----------|-----------|----------|-----------|----------|-----------|----------|
| LPE 18:2 sn-1 | 6.64E-01 | 4.14E-02  | 3.83E-01 | 7.63E-02  | 4.89E-01 | 5.74E-02  | 2.10E-01 | 9.22E-02  | 4.93E-01 | 6.64E-02  | 2.59E-01 | 1.01E-01  | 7.19E-01 | 3.49E-02  | 3.64E+00 |
| LPE 18:2 sn-2 | 9.81E-01 | -1.77E-03 | 7.94E-01 | 2.36E-02  | 2.97E-01 | 6.19E-02  | 2.64E-01 | 8.72E-02  | 2.74E-01 | 8.78E-02  | 2.34E-01 | 1.13E-01  | 7.65E-01 | 2.54E-02  | 3.06E+00 |
| LPE 20:1 sn-1 | 6.54E-01 | 7.49E-02  | 4.47E-01 | -1.14E-01 | 6.99E-01 | 6.16E-02  | 3.71E-01 | -1.27E-01 | 8.33E-01 | 3.71E-02  | 3.42E-01 | -1.52E-01 | 2.78E-01 | -1.89E-01 | 2.16E+00 |
| LPE 20:1 sn-2 | 3.35E-01 | -7.96E-02 | 1.89E-01 | -1.50E-01 | 2.04E-01 | -1.02E-01 | 1.29E-01 | -1.72E-01 | 8.33E-01 | 1.75E-02  | 6.35E-01 | -5.26E-02 | 5.02E-01 | -7.01E-02 | 1.32E+00 |
| LPE 20:2 sn-1 | 1.81E-01 | -1.41E-01 | 1.67E-01 | -1.90E-01 | 2.01E-01 | -1.31E-01 | 1.82E-01 | -1.81E-01 | 9.27E-01 | 1.21E-02  | 8.09E-01 | -3.73E-02 | 7.07E-01 | -4.94E-02 | 3.34E+00 |
| LPE 20:2 sn-2 | 2.86E-01 | -1.15E-01 | 3.45E-02 | 3.27E-01  | 1.69E-01 | -1.33E-01 | 3.12E-02 | 3.09E-01  | 1.70E-01 | -1.63E-01 | 8.56E-02 | 2.79E-01  | 2.73E-03 | 4.42E-01  | 3.75E+00 |
| LPE 20:4 sn-1 | 5.49E-01 | 3.36E-02  | 1.46E-01 | 9.72E-02  | 5.04E-01 | 3.24E-02  | 1.11E-01 | 9.61E-02  | 5.18E-01 | 3.56E-02  | 1.33E-01 | 9.93E-02  | 3.86E-01 | 6.36E-02  | 1.63E+00 |
| LPE 20:4 sn-2 | 7.81E-01 | -1.33E-02 | 6.77E-01 | 2.68E-02  | 9.87E-01 | -6.66E-04 | 4.96E-01 | 3.95E-02  | 5.38E-01 | 3.39E-02  | 2.92E-01 | 7.41E-02  | 5.22E-01 | 4.02E-02  | 1.08E+00 |
| LPE 22:4 sn-1 | 3.76E-01 | 1.15E-01  | 2.38E-01 | 1.47E-01  | 4.44E-01 | 9.64E-02  | 2.85E-01 | 1.28E-01  | 6.12E-01 | 7.22E-02  | 4.49E-01 | 1.04E-01  | 8.40E-01 | 3.15E-02  | 3.14E+00 |
| LPE 22:4 sn-2 | 6.95E-01 | -2.60E-02 | 9.08E-01 | -9.94E-03 | 6.28E-01 | -3.11E-02 | 8.58E-01 | -1.51E-02 | 7.84E-01 | 2.02E-02  | 6.92E-01 | 3.62E-02  | 8.55E-01 | 1.60E-02  | 9.96E-01 |
| LPE 22:6 sn-1 | 1.93E-01 | 7.34E-02  | 5.35E-01 | 3.44E-02  | 8.35E-01 | 1.03E-02  | 5.67E-01 | -2.87E-02 | 3.31E-01 | 5.97E-02  | 7.33E-01 | 2.07E-02  | 5.34E-01 | -3.90E-02 | 8.05E+00 |
| LPE 22:6 sn-2 | 4.96E-01 | -2.91E-02 | 6.44E-01 | -3.61E-02 | 3.58E-01 | 4.37E-02  | 6.43E-01 | 3.67E-02  | 3.25E-01 | 3.46E-02  | 7.04E-01 | 2.77E-02  | 9.23E-01 | -6.98E-03 | 1.26E+01 |
| LPE P-16:0    | 4.92E-01 | 5.64E-02  | 4.22E-02 | 1.70E-01  | 5.39E-01 | 4.98E-02  | 4.74E-02 | 1.64E-01  | 9.32E-01 | 7.07E-03  | 1.43E-01 | 1.21E-01  | 2.85E-01 | 1.14E-01  | 1.99E+00 |
| LPE P-18:0    | 5.53E-01 | 4.22E-02  | 5.60E-02 | 1.42E-01  | 5.98E-01 | 3.66E-02  | 5.95E-02 | 1.36E-01  | 9.52E-01 | 4.44E-03  | 1.68E-01 | 1.04E-01  | 2.88E-01 | 9.96E-02  | 1.90E+00 |
| LPE P-18:1    | 7.78E-01 | 2.44E-02  | 6.17E-01 | -3.68E-02 | 8.07E-01 | 2.08E-02  | 5.75E-01 | -4.04E-02 | 5.25E-01 | 5.79E-02  | 9.66E-01 | -3.31E-03 | 5.36E-01 | -6.12E-02 | 2.09E+00 |
| LPE P-20:0    | 4.70E-01 | 8.98E-02  | 2.22E-02 | 3.19E-01  | 7.36E-01 | 3.86E-02  | 3.52E-02 | 2.68E-01  | 8.21E-01 | -2.98E-02 | 1.61E-01 | 1.99E-01  | 1.34E-01 | 2.29E-01  | 5.50E+00 |
| LPE P-20:1    | 1.00E+00 | 6.97E-05  | 6.60E-01 | -5.41E-02 | 8.01E-01 | -3.13E-02 | 4.82E-01 | -8.55E-02 | 9.01E-01 | 1.75E-02  | 7.90E-01 | -3.67E-02 | 6.97E-01 | -5.42E-02 | 6.34E+00 |
| LPE P-22:1    | 9.92E-01 | 1.38E-03  | 5.51E-01 | 8.93E-02  | 4.61E-01 | -9.19E-02 | 9.75E-01 | -4.06E-03 | 5.23E-01 | -8.35E-02 | 9.75E-01 | 4.35E-03  | 5.15E-01 | 8.79E-02  | 7.77E+00 |
| LPG 16:0 sn-1 | 9.97E-01 | -2.72E-04 | 1.04E-01 | -1.29E-01 | 9.22E-01 | 5.16E-03  | 5.88E-02 | -1.24E-01 | 4.62E-01 | 7.89E-02  | 6.42E-01 | -5.02E-02 | 7.75E-02 | -1.29E-01 | 1.49E+00 |
| LPG 16:0 sn-2 | 9.39E-01 | -5.53E-03 | 9.29E-02 | -1.40E-01 | 6.02E-01 | 2.47E-02  | 8.06E-02 | -1.09E-01 | 5.35E-01 | 5.96E-02  | 4.56E-01 | -7.45E-02 | 4.57E-02 | -1.34E-01 | 2.82E+00 |
| LPG 18:0 sn-1 | 9.94E-01 | 4.81E-04  | 9.23E-02 | -1.20E-01 | 8.88E-01 | 6.17E-03  | 4.03E-02 | -1.14E-01 | 4.70E-01 | 7.38E-02  | 6.50E-01 | -4.64E-02 | 5.94E-02 | -1.20E-01 | 2.99E+00 |
| LPG 18:0 sn-2 | 4.74E-01 | -4.65E-02 | 6.42E-02 | -1.67E-01 | 1.99E-01 | 6.20E-02  | 4.28E-01 | -5.84E-02 | 4.86E-01 | 7.26E-02  | 6.77E-01 | -4.78E-02 | 1.44E-01 | -1.20E-01 | 7.21E+00 |
| LPG 18:1 sn-1 | 4.54E-01 | 6.11E-02  | 2.52E-02 | -1.78E-01 | 4.83E-01 | 4.17E-02  | 1.53E-03 | -1.97E-01 | 9.72E-02 | 2.31E-01  | 9.49E-01 | -7.92E-03 | 1.90E-03 | -2.39E-01 | 2.17E+00 |
| LPG 18:1 sn-2 | 5.62E-01 | 3.70E-02  | 5.31E-02 | -2.03E-01 | 4.58E-01 | 3.70E-02  | 3.90E-02 | -2.03E-01 | 3.68E-01 | 1.05E-01  | 3.16E-01 | -1.35E-01 | 2.58E-02 | -2.40E-01 | 3.45E+00 |
| LPG 20:4 sn-1 | 2.04E-01 | 1.26E-01  | 3.90E-01 | -7.37E-02 | 3.73E-01 | 6.56E-02  | 3.72E-02 | -1.34E-01 | 1.28E-01 | 2.17E-01  | 8.87E-01 | 1.79E-02  | 1.67E-02 | -1.99E-01 | 1.65E+00 |
| LPG 20:4 sn-2 | 5.26E-01 | 6.68E-02  | 2.12E-01 | -1.42E-01 | 1.51E-01 | 1.21E-01  | 3.46E-01 | -8.87E-02 | 9.26E-02 | 2.28E-01  | 8.88E-01 | 1.86E-02  | 5.66E-02 | -2.09E-01 | 7.00E+00 |
| LPG 22:6 sn-1 | 2.87E-01 | 1.04E-01  | 8.50E-04 | -2.92E-01 | 1.93E-01 | 1.10E-01  | 1.58E-04 | -2.85E-01 | 2.91E-02 | 3.46E-01  | 6.90E-01 | -4.97E-02 | 5.16E-05 | -3.95E-01 | 2.56E+00 |
| LPG 22:6 sn-2 | 2.33E-01 | 8.77E-02  | 2.87E-03 | -2.83E-01 | 4.30E-01 | 5.44E-02  | 9.25E-04 | -3.17E-01 | 4.97E-02 | 2.71E-01  | 4.32E-01 | -9.97E-02 | 2.59E-04 | -3.71E-01 | 5.04E+00 |
| LPI 16:0 sn-1 | 1.25E-03 | -2.16E-01 | 1.51E-02 | -1.38E-01 | 8.61E-02 | -1.17E-01 | 5.36E-01 | -3.81E-02 | 3.45E-01 | -5.65E-02 | 6.88E-01 | 2.20E-02  | 1.19E-01 | 7.85E-02  | 1.58E+00 |
| LPI 16:0 sn-2 | 5.20E-02 | -1.61E-01 | 8.99E-02 | -1.34E-01 | 1.18E-01 | -1.17E-01 | 2.04E-01 | -9.08E-02 | 8.98E-01 | -9.87E-03 | 8.23E-01 | 1.67E-02  | 7.18E-01 | 2.66E-02  | 3.42E+00 |
| LPI 18:0 sn-1 | 1.05E-02 | -1.41E-01 | 4.88E-01 | -4.00E-02 | 1.55E-01 | -7.81E-02 | 7.03E-01 | 2.30E-02  | 1.79E-01 | -5.82E-02 | 3.93E-01 | 4.29E-02  | 6.92E-02 | 1.01E-01  | 1.57E+00 |
| LPI 18:0 sn-2 | 2.55E-02 | -2.00E-01 | 4.75E-01 | -5.98E-02 | 1.76E-01 | -1.17E-01 | 7.88E-01 | 2.28E-02  | 2.68E-01 | -8.58E-02 | 4.75E-01 | 5.43E-02  | 1.28E-01 | 1.40E-01  | 1.26E+00 |
| LPI 18:1 sn-1 | 6.55E-02 | -1.31E-01 | 2.75E-01 | -6.19E-02 | 3.79E-01 | -6.52E-02 | 9.49E-01 | 4.05E-03  | 9.88E-01 | -1.18E-03 | 3.54E-01 | 6.81E-02  | 2.44E-01 | 6.92E-02  | 1.02E+00 |
| LPI 18:1 sn-2 | 5.68E-02 | -1.45E-01 | 2.04E-01 | -8.69E-02 | 3.95E-01 | -6.64E-02 | 9.05E-01 | -8.67E-03 | 6.45E-01 | -3.54E-02 | 7.59E-01 | 2.23E-02  | 4.07E-01 | 5.77E-02  | 1.71E+00 |

|                                    |          |           |          |           |          |           |          |           |          |           |          |           |          |           |          |
|------------------------------------|----------|-----------|----------|-----------|----------|-----------|----------|-----------|----------|-----------|----------|-----------|----------|-----------|----------|
| LPI 20:4 sn-1                      | 7.07E-01 | -2.69E-02 | 6.62E-01 | 2.35E-02  | 8.56E-01 | -1.15E-02 | 3.59E-01 | 3.89E-02  | 7.33E-01 | 2.60E-02  | 2.18E-01 | 7.64E-02  | 4.15E-01 | 5.04E-02  | 5.59E-01 |
| LPI 20:4 sn-2                      | 9.59E-02 | -1.08E-01 | 9.61E-01 | -3.49E-03 | 6.33E-01 | -3.40E-02 | 3.84E-01 | 7.02E-02  | 6.96E-01 | -2.69E-02 | 3.27E-01 | 7.73E-02  | 1.38E-01 | 1.04E-01  | 2.15E+00 |
| LPI 22:6 sn-1                      | 1.44E-01 | -1.35E-01 | 7.32E-03 | -1.99E-01 | 3.11E-01 | -8.95E-02 | 2.63E-02 | -1.54E-01 | 9.42E-01 | 7.79E-03  | 5.30E-01 | -5.70E-02 | 4.28E-01 | -6.48E-02 | 1.78E+00 |
| LPI 22:6 sn-2                      | 9.13E-03 | -2.03E-01 | 2.42E-02 | -1.94E-01 | 3.41E-02 | -1.57E-01 | 7.26E-02 | -1.48E-01 | 4.51E-01 | -5.78E-02 | 5.62E-01 | -4.91E-02 | 9.01E-01 | 8.74E-03  | 3.61E+00 |
| LPS 18:0 sn-1                      | 4.69E-01 | -8.76E-02 | 7.25E-01 | -4.80E-02 | 3.49E-01 | -1.11E-01 | 5.95E-01 | -7.14E-02 | 8.93E-01 | -1.63E-02 | 8.65E-01 | 2.33E-02  | 7.92E-01 | 3.96E-02  | 6.84E+00 |
| LPS 18:0 sn-2                      | 6.21E-01 | -9.16E-02 | 7.67E-01 | -5.80E-02 | 2.94E-01 | -1.96E-01 | 4.11E-01 | -1.62E-01 | 7.73E-01 | -5.24E-02 | 9.22E-01 | -1.88E-02 | 8.78E-01 | 3.36E-02  | 1.06E+01 |
| LPS 18:1 sn-1                      | 3.27E-01 | -1.22E-01 | 1.85E-01 | -1.47E-01 | 2.64E-01 | -1.46E-01 | 1.47E-01 | -1.70E-01 | 9.36E-01 | 1.09E-02  | 9.13E-01 | -1.34E-02 | 8.52E-01 | -2.43E-02 | 3.94E+00 |
| LPS 18:1 sn-2                      | 2.54E-02 | -1.84E-01 | 4.32E-02 | -2.26E-01 | 5.29E-02 | -1.61E-01 | 6.94E-02 | -2.03E-01 | 6.37E-01 | -3.52E-02 | 4.52E-01 | -7.65E-02 | 6.86E-01 | -4.13E-02 | 3.42E+00 |
| Lysine                             | 7.72E-01 | 3.02E-02  | 9.39E-03 | -2.77E-01 | 9.62E-01 | 6.08E-03  | 1.72E-02 | -3.01E-01 | 8.91E-01 | 1.20E-02  | 2.00E-03 | -2.95E-01 | 4.91E-03 | -3.07E-01 | 7.90E+00 |
| Malic acid                         | 8.96E-01 | 1.95E-02  | 2.73E-03 | -4.18E-01 | 9.93E-01 | 1.25E-03  | 9.00E-04 | -4.36E-01 | 2.66E-01 | 1.88E-01  | 8.40E-02 | -2.49E-01 | 5.88E-03 | -4.38E-01 | 4.68E+00 |
| Malonic acid                       | 4.74E-01 | -8.98E-02 | 7.24E-03 | -6.64E-01 | 2.09E-01 | 1.46E-01  | 4.90E-02 | -4.28E-01 | 6.90E-01 | 5.12E-02  | 2.46E-02 | -5.23E-01 | 1.19E-02 | -5.74E-01 | 2.50E+01 |
| Methionine                         | 1.33E-01 | 4.83E-01  | 1.13E-03 | -1.51E+00 | 9.31E-02 | 5.19E-01  | 1.22E-03 | -1.47E+00 | 6.13E-02 | 9.23E-01  | 1.40E-02 | -1.07E+00 | 2.66E-04 | -1.99E+00 | 5.27E+00 |
| Methylamine                        | 3.41E-03 | 6.08E-01  | 1.78E-02 | -7.92E-01 | 7.73E-03 | 6.05E-01  | 1.92E-02 | -7.95E-01 | 2.89E-04 | 1.00E+00  | 1.98E-01 | -3.99E-01 | 9.20E-04 | -1.40E+00 | 1.32E+01 |
| MG 14:0 (1)                        | 2.05E-05 | 3.89E-01  | 9.26E-06 | 5.37E-01  | 2.19E-05 | 3.50E-01  | 1.14E-05 | 4.99E-01  | 1.75E-01 | 5.57E-02  | 1.04E-02 | 2.04E-01  | 5.23E-02 | 1.48E-01  | 3.27E+00 |
| MG 16:0 (1)                        | 6.65E-01 | 4.01E-02  | 7.73E-02 | -1.79E-01 | 4.24E-01 | 5.56E-02  | 4.86E-02 | -1.64E-01 | 4.01E-01 | 7.90E-02  | 1.62E-01 | -1.40E-01 | 7.98E-03 | -2.19E-01 | 5.31E+00 |
| MG 16:0 (2)                        | 6.37E-01 | 4.01E-02  | 1.67E-01 | -1.33E-01 | 3.62E-01 | 5.97E-02  | 1.57E-01 | -1.13E-01 | 6.55E-01 | 4.05E-02  | 1.87E-01 | -1.32E-01 | 3.07E-02 | -1.73E-01 | 4.09E+00 |
| MG 18:0 (1)                        | 3.44E-01 | -1.19E-01 | 1.97E-01 | -1.72E-01 | 7.87E-01 | 3.64E-02  | 9.06E-01 | -1.64E-02 | 6.74E-01 | 7.53E-02  | 9.01E-01 | 2.24E-02  | 6.34E-01 | -5.28E-02 | 3.02E+00 |
| MG 18:0 (2)                        | 1.03E-01 | 1.12E-01  | 5.08E-03 | 2.17E-01  | 1.18E-02 | 2.71E-01  | 1.48E-03 | 3.76E-01  | 2.86E-01 | 1.19E-01  | 6.16E-02 | 2.24E-01  | 2.26E-01 | 1.05E-01  | 1.31E+01 |
| MG 18:1 (1)                        | 3.58E-05 | 3.06E-01  | 2.02E-06 | 4.20E-01  | 1.38E-03 | 3.22E-01  | 1.35E-04 | 4.37E-01  | 1.83E-01 | 1.39E-01  | 2.81E-02 | 2.54E-01  | 1.38E-01 | 1.15E-01  | 7.70E+00 |
| MG 18:1 (2)                        | 9.40E-01 | -7.43E-03 | 5.19E-02 | -1.57E-01 | 8.45E-01 | -2.09E-02 | 5.92E-02 | -1.71E-01 | 5.53E-01 | 9.71E-02  | 7.19E-01 | -5.27E-02 | 1.40E-01 | -1.50E-01 | 3.76E+00 |
| MG 18:2 (2)                        | 8.64E-01 | 1.97E-02  | 9.85E-01 | -1.22E-03 | 2.18E-01 | 1.79E-01  | 1.65E-01 | 1.58E-01  | 2.90E-01 | 1.91E-01  | 2.75E-01 | 1.70E-01  | 8.51E-01 | -2.09E-02 | 2.08E+01 |
| MG 20:4 (1)                        | 1.24E-01 | 2.50E-01  | 4.09E-01 | 1.33E-01  | 3.89E-01 | 1.39E-01  | 8.91E-01 | 2.24E-02  | 2.13E-01 | 3.72E-01  | 3.77E-01 | 2.55E-01  | 3.26E-01 | -1.17E-01 | 2.92E+00 |
| MG 20:4 (2)                        | 5.54E-02 | 3.44E-01  | 2.81E-01 | 1.79E-01  | 3.43E-01 | 1.70E-01  | 9.77E-01 | 4.92E-03  | 1.52E-01 | 4.24E-01  | 3.49E-01 | 2.59E-01  | 2.10E-01 | -1.65E-01 | 2.73E+00 |
| MG 22:6 (1)                        | 1.77E-01 | 1.21E-01  | 8.23E-01 | -2.16E-02 | 1.85E-01 | 1.17E-01  | 7.90E-01 | -2.55E-02 | 1.52E-01 | 2.09E-01  | 6.44E-01 | 6.64E-02  | 1.25E-01 | -1.43E-01 | 5.03E+00 |
| MG 22:6 (2)                        | 5.61E-02 | 2.11E-01  | 8.40E-01 | -2.06E-02 | 7.29E-02 | 1.92E-01  | 6.97E-01 | -3.91E-02 | 1.38E-01 | 2.47E-01  | 9.16E-01 | 1.61E-02  | 4.79E-02 | -2.31E-01 | 2.55E+00 |
| Monoisoamylamine                   | 2.67E-03 | -5.18E-01 | 1.54E-02 | -7.57E-01 | 4.12E-01 | -1.16E-01 | 2.15E-01 | -3.55E-01 | 5.32E-01 | -1.55E-01 | 2.46E-01 | -3.94E-01 | 3.22E-01 | -2.39E-01 | 2.00E+01 |
| Myo-Inositol                       | 2.63E-01 | 3.22E-02  | 8.81E-01 | 3.92E-03  | 6.53E-01 | -2.37E-02 | 3.15E-01 | -5.20E-02 | 4.46E-01 | -4.50E-02 | 2.09E-01 | -7.32E-02 | 1.98E-01 | -2.83E-02 | 2.56E+00 |
| NAA (N-acetylaspartate)            | 4.10E-01 | 5.50E-02  | 1.49E-05 | 6.73E-01  | 1.57E-01 | 1.12E-01  | 1.31E-05 | 7.30E-01  | 2.42E-02 | 1.94E-01  | 3.77E-06 | 8.12E-01  | 1.30E-04 | 6.18E-01  | 3.94E+00 |
| NAAG (N-acetyl-aspartyl-glutamate) | 3.05E-01 | 6.93E-02  | 8.99E-01 | 1.03E-02  | 2.28E-02 | -1.59E-01 | 1.41E-02 | -2.18E-01 | 3.76E-01 | 1.19E-01  | 6.66E-01 | 5.97E-02  | 3.57E-01 | -5.91E-02 | 2.31E+00 |
| N-Acetyl-L-glutamic acid           | 1.52E-02 | 2.03E-01  | 3.44E-01 | 7.20E-02  | 8.99E-02 | 2.01E-01  | 5.26E-01 | 7.01E-02  | 7.52E-01 | 3.28E-02  | 3.35E-01 | -9.82E-02 | 2.80E-02 | -1.31E-01 | 9.87E+00 |
| N-Acetylneuraminic Acid            | 8.49E-01 | 1.11E-02  | 5.86E-02 | -1.08E-01 | 3.76E-01 | -4.38E-02 | 1.72E-03 | -1.63E-01 | 2.53E-01 | 6.65E-02  | 3.26E-01 | -5.30E-02 | 2.88E-02 | -1.19E-01 | 3.43E+00 |
| Nervonic acid                      | 6.62E-01 | 2.11E-02  | 2.22E-01 | 5.45E-02  | 1.03E-02 | 2.07E-01  | 3.06E-03 | 2.41E-01  | 4.59E-01 | 4.72E-02  | 1.92E-01 | 8.06E-02  | 5.09E-01 | 3.34E-02  | 8.95E+00 |
| Nicotinamide                       | 6.63E-05 | 1.46E-01  | 5.76E-03 | 1.23E-01  | 1.85E-01 | 6.46E-02  | 4.59E-01 | 4.11E-02  | 6.29E-02 | 1.39E-01  | 1.40E-01 | 1.15E-01  | 4.95E-01 | -2.35E-02 | 5.90E+00 |
| Nicotinic acid                     | 6.86E-02 | 1.20E+00  | 4.50E-02 | -3.38E+00 | 3.36E-01 | 9.43E-01  | 4.21E-02 | -3.63E+00 | 7.63E-01 | 1.78E-01  | 3.55E-02 | -4.40E+00 | 4.51E-02 | -4.57E+00 | 2.33E+01 |

|                           |          |           |          |           |          |           |          |           |          |           |          |           |          |           |          |
|---------------------------|----------|-----------|----------|-----------|----------|-----------|----------|-----------|----------|-----------|----------|-----------|----------|-----------|----------|
| N-oleoyl taurine          | 6.02E-01 | 4.91E-02  | 6.97E-02 | -1.65E-01 | 7.45E-02 | 1.39E-01  | 2.85E-01 | -7.53E-02 | 7.47E-01 | -3.33E-02 | 1.73E-02 | -2.48E-01 | 7.42E-03 | -2.14E-01 | 1.74E+00 |
| Nonanoic acid             | 8.77E-02 | 1.26E-01  | 1.33E-02 | 2.07E-01  | 5.61E-02 | 2.09E-01  | 1.48E-02 | 2.90E-01  | 4.14E-01 | 6.66E-02  | 1.01E-01 | 1.47E-01  | 2.11E-01 | 8.09E-02  | 1.16E+01 |
| Octadecadienoic acid      | 2.76E-02 | 1.95E-01  | 5.00E-01 | 5.30E-02  | 1.51E-02 | 2.66E-01  | 2.05E-01 | 1.23E-01  | 1.38E-01 | 1.34E-01  | 9.19E-01 | -8.43E-03 | 3.90E-02 | -1.42E-01 | 3.41E+00 |
| Oleic acid                | 3.68E-02 | 1.80E-01  | 3.17E-01 | -7.97E-02 | 2.62E-01 | 7.29E-02  | 8.76E-03 | -1.87E-01 | 2.21E-01 | 9.15E-02  | 2.95E-02 | -1.68E-01 | 1.80E-03 | -2.60E-01 | 1.68E+00 |
| Orthophosphate            | 2.76E-01 | -1.18E-01 | 3.17E-01 | -7.93E-02 | 7.05E-01 | -3.99E-02 | 9.86E-01 | -1.39E-03 | 4.66E-01 | -7.15E-02 | 6.19E-01 | -3.30E-02 | 7.21E-01 | 3.85E-02  | 9.40E+00 |
| Palmitic acid             | 1.22E-03 | 3.66E-01  | 1.43E-01 | -1.61E-01 | 1.12E-02 | 2.63E-01  | 2.16E-02 | -2.63E-01 | 2.27E-01 | 1.48E-01  | 6.31E-03 | -3.79E-01 | 4.83E-05 | -5.27E-01 | 5.15E+00 |
| Palmitoylcarnitine        | 4.51E-02 | -1.73E-01 | 6.35E-04 | -3.15E-01 | 3.27E-01 | -7.37E-02 | 6.15E-03 | -2.16E-01 | 4.22E-01 | 1.07E-01  | 7.82E-01 | -3.49E-02 | 1.07E-01 | -1.42E-01 | 2.34E+00 |
| Pantothenate              | 7.00E-01 | -3.16E-02 | 8.83E-01 | -1.40E-02 | 1.82E-02 | -1.62E-01 | 8.80E-02 | -1.44E-01 | 2.12E-01 | 1.16E-01  | 2.02E-01 | 1.34E-01  | 7.82E-01 | 1.76E-02  | 3.44E+00 |
| Phenylalanine             | 4.60E-02 | 6.69E-01  | 2.72E-03 | -1.39E+00 | 4.25E-02 | 7.40E-01  | 3.91E-03 | -1.32E+00 | 2.63E-02 | 1.03E+00  | 1.78E-02 | -1.02E+00 | 3.51E-04 | -2.06E+00 | 3.19E+00 |
| Phosphocholine            | 4.65E-03 | 1.22E-01  | 3.36E-03 | 1.42E-01  | 9.67E-02 | 6.56E-02  | 5.58E-02 | 8.58E-02  | 5.79E-03 | 1.31E-01  | 4.00E-03 | 1.51E-01  | 6.03E-01 | 2.02E-02  | 1.61E+00 |
| Phosphorylethanolamine    | 4.27E-01 | 5.68E-02  | 3.02E-02 | 2.14E-01  | 1.82E-02 | 1.68E-01  | 1.28E-03 | 3.26E-01  | 2.86E-03 | 1.54E-01  | 3.02E-04 | 3.11E-01  | 7.47E-02 | 1.57E-01  | 8.16E+00 |
| Pimelic acid              | 2.17E-02 | 5.11E-01  | 1.22E-01 | 4.08E-01  | 4.45E-02 | 5.56E-01  | 1.39E-01 | 4.53E-01  | 1.58E-01 | 3.89E-01  | 3.57E-01 | 2.86E-01  | 7.03E-01 | -1.03E-01 | 3.09E+01 |
| Pipecolic acid            | 2.06E-01 | -1.24E-01 | 1.80E-03 | -3.07E-01 | 8.84E-03 | -2.20E-01 | 5.64E-06 | -4.02E-01 | 9.30E-01 | -8.10E-03 | 3.06E-02 | -1.91E-01 | 3.50E-02 | -1.83E-01 | 4.84E+00 |
| Proline                   | 9.34E-01 | 4.68E-03  | 2.69E-02 | -1.25E-01 | 1.72E-01 | -7.53E-02 | 6.10E-04 | -2.05E-01 | 8.15E-01 | -1.45E-02 | 2.17E-02 | -1.45E-01 | 3.91E-02 | -1.30E-01 | 3.68E+00 |
| Putrescine                | 5.39E-01 | -9.32E-02 | 2.08E-02 | 2.91E-01  | 1.71E-01 | 2.24E-01  | 3.82E-04 | 6.08E-01  | 7.95E-01 | -4.08E-02 | 1.40E-02 | 3.43E-01  | 2.77E-02 | 3.84E-01  | 2.16E+01 |
| Pyridoxine                | 9.81E-02 | 9.23E-01  | 3.76E-03 | -1.55E+00 | 5.99E-02 | 1.04E+00  | 5.50E-03 | -1.43E+00 | 1.31E-01 | 1.69E+00  | 1.89E-01 | -7.86E-01 | 4.67E-04 | -2.47E+00 | 1.60E+01 |
| Pyroglutamic acid         | 1.07E-01 | 6.13E-01  | 1.62E-02 | -9.58E-01 | 2.84E-02 | 8.17E-01  | 4.09E-02 | -7.53E-01 | 5.63E-02 | 8.96E-01  | 8.76E-02 | -6.74E-01 | 9.82E-04 | -1.57E+00 | 7.07E+00 |
| Pyruvic acid              | 2.29E-02 | -4.30E-01 | 9.26E-03 | -5.72E-01 | 4.97E-01 | -1.12E-01 | 1.79E-01 | -2.53E-01 | 9.71E-01 | 7.67E-03  | 5.42E-01 | -1.34E-01 | 4.98E-01 | -1.42E-01 | 9.73E+00 |
| Riboflavine               | 1.16E-02 | 1.01E+00  | 7.80E-03 | -9.79E-01 | 7.25E-02 | 8.08E-01  | 3.98E-03 | -1.18E+00 | 1.49E-03 | 1.17E+00  | 1.45E-02 | -8.22E-01 | 9.39E-05 | -1.99E+00 | 6.95E+00 |
| Ribose                    | 7.70E-02 | -3.63E-01 | 3.05E-04 | -1.32E+00 | 4.53E-01 | -1.59E-01 | 1.09E-03 | -1.12E+00 | 7.85E-01 | 8.12E-02  | 1.12E-02 | -8.76E-01 | 2.32E-03 | -9.58E-01 | 2.52E+01 |
| S-Adenosyl-L-homocysteine | 8.54E-01 | -1.73E-02 | 5.03E-03 | 6.11E-01  | 2.09E-01 | -9.36E-02 | 8.49E-03 | 5.35E-01  | 7.40E-01 | 4.89E-02  | 9.46E-03 | 6.77E-01  | 1.61E-03 | 6.29E-01  | 3.67E+00 |
| Serine                    | 7.04E-02 | 6.80E-01  | 1.20E-02 | -2.86E+00 | 4.48E-02 | 1.20E+00  | 1.91E-02 | -2.34E+00 | 3.57E-02 | 1.83E+00  | 4.47E-02 | -1.72E+00 | 8.24E-03 | -3.54E+00 | 1.14E+01 |
| Stearic acid              | 7.64E-01 | 2.08E-02  | 6.28E-01 | -2.96E-02 | 7.86E-02 | 1.72E-01  | 1.76E-01 | 1.21E-01  | 2.23E-01 | 9.92E-02  | 5.04E-01 | 4.87E-02  | 4.12E-01 | -5.05E-02 | 3.50E+00 |
| Succinic acid             | 4.20E-01 | 1.43E-01  | 2.95E-02 | 4.18E-01  | 5.31E-01 | 1.03E-01  | 3.18E-02 | 3.78E-01  | 5.81E-01 | 1.02E-01  | 5.83E-02 | 3.77E-01  | 1.60E-01 | 2.76E-01  | 5.46E+00 |
| Tartaric acid             | 7.20E-01 | 7.02E-02  | 1.46E-01 | -2.68E-01 | 4.36E-01 | 1.29E-01  | 1.81E-01 | -2.09E-01 | 8.51E-01 | -3.74E-02 | 5.11E-02 | -3.76E-01 | 5.96E-02 | -3.38E-01 | 1.15E+01 |
| Taurine                   | 5.10E-02 | 7.28E-01  | 4.57E-03 | -1.57E+00 | 1.72E-02 | 1.08E+00  | 1.55E-02 | -1.22E+00 | 3.53E-02 | 1.29E+00  | 4.44E-02 | -1.01E+00 | 8.59E-04 | -2.30E+00 | 3.82E+00 |
| Taurocholic acid          | 7.04E-01 | 5.30E-01  | 6.59E-01 | 5.68E-01  | 9.80E-01 | -3.48E-02 | 9.98E-01 | 3.59E-03  | 4.11E-01 | 9.31E-01  | 3.54E-01 | 9.70E-01  | 9.79E-01 | 3.84E-02  | 4.82E+00 |
| Thiamine                  | 5.10E-01 | 1.42E-01  | 3.56E-03 | -7.06E-01 | 5.14E-01 | 1.56E-01  | 6.10E-03 | -6.92E-01 | 2.86E-01 | 3.11E-01  | 4.46E-02 | -5.37E-01 | 1.12E-03 | -8.48E-01 | 7.24E+00 |
| Threonine                 | 2.31E-02 | 1.08E+00  | 9.38E-03 | -2.64E+00 | 2.04E-02 | 1.45E+00  | 1.39E-02 | -2.27E+00 | 2.91E-02 | 2.13E+00  | 4.26E-02 | -1.59E+00 | 4.78E-03 | -3.72E+00 | 8.51E+00 |
| Thymidine                 | 7.84E-02 | 4.57E-01  | 2.47E-01 | -3.35E-01 | 1.32E-01 | 4.19E-01  | 2.19E-01 | -3.73E-01 | 7.19E-02 | 6.54E-01  | 6.79E-01 | -1.38E-01 | 2.17E-02 | -7.92E-01 | 5.33E+00 |
| Thymine                   | 2.18E-01 | 3.00E-01  | 4.48E-02 | -5.52E-01 | 2.79E-01 | 3.20E-01  | 7.67E-02 | -5.31E-01 | 1.60E-01 | 5.01E-01  | 2.73E-01 | -3.50E-01 | 7.84E-03 | -8.51E-01 | 6.83E+00 |
| Trimethylamine            | 3.50E-01 | 4.21E-01  | 1.99E-01 | -5.93E-01 | 6.22E-01 | 1.61E-01  | 5.39E-02 | -8.52E-01 | 6.73E-01 | 1.72E-01  | 8.50E-02 | -8.41E-01 | 2.77E-02 | -1.01E+00 | 6.69E+00 |
| Trimethylamine-n-oxide    | 2.06E-03 | -1.15E+00 | 2.17E-01 | -4.48E-01 | 8.09E-04 | -1.27E+00 | 1.13E-01 | -5.62E-01 | 5.92E-01 | 1.87E-01  | 4.13E-02 | 8.92E-01  | 3.36E-02 | 7.05E-01  | 7.76E+00 |
| Trimethyllysine N6,N6,N6  | 7.76E-01 | -1.76E-02 | 6.42E-01 | 2.16E-02  | 7.80E-01 | -1.72E-02 | 6.33E-01 | 2.20E-02  | 1.33E-01 | 1.27E-01  | 3.23E-02 | 1.66E-01  | 4.82E-01 | 3.92E-02  | 4.05E+00 |



|                             |          |           |          |           |          |           |          |           |          |           |          |           |          |           |          |
|-----------------------------|----------|-----------|----------|-----------|----------|-----------|----------|-----------|----------|-----------|----------|-----------|----------|-----------|----------|
| Tryptamine                  | 9.11E-01 | -3.45E-02 | 2.28E-02 | -1.09E+00 | 9.85E-01 | 6.00E-03  | 2.75E-02 | -1.05E+00 | 3.38E-01 | 3.05E-01  | 8.15E-02 | -7.54E-01 | 2.29E-02 | -1.06E+00 | 1.32E+01 |
| Tryptophan                  | 2.51E-02 | 8.94E-01  | 4.62E-03 | -1.48E+00 | 2.83E-02 | 1.02E+00  | 7.90E-03 | -1.35E+00 | 1.50E-02 | 1.35E+00  | 3.18E-02 | -1.02E+00 | 5.47E-04 | -2.37E+00 | 3.72E+00 |
| Tyrosine                    | 4.08E-02 | 9.79E-01  | 2.63E-03 | -2.05E+00 | 1.89E-02 | 1.24E+00  | 4.71E-03 | -1.79E+00 | 8.24E-02 | 1.44E+00  | 1.23E-02 | -1.59E+00 | 6.52E-04 | -3.03E+00 | 3.39E+00 |
| Uracil                      | 1.14E-02 | -3.44E-01 | 1.31E-04 | -5.24E-01 | 2.54E-01 | -1.43E-01 | 8.15E-03 | -3.23E-01 | 6.73E-01 | -3.56E-02 | 6.61E-03 | -2.15E-01 | 6.96E-02 | -1.80E-01 | 8.56E+00 |
| Uridine                     | 1.77E-03 | 1.53E-01  | 4.60E-06 | 3.06E-01  | 3.69E-01 | 4.23E-02  | 1.41E-03 | 1.95E-01  | 4.24E-01 | 6.88E-02  | 2.51E-02 | 2.21E-01  | 4.17E-04 | 1.52E-01  | 4.23E+00 |
| Valine                      | 1.41E-01 | -2.07E-01 | 5.47E-03 | -3.72E-01 | 1.66E-01 | -2.20E-01 | 1.10E-02 | -3.85E-01 | 2.78E-01 | -1.41E-01 | 1.24E-02 | -3.06E-01 | 2.00E-01 | -1.65E-01 | 1.91E+01 |
| Xanthine                    | 4.85E-02 | 7.05E-01  | 5.76E-03 | -1.25E+00 | 2.25E-02 | 9.96E-01  | 2.43E-02 | -9.57E-01 | 8.58E-03 | 1.23E+00  | 6.94E-02 | -7.27E-01 | 7.09E-04 | -1.95E+00 | 4.24E+00 |
| $\gamma$ -Aminobutyric acid | 8.63E-02 | 4.09E-01  | 3.47E-03 | -1.52E+00 | 2.02E-02 | 8.20E-01  | 1.69E-02 | -1.11E+00 | 3.58E-02 | 1.08E+00  | 6.69E-02 | -8.47E-01 | 1.18E-03 | -1.93E+00 | 8.05E+00 |

**Table S3.** Extracted p(corr) and VIP values from each statistically significant pairwise comparison based on OPLS discriminant analysis. VIP values  $\geq 1.50$  are marked in red.

| Comparisons                     | 1v4       |          | 1v5       |          | 2v4       |          | 2v5       |          | 3v5       |          | 4v5       |          |
|---------------------------------|-----------|----------|-----------|----------|-----------|----------|-----------|----------|-----------|----------|-----------|----------|
| Compounds                       | p(corr)   | VIP      |
| 1,5-Anhydroglucitol             | -2.30E-01 | 6.50E-01 | 1.50E-01  | 3.10E-01 | -3.70E-01 | 1.07E+00 | 1.00E-02  | 2.00E-02 | 1.00E-01  | 2.30E-01 | 3.90E-01  | 8.90E-01 |
| 2,3-Butanediol                  | -5.20E-01 | 1.36E+00 | -5.50E-01 | 1.20E+00 | -8.00E-02 | 2.50E-01 | -4.00E-02 | 2.00E-01 | -1.80E-01 | 4.20E-01 | -3.00E-02 | 1.00E-02 |
| 2-Hydroxybutyric acid           | 3.80E-01  | 1.08E+00 | 6.90E-01  | 1.57E+00 | 2.90E-01  | 8.40E-01 | 6.00E-01  | 1.48E+00 | -3.00E-02 | 1.30E-01 | 3.10E-01  | 6.90E-01 |
| 2-Ketoglutaric acid             | -3.60E-01 | 9.10E-01 | -2.20E-01 | 4.60E-01 | -2.40E-01 | 6.30E-01 | -1.60E-01 | 3.70E-01 | -3.60E-01 | 9.90E-01 | -4.00E-02 | 0.00E+00 |
| 2-Hydroxyisovaleric acid        | -3.10E-01 | 8.40E-01 | 4.00E-01  | 9.00E-01 | -4.30E-01 | 1.16E+00 | 2.50E-01  | 6.70E-01 | 6.80E-01  | 1.92E+00 | 6.00E-01  | 1.43E+00 |
| 3,4-Dihydroxyphenylacetic acid  | 7.00E-02  | 2.20E-01 | 7.30E-01  | 1.63E+00 | -4.20E-01 | 1.22E+00 | 2.00E-01  | 4.30E-01 | 1.30E-01  | 2.30E-01 | 5.10E-01  | 1.27E+00 |
| 3-Hydroxy-3-methylglutaric acid | 4.60E-01  | 1.27E+00 | 4.40E-01  | 1.01E+00 | -1.10E-01 | 2.40E-01 | 5.00E-02  | 3.00E-02 | -4.00E-02 | 1.50E-01 | 9.00E-02  | 2.00E-01 |
| 3-Hydroxybutyric acid           | 7.70E-01  | 2.01E+00 | 8.30E-01  | 1.87E+00 | 5.00E-01  | 1.47E+00 | 5.60E-01  | 1.29E+00 | 2.00E-02  | 1.00E-01 | -1.20E-01 | 3.00E-01 |
| 3-Methyl-2-oxovaleric acid      | 6.10E-01  | 1.62E+00 | 4.40E-01  | 1.04E+00 | 1.60E-01  | 5.50E-01 | 9.00E-02  | 2.10E-01 | 4.00E-02  | 1.10E-01 | -1.10E-01 | 1.40E-01 |
| 4-Hydroxybenzoic acid           | -7.30E-01 | 1.97E+00 | -4.40E-01 | 9.90E-01 | -6.70E-01 | 1.93E+00 | -3.90E-01 | 1.00E+00 | -3.00E-02 | 1.40E-01 | 4.30E-01  | 1.00E+00 |
| 4-Hydroxyphenyllactic acid      | -5.60E-01 | 1.46E+00 | -5.00E-01 | 1.17E+00 | -3.60E-01 | 1.00E+00 | -2.50E-01 | 6.80E-01 | -1.50E-01 | 5.50E-01 | 1.40E-01  | 3.10E-01 |
| 5-Hydroxyindole-3-acetic acid   | 3.30E-01  | 9.80E-01 | 7.10E-01  | 1.63E+00 | -2.20E-01 | 6.00E-01 | 8.00E-02  | 1.10E-01 | -3.50E-01 | 1.08E+00 | 2.80E-01  | 6.80E-01 |
| 5-Methylthioadenosine           | -6.60E-01 | 1.68E+00 | -8.90E-01 | 1.97E+00 | -3.10E-01 | 8.80E-01 | -8.00E-01 | 1.93E+00 | -7.20E-01 | 2.17E+00 | -7.60E-01 | 1.72E+00 |
| Acetylcarnitine                 | 8.60E-01  | 2.31E+00 | 4.80E-01  | 1.08E+00 | 7.00E-01  | 2.13E+00 | 2.00E-02  | 1.10E-01 | -3.80E-01 | 1.17E+00 | -7.30E-01 | 1.66E+00 |
| Aconitic acid                   | -3.00E-01 | 6.90E-01 | 1.00E-02  | 5.00E-02 | -4.90E-01 | 1.41E+00 | -2.60E-01 | 6.80E-01 | 2.00E-02  | 7.00E-02 | 2.00E-01  | 5.40E-01 |
| Adenosine                       | 4.90E-01  | 1.36E+00 | 3.00E-02  | 1.10E-01 | -7.00E-02 | 1.20E-01 | -4.90E-01 | 1.15E+00 | -1.10E-01 | 5.50E-01 | -4.90E-01 | 1.02E+00 |
| Adenosine monophosphate         | -2.60E-01 | 7.00E-01 | -5.50E-01 | 1.18E+00 | 1.00E-02  | 5.00E-02 | -2.50E-01 | 6.40E-01 | -2.20E-01 | 5.00E-01 | -4.10E-01 | 9.60E-01 |
| Adrenic acid                    | -3.10E-01 | 8.60E-01 | 2.60E-01  | 5.50E-01 | -2.00E-01 | 6.00E-01 | 4.60E-01  | 1.09E+00 | 3.10E-01  | 9.70E-01 | 5.20E-01  | 1.17E+00 |
| Alanine                         | -5.50E-01 | 1.42E+00 | 6.30E-01  | 1.42E+00 | -6.30E-01 | 1.86E+00 | 5.60E-01  | 1.34E+00 | 5.00E-01  | 1.34E+00 | 7.60E-01  | 1.79E+00 |
| alpha-D-Lyxopyranose            | 5.60E-01  | 1.44E+00 | 5.60E-01  | 1.33E+00 | 2.00E-02  | 1.00E-02 | 1.10E-01  | 2.40E-01 | 8.00E-02  | 8.00E-02 | 2.20E-01  | 5.60E-01 |
| alpha-Linolenic acid            | -2.80E-01 | 8.00E-01 | 5.00E-02  | 1.50E-01 | -4.70E-01 | 1.40E+00 | -2.30E-01 | 6.40E-01 | 1.20E-01  | 2.40E-01 | 4.30E-01  | 9.80E-01 |

|                        |           |          |           |          |           |          |           |          |           |          |           |          |
|------------------------|-----------|----------|-----------|----------|-----------|----------|-----------|----------|-----------|----------|-----------|----------|
| alpha-Tocopherol       | 3.20E-01  | 7.70E-01 | 1.60E-01  | 3.90E-01 | -1.60E-01 | 4.90E-01 | -2.40E-01 | 6.40E-01 | -2.30E-01 | 8.10E-01 | -1.60E-01 | 3.30E-01 |
| Arabinitol             | -2.00E-02 | 4.00E-02 | 1.00E-01  | 2.60E-01 | -1.40E-01 | 4.00E-01 | -1.00E-02 | 1.30E-01 | -1.00E-02 | 2.30E-01 | 1.60E-01  | 4.00E-01 |
| Arachidonic acid       | 7.80E-01  | 2.04E+00 | 8.70E-01  | 1.97E+00 | -6.00E-02 | 2.10E-01 | -3.00E-02 | 1.90E-01 | -1.80E-01 | 5.30E-01 | -3.00E-02 | 1.00E-02 |
| Arachidonoylcarnitine  | -7.40E-01 | 1.98E+00 | -3.60E-01 | 8.30E-01 | -6.00E-01 | 1.67E+00 | -5.00E-02 | 1.30E-01 | -7.00E-02 | 1.90E-01 | 5.00E-01  | 1.18E+00 |
| Arginine               | 3.80E-01  | 9.90E-01 | 8.00E-01  | 1.76E+00 | 4.90E-01  | 1.41E+00 | 8.40E-01  | 1.96E+00 | 8.10E-01  | 2.41E+00 | 6.30E-01  | 1.34E+00 |
| Asparagine             | -6.10E-01 | 1.58E+00 | 5.80E-01  | 1.30E+00 | -6.70E-01 | 1.96E+00 | 5.00E-01  | 1.18E+00 | 4.40E-01  | 1.12E+00 | 7.00E-01  | 1.65E+00 |
| Aspartic acid          | 4.70E-01  | 1.29E+00 | 8.40E-01  | 1.83E+00 | 3.10E-01  | 9.70E-01 | 7.20E-01  | 1.66E+00 | 6.80E-01  | 2.04E+00 | 5.70E-01  | 1.21E+00 |
| Azelaic acid           | -1.30E-01 | 2.20E-01 | -3.20E-01 | 7.30E-01 | -4.40E-01 | 1.17E+00 | -6.10E-01 | 1.52E+00 | -6.70E-01 | 1.97E+00 | -1.90E-01 | 3.60E-01 |
| Benzoic acid           | 3.60E-01  | 9.40E-01 | 5.80E-01  | 1.29E+00 | -6.00E-02 | 1.40E-01 | 9.00E-02  | 1.80E-01 | 4.00E-02  | 1.00E-02 | 1.00E-01  | 2.70E-01 |
| beta-Arabinopyranose   | -4.40E-01 | 1.15E+00 | -1.40E-01 | 1.80E-01 | -2.20E-01 | 6.90E-01 | -3.00E-02 | 1.10E-01 | 2.20E-01  | 7.10E-01 | 2.30E-01  | 6.80E-01 |
| Betaine                | -9.00E-02 | 1.40E-01 | 6.50E-01  | 1.48E+00 | 1.90E-01  | 5.80E-01 | 7.50E-01  | 1.83E+00 | 3.10E-01  | 9.00E-01 | 6.60E-01  | 1.56E+00 |
| Carnitine              | -8.40E-01 | 2.24E+00 | -8.00E-01 | 1.78E+00 | -2.90E-01 | 7.00E-01 | -6.00E-02 | 1.60E-01 | -2.00E-01 | 5.80E-01 | 2.40E-01  | 5.70E-01 |
| Cholesterol            | -3.20E-01 | 9.30E-01 | -5.00E-01 | 1.11E+00 | -2.90E-01 | 8.50E-01 | -4.30E-01 | 1.08E+00 | -7.00E-02 | 3.60E-01 | -2.20E-01 | 5.00E-01 |
| Choline                | -2.00E-01 | 4.50E-01 | 4.20E-01  | 9.70E-01 | -2.90E-01 | 8.60E-01 | 3.30E-01  | 8.00E-01 | 2.50E-01  | 7.10E-01 | 4.80E-01  | 1.16E+00 |
| Citramalic acid        | -4.00E-02 | 2.00E-02 | 4.50E-01  | 1.11E+00 | -5.40E-01 | 1.57E+00 | -2.00E-02 | 1.00E-02 | 1.80E-01  | 5.80E-01 | 4.70E-01  | 1.20E+00 |
| Citric acid            | -1.10E-01 | 2.30E-01 | 5.70E-01  | 1.28E+00 | -5.10E-01 | 1.43E+00 | 1.50E-01  | 2.90E-01 | 4.10E-01  | 1.06E+00 | 5.40E-01  | 1.32E+00 |
| Citrulline             | 2.80E-01  | 7.30E-01 | 5.60E-01  | 1.27E+00 | 5.60E-01  | 1.62E+00 | 7.50E-01  | 1.80E+00 | 4.80E-01  | 1.52E+00 | 3.60E-01  | 7.60E-01 |
| Creatine               | -8.20E-01 | 2.14E+00 | 4.50E-01  | 1.00E+00 | -7.90E-01 | 2.29E+00 | 4.20E-01  | 1.01E+00 | 4.10E-01  | 1.06E+00 | 7.90E-01  | 1.87E+00 |
| Creatinine             | -2.30E-01 | 5.30E-01 | 6.00E-01  | 1.38E+00 | -2.80E-01 | 8.40E-01 | 5.30E-01  | 1.30E+00 | 3.00E-01  | 8.60E-01 | 6.20E-01  | 1.52E+00 |
| Cysteine               | 4.00E-02  | 9.00E-02 | -1.10E-01 | 1.90E-01 | -2.50E-01 | 7.80E-01 | -3.20E-01 | 8.00E-01 | -1.90E-01 | 5.60E-01 | -1.60E-01 | 3.50E-01 |
| Cytidine               | -2.70E-01 | 8.30E-01 | -7.20E-01 | 1.65E+00 | -7.00E-02 | 2.20E-01 | -6.10E-01 | 1.51E+00 | -7.40E-01 | 2.10E+00 | -5.30E-01 | 1.28E+00 |
| Cytidine monophosphate | -3.00E-02 | 9.00E-02 | 4.50E-01  | 9.90E-01 | 4.00E-02  | 2.40E-01 | 5.80E-01  | 1.45E+00 | 3.30E-01  | 1.12E+00 | 4.50E-01  | 1.06E+00 |
| Cytosine               | -2.20E-01 | 6.80E-01 | -7.00E-01 | 1.60E+00 | -5.00E-02 | 1.40E-01 | -6.10E-01 | 1.49E+00 | -7.20E-01 | 2.06E+00 | -5.60E-01 | 1.34E+00 |
| D-Erythrose            | 6.10E-01  | 1.60E+00 | -1.30E-01 | 2.60E-01 | 5.30E-01  | 1.60E+00 | -2.40E-01 | 5.70E-01 | -2.30E-01 | 7.50E-01 | -4.40E-01 | 9.60E-01 |
| D-Fructose             | -6.40E-01 | 1.70E+00 | -2.00E-01 | 5.00E-01 | -3.60E-01 | 1.08E+00 | 1.30E-01  | 2.50E-01 | 2.50E-01  | 8.40E-01 | 5.00E-01  | 1.11E+00 |
| D-Fucitol              | 2.60E-01  | 6.90E-01 | 5.80E-01  | 1.29E+00 | -1.10E-01 | 3.60E-01 | 4.20E-01  | 9.30E-01 | 4.10E-01  | 1.26E+00 | 5.20E-01  | 1.17E+00 |
| D-Glucose              | 4.00E-02  | 1.10E-01 | 2.00E-01  | 5.10E-01 | 1.00E-02  | 3.00E-02 | 1.20E-01  | 2.50E-01 | 1.50E-01  | 3.50E-01 | 2.30E-01  | 5.10E-01 |
| Dimethylamine          | 6.90E-01  | 1.92E+00 | 7.70E-01  | 1.75E+00 | 5.90E-01  | 1.70E+00 | 7.00E-01  | 1.68E+00 | 2.20E-01  | 6.60E-01 | 3.30E-01  | 8.00E-01 |
| D-Lyxose               | -2.10E-01 | 5.90E-01 | 3.80E-01  | 8.10E-01 | 0.00E+00  | 2.00E-02 | 4.40E-01  | 9.90E-01 | 3.80E-01  | 1.09E+00 | 4.30E-01  | 9.60E-01 |
| D-Mannitol             | -1.30E-01 | 3.50E-01 | 4.00E-02  | 1.10E-01 | -3.70E-01 | 1.03E+00 | -1.40E-01 | 4.30E-01 | 8.00E-02  | 7.00E-02 | 1.10E-01  | 3.10E-01 |
| Docosahexaenoic acid   | -2.40E-01 | 7.10E-01 | 5.30E-01  | 1.15E+00 | -3.50E-01 | 1.04E+00 | 6.00E-01  | 1.43E+00 | 5.50E-01  | 1.62E+00 | 6.90E-01  | 1.56E+00 |
| Docosapentaenoic acid  | -6.50E-01 | 1.77E+00 | 3.10E-01  | 6.60E-01 | -6.50E-01 | 1.86E+00 | 5.40E-01  | 1.31E+00 | 7.60E-01  | 2.17E+00 | 8.30E-01  | 1.90E+00 |
| Docosenamide           | -4.80E-01 | 1.32E+00 | -2.30E-01 | 5.80E-01 | -1.10E-01 | 4.00E-01 | 1.70E-01  | 4.10E-01 | -1.00E-01 | 2.20E-01 | 3.10E-01  | 7.90E-01 |
| Eicosapentaenoic acid  | -7.20E-01 | 1.90E+00 | -5.00E-02 | 1.60E-01 | -4.80E-01 | 1.36E+00 | 3.00E-01  | 7.70E-01 | 6.80E-01  | 1.96E+00 | 7.20E-01  | 1.63E+00 |

|                     |           |          |           |          |           |          |           |          |           |          |           |          |
|---------------------|-----------|----------|-----------|----------|-----------|----------|-----------|----------|-----------|----------|-----------|----------|
| Eicosatrienoic acid | -6.20E-01 | 1.65E+00 | 2.40E-01  | 5.10E-01 | -5.40E-01 | 1.53E+00 | 4.10E-01  | 1.00E+00 | 6.70E-01  | 1.97E+00 | 8.30E-01  | 1.89E+00 |
| Ethanolamine        | 2.00E-02  | 1.00E-02 | 1.30E-01  | 3.10E-01 | -6.00E-02 | 1.80E-01 | 5.00E-02  | 9.00E-02 | 2.60E-01  | 9.30E-01 | 1.50E-01  | 3.50E-01 |
| Fumaric acid        | 3.00E-02  | 1.00E-01 | 4.70E-01  | 1.09E+00 | 9.00E-02  | 3.10E-01 | 5.20E-01  | 1.26E+00 | 2.90E-01  | 9.20E-01 | 3.60E-01  | 9.20E-01 |
| Galactose           | -5.20E-01 | 1.42E+00 | -1.30E-01 | 3.10E-01 | -2.40E-01 | 7.40E-01 | 2.30E-01  | 5.30E-01 | 2.00E-02  | 2.60E-01 | 5.20E-01  | 1.16E+00 |
| Glutamic acid       | -5.20E-01 | 1.26E+00 | -6.60E-01 | 1.49E+00 | -6.30E-01 | 1.69E+00 | -7.60E-01 | 1.86E+00 | -6.10E-01 | 1.86E+00 | -2.20E-01 | 4.90E-01 |
| Glutamine           | -5.70E-01 | 1.47E+00 | 5.30E-01  | 1.20E+00 | -7.20E-01 | 2.12E+00 | 3.90E-01  | 9.20E-01 | 3.60E-01  | 9.40E-01 | 7.30E-01  | 1.72E+00 |
| Glutaric acid       | 2.70E-01  | 7.30E-01 | -1.90E-01 | 4.40E-01 | 1.00E-01  | 2.90E-01 | -1.40E-01 | 4.50E-01 | -4.10E-01 | 1.18E+00 | -4.50E-01 | 1.04E+00 |
| Glyceric acid       | -3.80E-01 | 1.05E+00 | 5.40E-01  | 1.17E+00 | -6.00E-01 | 1.75E+00 | 4.70E-01  | 1.10E+00 | 3.30E-01  | 1.05E+00 | 6.60E-01  | 1.45E+00 |
| Glycerol            | 1.10E-01  | 3.70E-01 | 6.30E-01  | 1.42E+00 | 1.90E-01  | 5.30E-01 | 6.20E-01  | 1.44E+00 | 5.80E-01  | 1.81E+00 | 5.50E-01  | 1.27E+00 |
| Glycine             | -5.40E-01 | 1.37E+00 | 5.90E-01  | 1.34E+00 | -6.10E-01 | 1.76E+00 | 5.20E-01  | 1.24E+00 | 5.10E-01  | 1.35E+00 | 7.30E-01  | 1.73E+00 |
| Glycolic acid       | 2.80E-01  | 7.20E-01 | 6.30E-01  | 1.39E+00 | -3.00E-02 | 3.00E-02 | 5.60E-01  | 1.33E+00 | 4.70E-01  | 1.44E+00 | 5.40E-01  | 1.20E+00 |
| Guanosine           | -5.10E-01 | 1.27E+00 | -6.60E-01 | 1.51E+00 | -2.10E-01 | 5.10E-01 | -3.00E-01 | 7.70E-01 | -4.70E-01 | 1.33E+00 | -1.00E-01 | 2.10E-01 |
| Histamine           | 2.30E-01  | 6.70E-01 | 6.80E-01  | 1.58E+00 | -2.40E-01 | 7.20E-01 | 5.20E-01  | 1.25E+00 | 4.20E-01  | 1.18E+00 | 6.20E-01  | 1.48E+00 |
| Histidine           | -7.00E-02 | 2.30E-01 | 6.10E-01  | 1.37E+00 | 3.30E-01  | 9.20E-01 | 7.60E-01  | 1.78E+00 | 6.00E-01  | 1.75E+00 | 6.50E-01  | 1.43E+00 |
| Homovallinic acid   | 3.10E-01  | 9.20E-01 | 5.00E-01  | 1.14E+00 | -2.70E-01 | 7.10E-01 | -1.10E-01 | 3.40E-01 | -2.60E-01 | 8.50E-01 | 1.60E-01  | 3.90E-01 |
| Hypoxanthine        | -4.00E-01 | 1.00E+00 | 3.90E-01  | 9.00E-01 | -4.90E-01 | 1.44E+00 | 3.10E-01  | 7.50E-01 | 2.60E-01  | 7.30E-01 | 5.50E-01  | 1.32E+00 |
| Inosine             | -6.90E-01 | 1.80E+00 | -8.90E-01 | 1.99E+00 | -4.00E-01 | 1.10E+00 | -7.80E-01 | 1.88E+00 | -7.70E-01 | 2.22E+00 | -6.40E-01 | 1.42E+00 |
| Isoleucine          | -3.70E-01 | 9.00E-01 | 5.90E-01  | 1.36E+00 | -4.30E-01 | 1.26E+00 | 5.80E-01  | 1.39E+00 | 4.30E-01  | 1.19E+00 | 7.20E-01  | 1.69E+00 |
| Lactic acid         | 3.40E-01  | 8.80E-01 | 7.80E-01  | 1.77E+00 | 1.70E-01  | 6.00E-01 | 7.50E-01  | 1.81E+00 | 4.60E-01  | 1.40E+00 | 4.90E-01  | 1.15E+00 |
| Leucine             | -3.70E-01 | 9.10E-01 | 5.90E-01  | 1.35E+00 | -4.20E-01 | 1.23E+00 | 5.90E-01  | 1.41E+00 | 3.80E-01  | 1.05E+00 | 7.20E-01  | 1.69E+00 |
| LPC 14:0 sn-1       | -1.70E-01 | 4.50E-01 | -4.30E-01 | 9.90E-01 | -1.10E-01 | 3.50E-01 | -4.90E-01 | 1.25E+00 | -2.60E-01 | 8.60E-01 | -1.90E-01 | 4.60E-01 |
| LPC 14:0 sn-2       | -1.30E-01 | 3.50E-01 | -4.20E-01 | 1.01E+00 | -1.10E-01 | 3.00E-01 | -4.90E-01 | 1.28E+00 | -8.00E-02 | 4.80E-01 | -2.80E-01 | 6.90E-01 |
| LPC 16:0 sn-1       | -1.20E-01 | 2.70E-01 | -3.30E-01 | 7.70E-01 | 1.20E-01  | 3.40E-01 | -1.10E-01 | 2.80E-01 | -2.80E-01 | 6.80E-01 | -2.30E-01 | 5.10E-01 |
| LPC 16:0 sn-2       | 4.00E-02  | 3.00E-02 | -6.00E-02 | 1.00E-01 | -2.60E-01 | 7.60E-01 | -4.40E-01 | 1.10E+00 | 2.00E-02  | 5.00E-02 | -5.00E-02 | 1.10E-01 |
| LPC 16:1 sn-1       | -2.50E-01 | 7.10E-01 | 1.00E-01  | 2.00E-01 | -2.00E-01 | 5.90E-01 | 2.60E-01  | 6.30E-01 | 2.90E-01  | 7.30E-01 | 3.40E-01  | 7.80E-01 |
| LPC 16:1 sn-2       | -3.20E-01 | 9.20E-01 | 9.00E-02  | 1.80E-01 | -3.40E-01 | 1.03E+00 | 2.30E-01  | 5.70E-01 | 1.70E-01  | 4.50E-01 | 4.60E-01  | 1.10E+00 |
| LPC 18:0 sn-1       | 8.00E-02  | 1.70E-01 | -2.80E-01 | 5.90E-01 | 2.90E-01  | 8.40E-01 | -7.00E-02 | 1.90E-01 | 3.00E-02  | 6.00E-02 | -3.10E-01 | 6.90E-01 |
| LPC 18:0 sn-2       | -8.00E-02 | 2.50E-01 | -3.00E-02 | 8.00E-02 | -1.30E-01 | 3.90E-01 | -7.00E-02 | 2.30E-01 | -6.00E-02 | 1.80E-01 | 7.00E-02  | 1.70E-01 |
| LPC 18:1 sn-1       | -2.00E-02 | 4.00E-02 | -1.20E-01 | 2.50E-01 | 3.00E-02  | 5.00E-02 | -6.00E-02 | 1.90E-01 | -4.00E-02 | 5.00E-02 | -1.20E-01 | 2.00E-01 |
| LPC 18:1 sn-2       | -1.40E-01 | 3.90E-01 | -1.80E-01 | 4.00E-01 | -1.60E-01 | 4.80E-01 | -2.10E-01 | 5.70E-01 | -6.00E-02 | 2.40E-01 | 1.00E-02  | 3.00E-02 |
| LPC 18:2 sn-1       | -1.10E-01 | 3.30E-01 | -1.10E-01 | 2.90E-01 | -1.40E-01 | 4.30E-01 | -1.60E-01 | 4.90E-01 | -1.40E-01 | 4.00E-01 | 4.00E-02  | 9.00E-02 |
| LPC 18:2 sn-2       | -5.00E-02 | 2.10E-01 | -1.20E-01 | 3.30E-01 | -2.40E-01 | 6.90E-01 | -3.50E-01 | 9.10E-01 | -1.60E-01 | 4.80E-01 | -6.00E-02 | 1.50E-01 |
| LPC 20:0 sn-1       | -8.00E-02 | 2.60E-01 | -1.60E-01 | 3.80E-01 | 1.20E-01  | 3.40E-01 | 1.10E-01  | 2.10E-01 | 2.30E-01  | 6.50E-01 | -5.00E-02 | 1.30E-01 |
| LPC 20:0 sn-2       | -6.00E-02 | 2.00E-01 | -2.50E-01 | 5.90E-01 | 1.00E-02  | 1.10E-01 | -1.30E-01 | 4.20E-01 | 1.80E-01  | 3.40E-01 | -2.00E-01 | 5.30E-01 |

|               |           |          |           |          |           |          |           |          |           |          |           |          |
|---------------|-----------|----------|-----------|----------|-----------|----------|-----------|----------|-----------|----------|-----------|----------|
| LPC 20:1 sn-1 | -1.00E-02 | 3.00E-02 | 5.00E-02  | 8.00E-02 | 5.00E-02  | 1.40E-01 | 1.60E-01  | 3.00E-01 | 9.00E-02  | 2.20E-01 | 4.00E-02  | 9.00E-02 |
| LPC 20:1 sn-2 | 1.00E-02  | 3.00E-02 | 2.30E-01  | 5.00E-01 | 7.00E-02  | 2.00E-01 | 3.90E-01  | 8.40E-01 | 2.30E-01  | 5.80E-01 | 2.60E-01  | 6.00E-01 |
| LPC 20:4 sn-1 | -2.00E-01 | 5.20E-01 | -3.40E-01 | 7.80E-01 | -1.60E-01 | 4.60E-01 | -3.60E-01 | 9.20E-01 | -3.40E-01 | 9.40E-01 | -5.00E-02 | 1.30E-01 |
| LPC 20:4 sn-2 | -2.10E-01 | 6.00E-01 | -4.10E-01 | 9.30E-01 | -2.70E-01 | 7.70E-01 | -5.20E-01 | 1.28E+00 | -3.40E-01 | 9.80E-01 | -2.00E-01 | 4.50E-01 |
| LPC 20:5 sn-1 | -5.10E-01 | 1.37E+00 | -2.10E-01 | 5.30E-01 | -3.00E-01 | 8.30E-01 | 2.30E-01  | 5.40E-01 | 5.10E-01  | 1.45E+00 | 4.30E-01  | 9.60E-01 |
| LPC 20:5 sn-2 | -6.70E-01 | 1.82E+00 | -3.30E-01 | 7.60E-01 | -3.60E-01 | 1.02E+00 | 1.90E-01  | 5.00E-01 | 4.50E-01  | 1.32E+00 | 6.00E-01  | 1.41E+00 |
| LPC 22:4 sn-1 | -1.60E-01 | 4.30E-01 | -2.40E-01 | 5.50E-01 | -4.00E-02 | 1.50E-01 | -1.10E-01 | 3.20E-01 | -2.70E-01 | 7.10E-01 | -3.00E-02 | 8.00E-02 |
| LPC 22:4 sn-2 | -2.00E-02 | 1.10E-01 | -2.00E-01 | 4.60E-01 | -1.00E-02 | 7.00E-02 | -2.30E-01 | 6.10E-01 | -2.70E-01 | 7.20E-01 | -1.60E-01 | 3.70E-01 |
| LPC 22:6 sn-1 | -2.10E-01 | 5.80E-01 | -1.90E-01 | 4.40E-01 | 4.00E-02  | 1.20E-01 | 2.60E-01  | 5.90E-01 | 1.50E-01  | 3.40E-01 | 1.10E-01  | 2.70E-01 |
| LPC 22:6 sn-2 | -1.80E-01 | 5.10E-01 | -1.60E-01 | 3.80E-01 | -2.50E-01 | 7.30E-01 | -2.40E-01 | 6.40E-01 | -4.00E-02 | 2.00E-01 | 8.00E-02  | 1.80E-01 |
| LPE 16:0 sn-1 | -1.70E-01 | 4.20E-01 | -1.70E-01 | 3.90E-01 | -1.90E-01 | 5.50E-01 | -1.90E-01 | 5.20E-01 | -1.10E-01 | 4.00E-01 | 1.00E-02  | 2.00E-02 |
| LPE 16:0 sn-2 | 5.00E-02  | 1.10E-01 | -1.40E-01 | 2.90E-01 | 1.00E-02  | 5.00E-02 | -1.40E-01 | 3.80E-01 | -1.90E-01 | 6.50E-01 | -1.50E-01 | 3.60E-01 |
| LPE 16:1 sn-1 | -2.40E-01 | 6.60E-01 | -9.00E-02 | 2.10E-01 | -1.90E-01 | 5.70E-01 | 1.00E-02  | 4.00E-02 | 3.00E-02  | 1.00E-02 | 1.60E-01  | 3.70E-01 |
| LPE 16:1 sn-2 | 8.00E-02  | 1.80E-01 | 3.80E-01  | 8.60E-01 | -9.00E-02 | 2.30E-01 | 3.30E-01  | 7.50E-01 | 2.10E-01  | 4.70E-01 | 3.40E-01  | 7.90E-01 |
| LPE 18:0 sn-1 | -1.00E-02 | 5.00E-02 | -3.40E-01 | 7.60E-01 | -4.00E-02 | 1.10E-01 | -3.70E-01 | 9.80E-01 | -3.80E-01 | 1.19E+00 | -2.90E-01 | 6.70E-01 |
| LPE 18:0 sn-2 | -1.40E-01 | 3.60E-01 | -3.20E-01 | 7.00E-01 | -1.30E-01 | 3.90E-01 | -3.00E-01 | 7.70E-01 | -2.70E-01 | 8.60E-01 | -1.40E-01 | 3.30E-01 |
| LPE 18:1 sn-1 | -1.50E-01 | 4.20E-01 | -1.00E-02 | 1.00E-02 | -1.00E-01 | 3.30E-01 | 8.00E-02  | 1.10E-01 | 6.00E-02  | 1.00E-01 | 1.30E-01  | 2.90E-01 |
| LPE 18:1 sn-2 | 2.50E-01  | 6.20E-01 | 2.40E-01  | 5.60E-01 | 2.50E-01  | 7.50E-01 | 2.70E-01  | 6.20E-01 | 6.00E-02  | 7.00E-02 | 1.10E-01  | 2.50E-01 |
| LPE 18:2 sn-1 | -1.00E-01 | 3.00E-01 | -2.00E-01 | 4.50E-01 | -1.70E-01 | 5.30E-01 | -2.50E-01 | 6.90E-01 | -2.20E-01 | 7.40E-01 | -6.00E-02 | 1.40E-01 |
| LPE 18:2 sn-2 | 3.00E-02  | 4.00E-02 | -9.00E-02 | 1.70E-01 | -2.60E-01 | 7.40E-01 | -2.60E-01 | 6.70E-01 | -2.60E-01 | 8.10E-01 | -9.00E-02 | 2.10E-01 |
| LPE 20:1 sn-1 | -1.20E-01 | 3.40E-01 | 1.00E-01  | 2.50E-01 | -1.10E-01 | 3.70E-01 | 1.50E-01  | 3.00E-01 | 1.80E-01  | 4.80E-01 | 2.00E-01  | 4.80E-01 |
| LPE 20:1 sn-2 | 2.40E-01  | 6.20E-01 | 2.20E-01  | 5.10E-01 | 2.90E-01  | 8.60E-01 | 2.90E-01  | 6.40E-01 | 8.00E-02  | 1.70E-01 | 8.00E-02  | 2.00E-01 |
| LPE 20:2 sn-1 | 3.20E-01  | 8.40E-01 | 2.20E-01  | 5.30E-01 | 2.90E-01  | 8.70E-01 | 2.30E-01  | 5.40E-01 | 6.00E-02  | 8.00E-02 | 3.00E-02  | 6.00E-02 |
| LPE 20:2 sn-2 | 2.60E-01  | 7.00E-01 | -4.70E-01 | 1.04E+00 | 3.00E-01  | 9.10E-01 | -4.50E-01 | 1.12E+00 | -3.50E-01 | 1.12E+00 | -5.70E-01 | 1.36E+00 |
| LPE 20:4 sn-1 | -1.50E-01 | 4.00E-01 | -3.40E-01 | 7.40E-01 | -1.70E-01 | 5.10E-01 | -3.30E-01 | 8.60E-01 | -3.20E-01 | 1.00E+00 | -1.90E-01 | 4.60E-01 |
| LPE 20:4 sn-2 | 8.00E-02  | 1.90E-01 | -1.30E-01 | 2.60E-01 | -1.00E-02 | 2.00E-02 | -1.70E-01 | 4.30E-01 | -2.40E-01 | 7.40E-01 | -1.60E-01 | 3.80E-01 |
| LPE 22:4 sn-1 | -2.20E-01 | 6.20E-01 | -3.00E-01 | 6.40E-01 | -2.00E-01 | 6.20E-01 | -2.40E-01 | 6.40E-01 | -1.90E-01 | 5.60E-01 | -4.00E-02 | 7.00E-02 |
| LPE 22:4 sn-2 | 1.00E-01  | 2.30E-01 | -2.00E-02 | 1.00E-02 | 1.00E-01  | 3.10E-01 | 2.00E-02  | 1.00E-02 | -1.20E-01 | 3.30E-01 | -7.00E-02 | 1.60E-01 |
| LPE 22:6 sn-1 | -3.30E-01 | 8.30E-01 | -1.80E-01 | 3.50E-01 | -9.00E-02 | 2.10E-01 | 1.00E-01  | 2.60E-01 | -9.00E-02 | 2.50E-01 | 1.50E-01  | 3.30E-01 |
| LPE 22:6 sn-2 | 1.50E-01  | 4.70E-01 | 6.00E-02  | 1.70E-01 | -2.20E-01 | 6.00E-01 | -1.20E-01 | 3.30E-01 | -1.00E-01 | 3.80E-01 | -1.00E-02 | 5.00E-02 |
| LPE P-16:0    | -1.80E-01 | 4.80E-01 | -4.30E-01 | 9.50E-01 | -1.60E-01 | 4.80E-01 | -3.90E-01 | 1.00E+00 | -3.10E-01 | 9.60E-01 | -2.00E-01 | 4.80E-01 |
| LPE P-18:0    | -1.60E-01 | 4.30E-01 | -4.10E-01 | 9.00E-01 | -1.40E-01 | 4.30E-01 | -3.70E-01 | 9.60E-01 | -2.90E-01 | 9.10E-01 | -2.10E-01 | 5.00E-01 |
| LPE P-18:1    | -1.10E-01 | 2.70E-01 | 7.00E-02  | 1.70E-01 | -9.00E-02 | 2.80E-01 | 1.20E-01  | 2.10E-01 | 1.00E-02  | 3.00E-02 | 1.40E-01  | 3.20E-01 |
| LPE P-20:0    | -1.80E-01 | 5.00E-01 | -4.60E-01 | 1.03E+00 | -1.10E-01 | 3.30E-01 | -3.90E-01 | 1.01E+00 | -2.80E-01 | 9.30E-01 | -2.80E-01 | 6.80E-01 |

|               |           |          |           |          |           |          |           |          |           |          |           |          |
|---------------|-----------|----------|-----------|----------|-----------|----------|-----------|----------|-----------|----------|-----------|----------|
| LPE P-20:1    | -4.00E-02 | 1.10E-01 | 5.00E-02  | 1.20E-01 | 1.00E-02  | 2.00E-02 | 1.30E-01  | 2.50E-01 | 6.00E-02  | 1.10E-01 | 8.00E-02  | 1.80E-01 |
| LPE P-22:1    | -1.00E-02 | 1.00E-02 | -1.40E-01 | 3.10E-01 | 1.50E-01  | 4.20E-01 | 1.00E-02  | 6.00E-02 | -1.00E-02 | 1.10E-01 | -1.40E-01 | 3.30E-01 |
| LPG 16:0 sn-1 | -1.00E-02 | 3.00E-02 | 3.90E-01  | 8.50E-01 | -4.00E-02 | 1.10E-01 | 4.30E-01  | 1.00E+00 | 1.70E-01  | 4.50E-01 | 3.90E-01  | 9.10E-01 |
| LPG 16:0 sn-2 | 3.00E-02  | 1.20E-01 | 4.10E-01  | 9.00E-01 | -1.40E-01 | 3.90E-01 | 4.00E-01  | 9.30E-01 | 2.20E-01  | 6.40E-01 | 4.50E-01  | 1.03E+00 |
| LPG 18:0 sn-1 | -2.00E-02 | 2.00E-02 | 4.10E-01  | 9.00E-01 | -5.00E-02 | 1.50E-01 | 4.50E-01  | 1.10E+00 | 1.40E-01  | 4.60E-01 | 4.10E-01  | 9.80E-01 |
| LPG 18:0 sn-2 | 1.40E-01  | 4.80E-01 | 4.50E-01  | 9.90E-01 | -3.10E-01 | 9.00E-01 | 1.70E-01  | 4.00E-01 | 1.30E-01  | 3.90E-01 | 3.20E-01  | 7.90E-01 |
| LPG 18:1 sn-1 | -1.80E-01 | 4.60E-01 | 5.30E-01  | 1.17E+00 | -1.70E-01 | 5.20E-01 | 6.90E-01  | 1.61E+00 | 8.00E-02  | 2.40E-01 | 6.30E-01  | 1.47E+00 |
| LPG 18:1 sn-2 | -1.30E-01 | 3.80E-01 | 4.50E-01  | 1.00E+00 | -1.90E-01 | 5.90E-01 | 4.80E-01  | 1.13E+00 | 2.70E-01  | 8.00E-01 | 5.10E-01  | 1.19E+00 |
| LPG 20:4 sn-1 | -2.90E-01 | 7.50E-01 | 2.40E-01  | 5.00E-01 | -2.30E-01 | 6.50E-01 | 4.90E-01  | 1.12E+00 | 1.00E-02  | 6.00E-02 | 5.30E-01  | 1.19E+00 |
| LPG 20:4 sn-2 | -1.40E-01 | 3.90E-01 | 3.00E-01  | 6.70E-01 | -3.20E-01 | 1.00E+00 | 1.80E-01  | 4.70E-01 | -3.00E-02 | 4.00E-02 | 4.40E-01  | 9.90E-01 |
| LPG 22:6 sn-1 | -2.30E-01 | 6.50E-01 | 6.80E-01  | 1.51E+00 | -3.00E-01 | 9.10E-01 | 7.50E-01  | 1.80E+00 | 1.70E-01  | 5.00E-01 | 7.50E-01  | 1.76E+00 |
| LPG 22:6 sn-2 | -2.30E-01 | 7.30E-01 | 6.50E-01  | 1.46E+00 | -1.70E-01 | 5.40E-01 | 6.90E-01  | 1.70E+00 | 2.30E-01  | 7.20E-01 | 7.30E-01  | 1.73E+00 |
| LPI 16:0 sn-1 | 6.60E-01  | 1.78E+00 | 5.30E-01  | 1.20E+00 | 4.00E-01  | 1.19E+00 | 1.70E-01  | 4.10E-01 | -3.00E-02 | 2.40E-01 | -3.70E-01 | 8.30E-01 |
| LPI 16:0 sn-2 | 4.20E-01  | 1.14E+00 | 3.70E-01  | 8.50E-01 | 3.30E-01  | 1.02E+00 | 2.90E-01  | 6.90E-01 | 0.00E+00  | 1.40E-01 | -9.00E-02 | 1.80E-01 |
| LPI 18:0 sn-1 | 5.50E-01  | 1.48E+00 | 1.40E-01  | 3.40E-01 | 3.30E-01  | 9.90E-01 | -9.00E-02 | 2.20E-01 | -1.70E-01 | 6.10E-01 | -4.00E-01 | 9.30E-01 |
| LPI 18:0 sn-2 | 4.70E-01  | 1.26E+00 | 1.30E-01  | 3.10E-01 | 2.90E-01  | 8.60E-01 | -7.00E-02 | 1.80E-01 | -1.50E-01 | 5.30E-01 | -3.20E-01 | 7.40E-01 |
| LPI 18:1 sn-1 | 4.10E-01  | 1.10E+00 | 2.60E-01  | 6.00E-01 | 2.00E-01  | 6.20E-01 | 1.00E-02  | 2.00E-02 | -1.50E-01 | 5.50E-01 | -2.70E-01 | 5.90E-01 |
| LPI 18:1 sn-2 | 4.20E-01  | 1.12E+00 | 2.80E-01  | 6.50E-01 | 1.90E-01  | 5.90E-01 | 5.00E-02  | 9.00E-02 | -1.00E-02 | 1.80E-01 | -1.90E-01 | 4.20E-01 |
| LPI 20:4 sn-1 | 5.00E-02  | 1.90E-01 | -1.00E-01 | 2.00E-01 | -1.00E-02 | 4.00E-02 | -2.30E-01 | 5.30E-01 | -2.40E-01 | 7.70E-01 | -1.70E-01 | 3.50E-01 |
| LPI 20:4 sn-2 | 3.80E-01  | 1.01E+00 | -2.00E-02 | 0.00E+00 | 1.20E-01  | 3.80E-01 | -2.00E-01 | 4.90E-01 | -1.90E-01 | 6.50E-01 | -3.60E-01 | 7.90E-01 |
| LPI 22:6 sn-1 | 3.00E-01  | 8.20E-01 | 5.80E-01  | 1.30E+00 | 2.00E-01  | 6.10E-01 | 5.20E-01  | 1.22E+00 | 2.40E-01  | 5.40E-01 | 1.90E-01  | 4.70E-01 |
| LPI 22:6 sn-2 | 5.70E-01  | 1.52E+00 | 4.80E-01  | 1.11E+00 | 5.00E-01  | 1.45E+00 | 4.30E-01  | 9.90E-01 | 2.00E-01  | 4.20E-01 | -6.00E-02 | 1.00E-01 |
| LPS 18:0 sn-1 | 1.10E-01  | 3.00E-01 | 2.00E-02  | 4.00E-02 | 1.40E-01  | 4.40E-01 | 7.00E-02  | 1.20E-01 | -8.00E-02 | 2.60E-01 | -7.00E-02 | 1.60E-01 |
| LPS 18:0 sn-2 | -3.00E-02 | 4.00E-02 | 1.00E-02  | 0.00E+00 | 5.00E-02  | 1.80E-01 | 1.30E-01  | 2.50E-01 | -5.00E-02 | 1.70E-01 | 2.00E-02  | 3.00E-02 |
| LPS 18:1 sn-1 | 1.60E-01  | 4.40E-01 | 2.70E-01  | 5.80E-01 | 2.10E-01  | 6.00E-01 | 3.30E-01  | 7.20E-01 | 6.00E-02  | 7.00E-02 | 6.00E-02  | 1.30E-01 |
| LPS 18:1 sn-2 | 4.90E-01  | 1.31E+00 | 3.50E-01  | 8.20E-01 | 4.30E-01  | 1.26E+00 | 3.50E-01  | 7.90E-01 | 1.30E-01  | 3.00E-01 | 4.00E-02  | 8.00E-02 |
| Lysine        | -5.00E-02 | 1.90E-01 | 5.90E-01  | 1.31E+00 | 2.00E-02  | 7.00E-02 | 5.60E-01  | 1.27E+00 | 6.30E-01  | 1.97E+00 | 6.20E-01  | 1.43E+00 |
| Malic acid    | -9.00E-02 | 1.70E-01 | 6.00E-01  | 1.40E+00 | -9.00E-02 | 1.70E-01 | 6.80E-01  | 1.64E+00 | 3.50E-01  | 1.19E+00 | 5.50E-01  | 1.35E+00 |
| Malonic acid  | 1.90E-01  | 5.50E-01 | 6.50E-01  | 1.46E+00 | -3.10E-01 | 8.00E-01 | 4.80E-01  | 1.14E+00 | 5.40E-01  | 1.62E+00 | 6.20E-01  | 1.42E+00 |
| Methionine    | -3.70E-01 | 9.00E-01 | 6.00E-01  | 1.37E+00 | -4.40E-01 | 1.26E+00 | 6.10E-01  | 1.47E+00 | 4.00E-01  | 1.11E+00 | 7.30E-01  | 1.71E+00 |
| Methylamine   | -6.30E-01 | 1.60E+00 | 5.00E-01  | 1.17E+00 | -5.90E-01 | 1.70E+00 | 5.10E-01  | 1.26E+00 | 2.90E-01  | 8.90E-01 | 7.50E-01  | 1.76E+00 |
| MG 14:0 (1)   | -8.00E-01 | 2.15E+00 | -8.00E-01 | 1.82E+00 | -8.40E-01 | 2.42E+00 | -8.10E-01 | 1.97E+00 | -5.20E-01 | 1.65E+00 | -4.80E-01 | 1.04E+00 |
| MG 16:0 (1)   | -8.00E-02 | 2.00E-01 | 4.40E-01  | 9.60E-01 | -1.90E-01 | 5.20E-01 | 4.60E-01  | 1.09E+00 | 4.20E-01  | 1.04E+00 | 5.60E-01  | 1.34E+00 |
| MG 16:0 (2)   | -8.00E-02 | 2.30E-01 | 3.50E-01  | 7.60E-01 | -2.00E-01 | 6.00E-01 | 3.40E-01  | 7.90E-01 | 4.00E-01  | 9.80E-01 | 4.70E-01  | 1.13E+00 |

|                                    |           |          |           |          |           |          |           |          |           |          |           |          |
|------------------------------------|-----------|----------|-----------|----------|-----------|----------|-----------|----------|-----------|----------|-----------|----------|
| MG 18:0 (1)                        | 2.50E-01  | 6.80E-01 | 3.40E-01  | 7.50E-01 | -3.00E-02 | 8.00E-02 | 6.00E-02  | 1.50E-01 | 1.30E-01  | 1.20E-01 | 1.00E-01  | 2.60E-01 |
| MG 18:0 (2)                        | -3.40E-01 | 1.03E+00 | -6.10E-01 | 1.36E+00 | -5.40E-01 | 1.62E+00 | -6.60E-01 | 1.63E+00 | -3.60E-01 | 1.20E+00 | -3.20E-01 | 6.70E-01 |
| MG 18:1 (1)                        | -6.90E-01 | 1.87E+00 | -7.20E-01 | 1.61E+00 | -6.70E-01 | 1.97E+00 | -7.10E-01 | 1.71E+00 | -3.80E-01 | 1.25E+00 | -3.80E-01 | 7.70E-01 |
| MG 18:1 (2)                        | -3.00E-02 | 6.00E-02 | 4.00E-01  | 9.30E-01 | 2.00E-02  | 4.00E-02 | 4.30E-01  | 9.90E-01 | 1.60E-01  | 4.60E-01 | 3.10E-01  | 7.40E-01 |
| MG 18:2 (2)                        | -7.00E-02 | 2.40E-01 | 0.00E+00  | 3.00E-02 | -2.80E-01 | 8.50E-01 | -2.40E-01 | 6.80E-01 | -1.70E-01 | 5.30E-01 | 7.00E-02  | 2.30E-01 |
| MG 20:4 (1)                        | -3.10E-01 | 8.10E-01 | -1.40E-01 | 3.30E-01 | -1.70E-01 | 4.80E-01 | 4.00E-02  | 2.00E-02 | -1.80E-01 | 4.40E-01 | 2.40E-01  | 5.10E-01 |
| MG 20:4 (2)                        | -4.00E-01 | 1.05E+00 | -2.10E-01 | 4.60E-01 | -2.00E-01 | 6.00E-01 | 5.00E-02  | 9.00E-02 | -2.00E-01 | 5.00E-01 | 3.00E-01  | 6.40E-01 |
| MG 22:6 (1)                        | -2.80E-01 | 8.20E-01 | 5.00E-02  | 1.20E-01 | -3.10E-01 | 9.10E-01 | 7.00E-02  | 1.50E-01 | -9.00E-02 | 2.30E-01 | 3.80E-01  | 8.20E-01 |
| MG 22:6 (2)                        | -4.20E-01 | 1.16E+00 | 4.00E-02  | 1.00E-01 | -4.10E-01 | 1.23E+00 | 1.10E-01  | 2.10E-01 | 0.00E+00  | 5.00E-02 | 4.70E-01  | 1.05E+00 |
| Monoisoamylamine                   | 6.80E-01  | 1.88E+00 | 6.10E-01  | 1.44E+00 | 2.00E-01  | 8.30E-01 | 3.00E-01  | 7.70E-01 | 3.60E-01  | 9.00E-01 | 1.80E-01  | 4.40E-01 |
| Myo-Inositol                       | -2.70E-01 | 6.80E-01 | -3.00E-02 | 6.00E-02 | 1.30E-01  | 3.90E-01 | 2.90E-01  | 6.20E-01 | 2.70E-01  | 8.60E-01 | 2.90E-01  | 7.10E-01 |
| NAA (N-acetylaspartate)            | -2.50E-01 | 5.70E-01 | -7.60E-01 | 1.65E+00 | -3.50E-01 | 9.70E-01 | -7.70E-01 | 1.81E+00 | -7.80E-01 | 2.31E+00 | -7.30E-01 | 1.61E+00 |
| NAAG (N-acetyl-aspartyl-glutamate) | -2.00E-01 | 6.10E-01 | -3.00E-02 | 7.00E-02 | 5.10E-01  | 1.46E+00 | 5.60E-01  | 1.29E+00 | -8.00E-02 | 1.80E-01 | 2.20E-01  | 4.50E-01 |
| N-Acetyl-L-glutamic acid           | -5.50E-01 | 1.49E+00 | -2.50E-01 | 4.90E-01 | -3.50E-01 | 1.05E+00 | -6.00E-02 | 2.30E-01 | 3.30E-01  | 8.30E-01 | 4.90E-01  | 1.13E+00 |
| N-Acetylneuraminic Acid            | 0.00E+00  | 1.10E-01 | 4.60E-01  | 9.80E-01 | 2.50E-01  | 6.00E-01 | 6.80E-01  | 1.60E+00 | 2.30E-01  | 7.20E-01 | 5.50E-01  | 1.15E+00 |
| Nervonic acid                      | -1.00E-01 | 3.00E-01 | -3.00E-01 | 6.50E-01 | -5.60E-01 | 1.66E+00 | -6.10E-01 | 1.55E+00 | -2.60E-01 | 8.60E-01 | -1.90E-01 | 3.60E-01 |
| Nicotinamide                       | -7.80E-01 | 2.08E+00 | -6.10E-01 | 1.34E+00 | -3.20E-01 | 8.70E-01 | -2.00E-01 | 4.10E-01 | -3.90E-01 | 1.05E+00 | 1.60E-01  | 3.40E-01 |
| Nicotinic acid                     | -4.80E-01 | 1.22E+00 | 6.00E-01  | 1.32E+00 | -2.10E-01 | 6.80E-01 | 6.60E-01  | 1.59E+00 | 7.50E-01  | 2.13E+00 | 7.50E-01  | 1.64E+00 |
| N-oleoyl taurine                   | -1.20E-01 | 3.20E-01 | 4.70E-01  | 1.02E+00 | -4.30E-01 | 1.21E+00 | 2.40E-01  | 6.20E-01 | 5.90E-01  | 1.69E+00 | 6.10E-01  | 1.39E+00 |
| Nonanoic acid                      | -3.50E-01 | 1.03E+00 | -5.60E-01 | 1.24E+00 | -4.00E-01 | 1.20E+00 | -5.00E-01 | 1.29E+00 | -3.40E-01 | 1.08E+00 | -3.30E-01 | 7.00E-01 |
| Octadecadienoic acid               | -4.60E-01 | 1.27E+00 | -1.40E-01 | 3.00E-01 | -5.20E-01 | 1.56E+00 | -2.40E-01 | 6.60E-01 | 1.30E-01  | 1.60E-01 | 4.70E-01  | 1.08E+00 |
| Oleic acid                         | -4.90E-01 | 1.32E+00 | 2.60E-01  | 5.70E-01 | -2.90E-01 | 8.20E-01 | 5.80E-01  | 1.39E+00 | 4.90E-01  | 1.50E+00 | 6.80E-01  | 1.56E+00 |
| Orthophosphate                     | 2.20E-01  | 6.30E-01 | 2.40E-01  | 5.30E-01 | 4.00E-02  | 1.70E-01 | 2.00E-02  | 0.00E+00 | 1.10E-01  | 2.90E-01 | -2.00E-02 | 1.30E-01 |
| Palmitic acid                      | -6.90E-01 | 1.83E+00 | 3.70E-01  | 7.90E-01 | -5.60E-01 | 1.60E+00 | 5.40E-01  | 1.26E+00 | 6.50E-01  | 1.84E+00 | 8.30E-01  | 1.88E+00 |
| Palmitoylcarnitine                 | 4.60E-01  | 1.20E+00 | 7.20E-01  | 1.61E+00 | 1.90E-01  | 6.10E-01 | 6.00E-01  | 1.46E+00 | 1.10E-01  | 3.60E-01 | 3.50E-01  | 8.90E-01 |
| Pantothenate                       | 1.60E-01  | 3.60E-01 | 7.00E-02  | 1.30E-01 | 5.30E-01  | 1.57E+00 | 4.10E-01  | 9.60E-01 | -3.10E-01 | 8.70E-01 | -5.00E-02 | 2.20E-01 |
| Phenylalanine                      | -4.40E-01 | 1.10E+00 | 5.50E-01  | 1.27E+00 | -4.80E-01 | 1.41E+00 | 5.50E-01  | 1.33E+00 | 4.20E-01  | 1.14E+00 | 7.30E-01  | 1.72E+00 |
| Phosphocholine                     | -6.10E-01 | 1.65E+00 | -6.50E-01 | 1.43E+00 | -3.90E-01 | 1.10E+00 | -4.50E-01 | 1.05E+00 | -6.50E-01 | 1.87E+00 | -1.10E-01 | 3.10E-01 |
| Phosphorylethanolamine             | -1.90E-01 | 5.00E-01 | -5.10E-01 | 1.11E+00 | -5.20E-01 | 1.54E+00 | -6.70E-01 | 1.59E+00 | -6.90E-01 | 2.08E+00 | -4.20E-01 | 9.70E-01 |
| Pimelic acid                       | -5.30E-01 | 1.44E+00 | -4.20E-01 | 9.60E-01 | -4.30E-01 | 1.24E+00 | -3.20E-01 | 8.50E-01 | -1.30E-01 | 6.10E-01 | 5.00E-02  | 4.00E-02 |
| Pipecolic acid                     | 2.80E-01  | 7.80E-01 | 6.70E-01  | 1.48E+00 | 5.70E-01  | 1.62E+00 | 8.80E-01  | 2.08E+00 | 5.00E-01  | 1.52E+00 | 5.10E-01  | 1.11E+00 |
| Proline                            | -2.00E-02 | 8.00E-02 | 5.20E-01  | 1.14E+00 | 3.30E-01  | 9.30E-01 | 7.40E-01  | 1.73E+00 | 5.20E-01  | 1.57E+00 | 5.30E-01  | 1.12E+00 |
| Putrescine                         | 7.00E-02  | 2.90E-01 | -5.10E-01 | 1.11E+00 | -4.00E-01 | 1.06E+00 | -7.60E-01 | 1.80E+00 | -5.70E-01 | 1.62E+00 | -5.10E-01 | 1.14E+00 |
| Pyridoxine                         | -3.50E-01 | 9.50E-01 | 4.80E-01  | 1.08E+00 | -4.80E-01 | 1.43E+00 | 4.60E-01  | 1.09E+00 | 3.90E-01  | 1.23E+00 | 7.00E-01  | 1.59E+00 |

|                           |           |          |           |          |           |          |           |          |           |          |           |          |
|---------------------------|-----------|----------|-----------|----------|-----------|----------|-----------|----------|-----------|----------|-----------|----------|
| Pyroglutamic acid         | -4.40E-01 | 1.08E+00 | 4.90E-01  | 1.11E+00 | -5.70E-01 | 1.63E+00 | 4.00E-01  | 9.70E-01 | 4.40E-01  | 1.11E+00 | 6.80E-01  | 1.64E+00 |
| Pyruvic acid              | 5.30E-01  | 1.37E+00 | 5.20E-01  | 1.21E+00 | 8.00E-02  | 3.40E-01 | 2.20E-01  | 5.60E-01 | 1.70E-01  | 3.70E-01 | 9.00E-02  | 2.90E-01 |
| Riboflavine               | -5.60E-01 | 1.44E+00 | 5.60E-01  | 1.32E+00 | -4.20E-01 | 1.22E+00 | 6.40E-01  | 1.59E+00 | 3.20E-01  | 9.60E-01 | 8.30E-01  | 1.99E+00 |
| Ribose                    | 3.70E-01  | 1.10E+00 | 7.20E-01  | 1.65E+00 | 2.10E-01  | 6.20E-01 | 6.60E-01  | 1.62E+00 | 3.80E-01  | 1.09E+00 | 6.00E-01  | 1.44E+00 |
| S-Adenosyl-L-homocysteine | 1.10E-01  | 2.20E-01 | -5.30E-01 | 1.13E+00 | 2.90E-01  | 8.90E-01 | -5.00E-01 | 1.15E+00 | -5.00E-01 | 1.51E+00 | -5.60E-01 | 1.22E+00 |
| Serine                    | -4.10E-01 | 1.03E+00 | 5.80E-01  | 1.31E+00 | -5.70E-01 | 1.64E+00 | 5.00E-01  | 1.19E+00 | 4.50E-01  | 1.18E+00 | 6.80E-01  | 1.60E+00 |
| Stearic acid              | -4.00E-02 | 1.90E-01 | 1.00E-01  | 2.90E-01 | -3.80E-01 | 1.15E+00 | -2.70E-01 | 7.10E-01 | -9.00E-02 | 3.90E-01 | 1.90E-01  | 4.70E-01 |
| Succinic acid             | -1.70E-01 | 4.70E-01 | -4.50E-01 | 1.03E+00 | -1.50E-01 | 4.70E-01 | -4.30E-01 | 1.13E+00 | -4.30E-01 | 1.20E+00 | -2.60E-01 | 7.30E-01 |
| Tartaric acid             | -7.00E-02 | 1.90E-01 | 3.60E-01  | 8.10E-01 | -2.30E-01 | 6.00E-01 | 3.10E-01  | 7.30E-01 | 4.90E-01  | 1.37E+00 | 4.20E-01  | 1.02E+00 |
| Taurine                   | -4.90E-01 | 1.22E+00 | 5.80E-01  | 1.32E+00 | -6.30E-01 | 1.83E+00 | 4.90E-01  | 1.17E+00 | 4.00E-01  | 1.09E+00 | 7.40E-01  | 1.76E+00 |
| Taurocholic acid          | -1.80E-01 | 4.80E-01 | -2.00E-02 | 9.00E-02 | 6.00E-02  | 1.50E-01 | 1.90E-01  | 4.30E-01 | -3.00E-01 | 1.04E+00 | 1.70E-01  | 3.50E-01 |
| Thiamine                  | -1.70E-01 | 3.90E-01 | 5.60E-01  | 1.29E+00 | -1.40E-01 | 4.00E-01 | 5.50E-01  | 1.37E+00 | 3.20E-01  | 9.20E-01 | 6.40E-01  | 1.54E+00 |
| Threonine                 | -5.80E-01 | 1.46E+00 | 5.90E-01  | 1.35E+00 | -6.70E-01 | 1.94E+00 | 5.40E-01  | 1.29E+00 | 4.70E-01  | 1.26E+00 | 7.50E-01  | 1.76E+00 |
| Thymidine                 | -4.20E-01 | 1.07E+00 | 1.50E-01  | 3.60E-01 | -3.80E-01 | 1.12E+00 | 1.90E-01  | 4.50E-01 | 2.00E-01  | 5.50E-01 | 4.30E-01  | 1.03E+00 |
| Thymine                   | -3.20E-01 | 7.90E-01 | 3.60E-01  | 8.40E-01 | -2.60E-01 | 7.80E-01 | 3.70E-01  | 8.90E-01 | 2.80E-01  | 7.70E-01 | 5.30E-01  | 1.28E+00 |
| Trimethylamine            | -1.60E-01 | 3.10E-01 | 2.80E-01  | 6.60E-01 | -1.00E-01 | 2.50E-01 | 3.50E-01  | 8.90E-01 | 4.20E-01  | 1.21E+00 | 4.00E-01  | 1.02E+00 |
| Trimethylamine-n-oxide    | 6.90E-01  | 1.85E+00 | 3.00E-01  | 7.00E-01 | 7.80E-01  | 2.26E+00 | 3.80E-01  | 9.20E-01 | -1.00E-02 | 3.00E-02 | -5.50E-01 | 1.26E+00 |
| Trimethyllysine N6,N6,N6  | 1.00E-01  | 1.60E-01 | -9.00E-02 | 2.30E-01 | 7.00E-02  | 1.60E-01 | -1.10E-01 | 2.40E-01 | -5.10E-01 | 1.51E+00 | -1.60E-01 | 3.40E-01 |
| Tryptamine                | 1.10E-01  | 2.70E-01 | 4.70E-01  | 1.06E+00 | 1.00E-01  | 2.30E-01 | 4.70E-01  | 1.10E+00 | 2.90E-01  | 8.70E-01 | 4.80E-01  | 1.09E+00 |
| Tryptophan                | -5.10E-01 | 1.28E+00 | 5.30E-01  | 1.20E+00 | -5.40E-01 | 1.59E+00 | 5.10E-01  | 1.23E+00 | 3.70E-01  | 1.02E+00 | 7.30E-01  | 1.73E+00 |
| Tyrosine                  | -4.80E-01 | 1.21E+00 | 6.00E-01  | 1.37E+00 | -6.10E-01 | 1.78E+00 | 5.60E-01  | 1.35E+00 | 4.60E-01  | 1.33E+00 | 7.70E-01  | 1.81E+00 |
| Uracil                    | 5.70E-01  | 1.44E+00 | 7.10E-01  | 1.58E+00 | 3.00E-01  | 8.20E-01 | 5.80E-01  | 1.31E+00 | 6.00E-01  | 1.74E+00 | 4.50E-01  | 1.03E+00 |
| Uridine                   | -6.60E-01 | 1.76E+00 | -8.40E-01 | 1.90E+00 | -2.20E-01 | 5.70E-01 | -6.80E-01 | 1.61E+00 | -5.00E-01 | 1.52E+00 | -7.10E-01 | 1.64E+00 |
| Valine                    | 3.40E-01  | 8.90E-01 | 6.30E-01  | 1.38E+00 | 3.40E-01  | 9.70E-01 | 6.00E-01  | 1.37E+00 | 5.60E-01  | 1.62E+00 | 3.60E-01  | 7.70E-01 |
| Xanthine                  | -4.90E-01 | 1.24E+00 | 5.60E-01  | 1.29E+00 | -5.90E-01 | 1.74E+00 | 4.70E-01  | 1.15E+00 | 3.20E-01  | 8.90E-01 | 7.50E-01  | 1.78E+00 |
| γ-Aminobutyric acid       | -4.20E-01 | 1.06E+00 | 6.30E-01  | 1.42E+00 | -6.00E-01 | 1.76E+00 | 5.00E-01  | 1.19E+00 | 3.70E-01  | 1.01E+00 | 7.30E-01  | 1.72E+00 |

**Table S4 (a and b).** Statistically significant metabolites that met the criteria of  $p$  value  $\leq 0.05$  and VIP value  $\geq 1.5$  from univariate and multivariate statistics for pairwise comparisons of the studied groups. In bold are compounds in common (table a. comparisons 1v4, 2v4, 4v5 and table b. comparisons 1v5, 2v5, 3v5).

| a. | 1v4                          |          |      | 2v4                          |          |      | 4v5                         |          |      |
|----|------------------------------|----------|------|------------------------------|----------|------|-----------------------------|----------|------|
|    | Compounds                    | $p$      | VIP  | Compounds                    | $p$      | VIP  | Compounds                   | $p$      | VIP  |
|    | 3-Hydroxybutyric acid        | 4.55E-04 | 2.01 | 4-Hydroxybenzoic acid        | 4.89E-03 | 1.93 | 5-Methylthioadenosine       | 1.90E-04 | 1.72 |
|    | 3-Methyl-2-oxovaleric acid   | 6.29E-03 | 1.62 | <b>Acetylcarnitine</b>       | 2.58E-04 | 2.13 | <b>Acetylcarnitine</b>      | 3.74E-04 | 1.66 |
|    | 4-Hydroxybenzoic acid        | 4.13E-04 | 1.97 | Alanine                      | 1.96E-02 | 1.86 | Alanine                     | 1.89E-03 | 1.79 |
|    | 4-Hydroxyphenyllactic acid   | 1.08E-02 | 1.46 | Arachidonoylcarnitine        | 7.64E-03 | 1.67 | <b>Asparagine</b>           | 2.18E-02 | 1.65 |
|    | 5-Methylthioadenosine        | 3.91E-03 | 1.68 | <b>Asparagine</b>            | 2.72E-02 | 1.96 | Betaine                     | 1.42E-03 | 1.56 |
|    | <b>Acetylcarnitine</b>       | 1.83E-06 | 2.31 | Citramalic acid              | 1.31E-02 | 1.57 | <b>Creatine</b>             | 7.91E-04 | 1.87 |
|    | Arachidonic acid             | 3.34E-03 | 2.04 | Citrulline                   | 1.14E-02 | 1.62 | Creatinine                  | 3.70E-03 | 1.52 |
|    | Arachidonoylcarnitine        | 9.19E-05 | 1.98 | <b>Creatine</b>              | 5.26E-04 | 2.29 | <b>Docosahexaenoic acid</b> | 1.38E-03 | 1.56 |
|    | <b>Asparagine</b>            | 1.69E-02 | 1.58 | D-Erythrose                  | 8.76E-03 | 1.60 | Docosapentaenoic acid       | 2.40E-05 | 1.90 |
|    | Carnitine                    | 4.22E-06 | 2.24 | Dimethylamine                | 1.65E-02 | 1.70 | Eicosapentaenoic acid       | 6.21E-04 | 1.63 |
|    | <b>Creatine</b>              | 1.77E-04 | 2.14 | <b>Docosapentaenoic acid</b> | 3.18E-03 | 1.86 | <b>Eicosatrienoic acid</b>  | 2.62E-05 | 1.89 |
|    | D-Erythrose                  | 3.56E-03 | 1.60 | <b>Eicosatrienoic acid</b>   | 2.10E-02 | 1.53 | <b>Glutamine</b>            | 6.58E-03 | 1.72 |
|    | D-Fructose                   | 3.70E-03 | 1.70 | Glutamic acid                | 7.73E-03 | 1.69 | Glyceric acid               | 4.89E-02 | 1.45 |
|    | Dimethylamine                | 1.33E-03 | 1.92 | <b>Glutamine</b>             | 1.14E-02 | 2.12 | Glycine                     | 4.42E-03 | 1.73 |
|    | <b>Docosapentaenoic acid</b> | 2.02E-03 | 1.77 | Glyceric acid                | 8.88E-03 | 1.75 | Histamine                   | 8.56E-03 | 1.48 |
|    | Eicosapentaenoic acid        | 6.91E-04 | 1.90 | Glycine                      | 3.18E-02 | 1.76 | Isoleucine                  | 9.57E-04 | 1.69 |
|    | <b>Eicosatrienoic acid</b>   | 6.17E-03 | 1.65 | <b>Methylamine</b>           | 7.73E-03 | 1.70 | Leucine                     | 5.18E-04 | 1.69 |
|    | <b>Glutamine</b>             | 1.93E-02 | 1.47 | MG 14:0 (1)                  | 2.19E-05 | 2.42 | LPG 18:1 sn-1               | 1.90E-03 | 1.47 |
|    | Inosine                      | 1.07E-03 | 1.80 | MG 18:0 (2)                  | 1.18E-02 | 1.62 | LPG 22:6 sn-1               | 5.16E-05 | 1.76 |
|    | LPC 20:5 sn-2                | 9.00E-04 | 1.82 | MG 18:1 (1)                  | 1.38E-03 | 1.99 | LPG 22:6 sn-2               | 2.59E-04 | 1.73 |
|    | LPI 16:0 sn-1                | 1.25E-03 | 1.78 | Nervonic acid                | 1.03E-02 | 1.66 | Methionine                  | 2.66E-04 | 1.71 |
|    | LPI 18:0 sn-1                | 1.05E-02 | 1.48 | Octadecadienoic acid         | 1.51E-02 | 1.56 | <b>Methylamine</b>          | 9.20E-04 | 1.76 |
|    | LPI 22:6 sn-2                | 9.13E-03 | 1.52 | <b>Palmitic acid</b>         | 1.12E-02 | 1.60 | NAA (N-acetylaspartate)     | 1.30E-04 | 1.61 |
|    | <b>Methylamine</b>           | 3.41E-03 | 1.60 | Pantothenate                 | 1.82E-02 | 1.57 | Nicotinic acid              | 4.51E-02 | 1.64 |
|    | MG 14:0 (1)                  | 2.05E-05 | 2.15 | Phosphorylethanolamine       | 1.82E-02 | 1.54 | Oleic acid                  | 1.80E-03 | 1.56 |
|    | MG 18:1 (1)                  | 3.58E-05 | 2.11 | Pipecolic acid               | 8.84E-03 | 1.62 | <b>Palmitic acid</b>        | 4.83E-05 | 1.88 |
|    | Monoisoamylamine             | 2.67E-03 | 1.88 | Pyroglutamic acid            | 2.84E-02 | 1.63 | Phenylalanine               | 3.51E-04 | 1.72 |
|    | N-Acetyl-L-glutamic acid     | 1.52E-02 | 1.49 | Serine                       | 4.48E-02 | 1.64 | Pyridoxine                  | 4.67E-04 | 1.59 |
|    | Nicotinamide                 | 6.63E-05 | 2.08 | Taurine                      | 1.72E-02 | 1.83 | Pyroglutamic acid           | 9.82E-04 | 1.64 |
|    | <b>Palmitic acid</b>         | 1.22E-03 | 1.83 | <b>Threonine</b>             | 2.04E-02 | 1.94 | Riboflavine                 | 9.39E-05 | 1.99 |
|    | Phosphocholine               | 4.65E-03 | 1.65 | Trimethylamine-n-oxide       | 8.09E-04 | 2.26 | Serine                      | 8.24E-03 | 1.60 |



|                        |          |      |                             |          |      |                             |          |      |
|------------------------|----------|------|-----------------------------|----------|------|-----------------------------|----------|------|
| <b>Threonine</b>       | 2.31E-02 | 1.46 | Tryptophan                  | 2.83E-02 | 1.59 | Taurine                     | 8.59E-04 | 1.76 |
| Trimethylamine-n-oxide | 2.06E-03 | 1.85 | Tyrosine                    | 1.89E-02 | 1.78 | Thiamine                    | 1.12E-03 | 1.54 |
| Uridine                | 1.77E-03 | 1.76 | Xanthine                    | 2.25E-02 | 1.74 | Threonine                   | 4.78E-03 | 1.76 |
|                        |          |      | $\gamma$ -Aminobutyric acid | 2.02E-02 | 1.76 | Tryptophan                  | 5.47E-04 | 1.73 |
|                        |          |      |                             |          |      | Tyrosine                    | 6.52E-04 | 1.81 |
|                        |          |      |                             |          |      | Uridine                     | 4.17E-04 | 1.64 |
|                        |          |      |                             |          |      | Xanthine                    | 7.09E-04 | 1.78 |
|                        |          |      |                             |          |      | $\gamma$ -Aminobutyric acid | 1.18E-03 | 1.72 |

| b. | 1v5                            |          |      | 2v5                          |          |      | 3v5                            |          |      |
|----|--------------------------------|----------|------|------------------------------|----------|------|--------------------------------|----------|------|
|    | Compounds                      | <i>p</i> | VIP  | Compounds                    | <i>p</i> | VIP  | Compounds                      | <i>p</i> | VIP  |
|    | 2-Hydroxybutyric acid          | 1.87E-03 | 1.57 | 2-Hydroxybutyric acid        | 7.54E-03 | 1.48 | 2-Hydroxyisovaleric acid       | 2.95E-03 | 1.92 |
|    | 3,4-Dihydroxyphenylacetic acid | 5.11E-04 | 1.63 | <b>5-Methylthioadenosine</b> | 1.55E-05 | 1.93 | <b>5-Methylthioadenosine</b>   | 8.31E-04 | 2.17 |
|    | 3-Hydroxybutyric acid          | 5.69E-06 | 1.87 | <b>Arginine</b>              | 1.08E-05 | 1.96 | <b>Arginine</b>                | 1.36E-05 | 2.41 |
|    | 5-Hydroxy indole-3-acetic acid | 3.91E-04 | 1.63 | <b>Aspartic acid</b>         | 7.73E-04 | 1.66 | <b>Aspartic acid</b>           | 6.35E-04 | 2.04 |
|    | <b>5-Methylthioadenosine</b>   | 3.31E-07 | 1.97 | Azelaic acid                 | 2.55E-03 | 1.52 | Azelaic acid                   | 5.54E-04 | 1.97 |
|    | Arachidonic acid               | 5.48E-04 | 1.97 | Betaine                      | 2.79E-04 | 1.83 | Citrulline                     | 1.97E-02 | 1.52 |
|    | <b>Arginine</b>                | 4.17E-05 | 1.76 | Citrulline                   | 2.43E-04 | 1.80 | <b>Cytidine</b>                | 3.44E-04 | 2.10 |
|    | <b>Aspartic acid</b>           | 2.18E-05 | 1.83 | <b>Cytidine</b>              | 2.22E-03 | 1.51 | <b>Cytosine</b>                | 5.05E-04 | 2.06 |
|    | Carnitine                      | 3.88E-05 | 1.78 | <b>Cytosine</b>              | 3.60E-03 | 1.49 | Docosahexaenoic acid           | 1.43E-02 | 1.62 |
|    | <b>Cytidine</b>                | 2.58E-04 | 1.65 | Dimethylamine                | 7.13E-04 | 1.68 | Docosapentaenoic acid          | 5.01E-04 | 2.17 |
|    | <b>Cytosine</b>                | 6.44E-04 | 1.60 | Glutamic acid                | 8.86E-05 | 1.86 | Eicosapentaenoic acid          | 1.95E-03 | 1.96 |
|    | Dimethylamine                  | 8.02E-05 | 1.75 | Histidine                    | 2.02E-04 | 1.78 | Eicosatrienoic acid            | 2.87E-03 | 1.97 |
|    | Guanosine                      | 1.30E-03 | 1.51 | <b>Inosine</b>               | 4.74E-05 | 1.88 | Glutamic acid                  | 3.21E-03 | 1.86 |
|    | Histamine                      | 4.32E-03 | 1.58 | Lactic acid                  | 2.41E-04 | 1.81 | Glycerol                       | 4.72E-03 | 1.81 |
|    | <b>Inosine</b>                 | 1.84E-07 | 1.99 | LPG 18:1 sn-1                | 4.03E-02 | 1.61 | Histidine                      | 7.00E-03 | 1.75 |
|    | Lactic acid                    | 7.66E-05 | 1.77 | LPG 22:6 sn-1                | 1.58E-04 | 1.80 | <b>Inosine</b>                 | 3.06E-04 | 2.22 |
|    | LPG 22:6 sn-1                  | 8.50E-04 | 1.51 | LPG 22:6 sn-2                | 9.25E-04 | 1.70 | LPC 20:5 sn-1                  | 2.99E-02 | 1.45 |
|    | <b>MG 14:0 (1)</b>             | 9.26E-06 | 1.82 | Malic acid                   | 9.00E-04 | 1.64 | Lysine                         | 2.00E-03 | 1.97 |
|    | MG 18:1 (1)                    | 2.02E-06 | 1.90 | Methionine                   | 1.22E-03 | 1.47 | Malonic acid                   | 2.46E-02 | 1.62 |
|    | <b>NAA (N-acetylaspartate)</b> | 1.49E-05 | 1.65 | <b>MG 14:0 (1)</b>           | 1.14E-05 | 1.97 | <b>MG 14:0 (1)</b>             | 1.04E-02 | 1.65 |
|    | Palmitoylcarnitine             | 6.35E-04 | 1.61 | MG 18:0 (2)                  | 1.48E-03 | 1.63 | <b>NAA (N-acetylaspartate)</b> | 3.77E-06 | 2.31 |

|                |          |      |                                |          |      |                           |          |      |
|----------------|----------|------|--------------------------------|----------|------|---------------------------|----------|------|
| Ribose         | 3.05E-04 | 1.65 | MG 18:1 (1)                    | 1.35E-04 | 1.86 | Nicotinic acid            | 3.55E-02 | 2.13 |
| Uracil         | 1.31E-04 | 1.58 | <b>NAA (N-acetylaspartate)</b> | 1.31E-05 | 1.81 | N-oleoyl taurine          | 1.73E-02 | 1.69 |
| <b>Uridine</b> | 4.60E-06 | 1.90 | N-Acetylneuraminic Acid        | 1.72E-03 | 1.60 | Oleic acid                | 2.95E-02 | 1.50 |
|                |          |      | Nervonic acid                  | 3.06E-03 | 1.55 | Palmitic acid             | 6.31E-03 | 1.84 |
|                |          |      | Nicotinic acid                 | 4.21E-02 | 1.59 | Phosphocholine            | 4.00E-03 | 1.87 |
|                |          |      | Palmitoylcarnitine             | 6.15E-03 | 1.46 | Phosphorylethanolamine    | 3.02E-04 | 2.08 |
|                |          |      | Phosphorylethanolamine         | 1.28E-03 | 1.59 | Pipecolic acid            | 3.06E-02 | 1.52 |
|                |          |      | Pipecolic acid                 | 5.64E-06 | 2.08 | Proline                   | 2.17E-02 | 1.57 |
|                |          |      | Proline                        | 6.10E-04 | 1.73 | Putrescine                | 1.40E-02 | 1.62 |
|                |          |      | Putrescine                     | 3.82E-04 | 1.80 | S-Adenosyl-L-homocysteine | 9.46E-03 | 1.51 |
|                |          |      | Ribose                         | 1.09E-03 | 1.62 | Trimethyllysine N6,N6,N6  | 3.23E-02 | 1.51 |
|                |          |      | Rivoflavine                    | 3.98E-03 | 1.59 | Uracil                    | 6.61E-03 | 1.74 |
|                |          |      | <b>Uridine</b>                 | 1.41E-03 | 1.61 | <b>Uridine</b>            | 2.51E-02 | 1.52 |
|                |          |      |                                |          |      | Valine                    | 1.24E-02 | 1.62 |

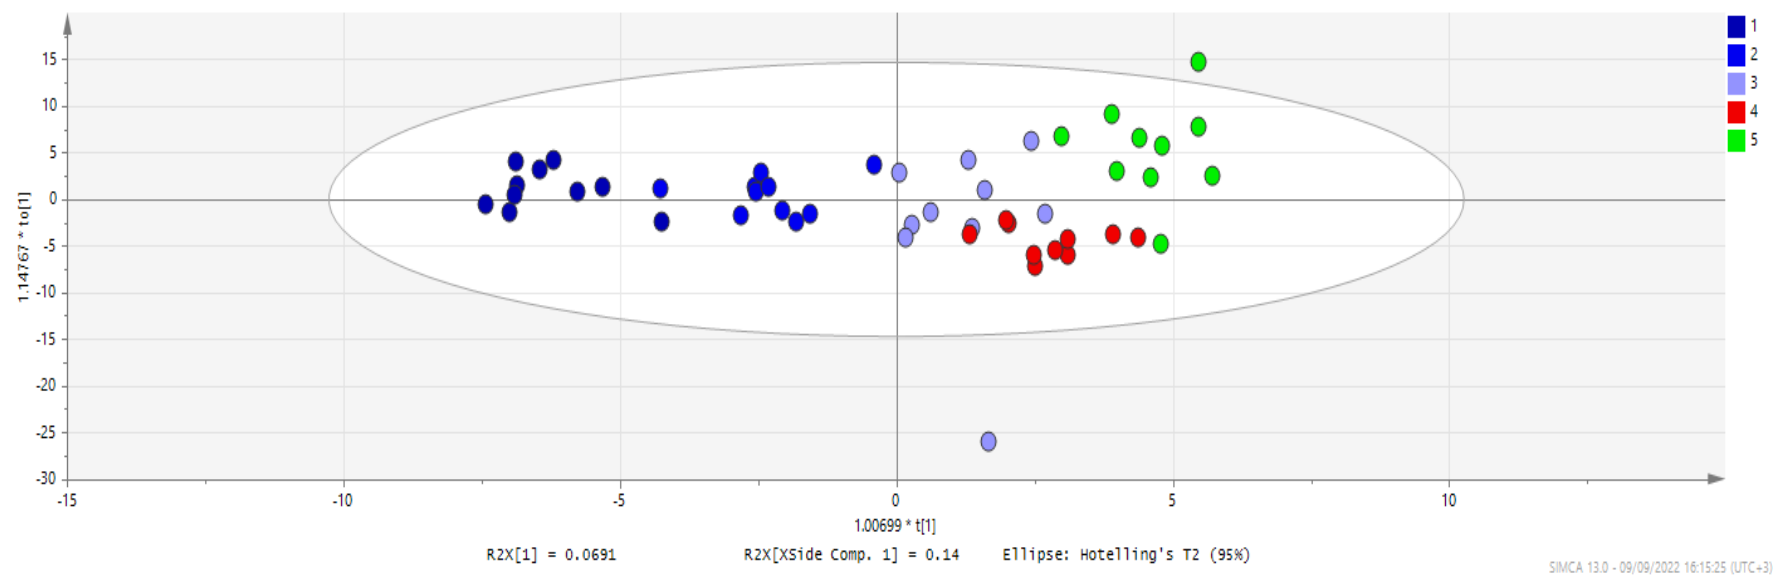

**Figure S1.** OPLS score plot of the model constructed for the five studied groups. Infected mice (G4) are colored in red and controls (G5) are colored in green. The three treatment groups are shown in dark blue (G1), in blue (G2) and in light blue (G3).

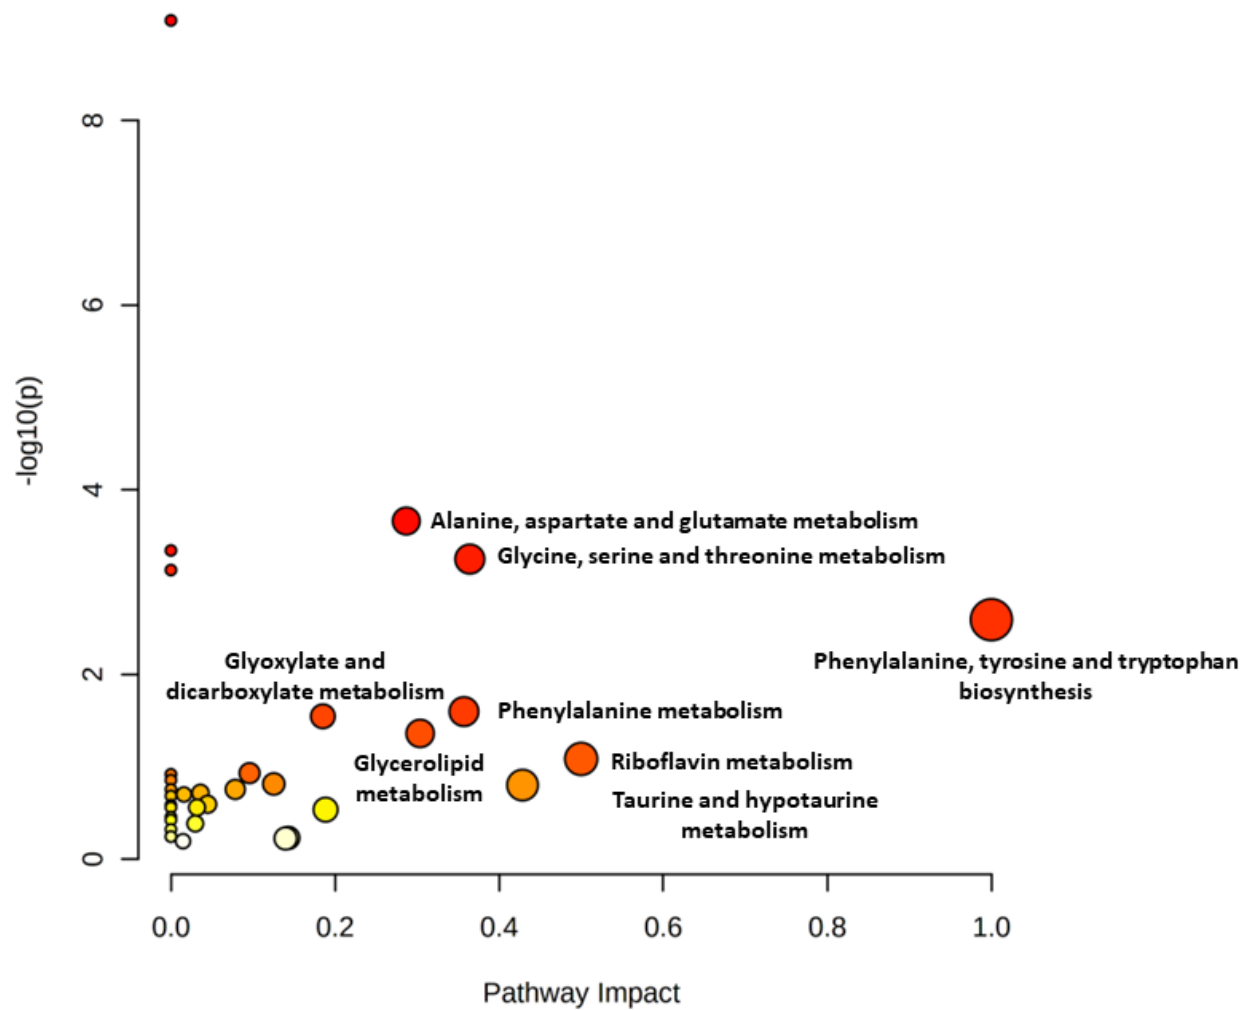

**Figure S2.** Metabolic pathways highlighted by MetaboAnalyst 5.0 to have been affected by CDI based on the differentiated metabolites in brain. The x-axis represents the values of pathway impact extracted from the pathway topological analysis. The y-axis represents the  $-\log$  of the  $p$ -value derived from the pathway enrichment analysis. The pathways with higher scores of both values were illustrated on top right region of the contracted plot.
